# Supplementary material for: Association of SNPs in the PAI1 Gene with Disease Recurrence and Clinical Outcome in Bladder Cancer
Source: Int J Mol Sci. 2023 Mar 3;24(5):4943. doi: 10.3390/ijms24054943 (PMC10003630; doi:10.3390/ijms24054943)
Supplement: Supplementary file 1 [file ijms-24-04943-s001.zip]

Archive with 16 entries (16 files):
- Supplemental Figures.pptx
- Supplemental Table 1.xlsx
- Supplemental Table 10.xlsx
- Supplemental Table 11.xlsx
- Supplemental Table 12.xlsx
- Supplemental Table 13.xlsx
- Supplemental Table 14.xlsx
- Supplemental Table 2.xlsx
- Supplemental Table 3.xlsx
- Supplemental Table 4.xlsx
- Supplemental Table 5.xlsx
- Supplemental Table 6.xlsx
- Supplemental Table 7.xlsx
- Supplemental Table 8.xlsx
- Supplemental Table 9.xlsx
- Supplementary methods.pdf
