# Supplementary material for: Association of SNPs in the PAI1 Gene with Disease Recurrence and Clinical Outcome in Bladder Cancer
Source: Int J Mol Sci. 2023 Mar 3;24(5):4943. doi: 10.3390/ijms24054943 (PMC10003630; doi:10.3390/ijms24054943)
Supplement: Supplementary file 1 [file ijms-24-04943-s001.zip › Supplemental Table 1.xlsx]

## Sheet: Sheet1
Table S1. Alterations of PAI-1 in human bladder cell lines
Genetic alteration	Cell line	Grade/Stage	Site/Region	Nucleotide change	mRNA expression	Amino acid change	Ref SNP no.
Point mutation	UMUC-3	UC, grade III	PAI-1 exon 2	43 G > A transition	+	GCC > ACC; A > T; Substitution	rs6092
	UMUC-14	UC, grade IV	PAI-1 exon 2	43 G > A transition	+	GCC > ACC; A > T; Substitution	rs6092
	5637	UC, grade II	PAI-1 exon 2	49 G > A transition	-	GTC > ATC; V > I; Substitution	rs6090
	UMUC-1	Lymphatic metastasis from UC, grade II	PAI-1 exon 9	399 T > C transition	+	None	rs11178
	UMUC-13	Lymphatic metastasis from UC	PAI-1 exon 9	399 T > C transition	+	None	rs11178
	253J	UC, grade IV, non-metastatic	PAI-1 exon 9	399 T > C transition	+	None	rs11178
	253J B-V	UC, grade IV, metastatic	PAI-1 exon 9	399 T > C transition	+	None	rs11178
	TCCSUP	UC, grade IV	PAI-1 exon 9	399 T > C transition	-	None	rs11178
	UMUC-1	Lymphatic metastasis from UC, grade II	PAI-1 exon 9	760 T > G transversion	+	None	rs7242
	UMUC-13	Lymphatic metastasis from UC	PAI-1 exon 9	760 T > G transversion	+	None	rs7242
	253J	UC, grade IV, non-metastatic	PAI-1 exon 9	760 T > G transversion	+	None	rs7242
	253J B-V	UC, grade IV, metastatic	PAI-1 exon 9	760 T > G transversion	+	None	rs7242
	TCCSUP	UC, grade IV	PAI-1 exon 9	760 T > G transversion	-	None	rs7242
	RT4	Urothelial papilloma, grade I	PAI-1 exon 9	760 T > G transversion	-	None	rs7242
Insertion	UMUC-1	Lymphatic metastasis from UC, grade II	PAI-1 exon 9	1044 +CCGCGCCCC 9 bp insertion	+	None	rs41423845
	UMUC-3	UC, grade III	PAI-1 exon 9	1044 +CCGCGCCCC 9 bp insertion	+	None	rs41423845
	UMUC-13	Lymphatic metastasis from UC	PAI-1 exon 9	1044 +CCGCGCCCC 9 bp insertion	+	None	rs41423845
	UMUC-14	UC, grade IV	PAI-1 exon 9	1044 +CCGCGCCCC 9 bp insertion	+	None	rs41423845
	253J	UC, grade IV, non-metastatic	PAI-1 exon 9	1044 +CCGCGCCCC 9 bp insertion	+	None	rs41423845
	253J B-V	UC, grade IV, metastatic	PAI-1 exon 9	1044 +CCGCGCCCC 9 bp insertion	+	None	rs41423845
	TCCSUP	UC, grade IV	PAI-1 exon 9	1044 +CCGCGCCCC 9 bp insertion	-	None	rs41423845
	5637	UC, grade II	PAI-1 exon 9	1044 +CCGCGCCCC 9 bp insertion	-	None	rs41423845
	RT4	Urothelial papilloma, grade I	PAI-1 exon 9	1044 +CCGCGCCCC 9 bp insertion	-	None	rs41423845
Abbreviation: UC, Urothelial carcinoma
UROtsa, RT112 and T24 cell lines were not noted to harbor any genetic alerations of PAI-1.
