# Supplementary material for: Association of SNPs in the PAI1 Gene with Disease Recurrence and Clinical Outcome in Bladder Cancer
Source: Int J Mol Sci. 2023 Mar 3;24(5):4943. doi: 10.3390/ijms24054943 (PMC10003630; doi:10.3390/ijms24054943)
Supplement: Supplementary file 1 [file ijms-24-04943-s001.zip › Supplemental Table 2.xlsx]

## Sheet: Sheet1
Table S2. Alterations in PAI-1 gene
Cohort 1 - Screening
Genetic alteration	Site/Region	Nucleotide change	Ref SNP no.	Frequency
Insertion	PAI-1 exon 9	14 +T		0.011
Insertion	PAI-1 exon 9	24 +A		0.011
Point Mutation	PAI-1 exon 9	25 T > G		0.011
Point Mutation	PAI-1 exon 9	61 C > T		0.011
Point Mutation	PAI-1 exon 9	276 A > G		0.011
Point Mutation	PAI-1 exon 9	399 T > C	rs11178	0.141
Point Mutation	PAI-1 exon 9	723 C > T	rs1050766	0.033
Point Mutation	PAI-1 exon 9	760 T > G	rs7242	0.109
Point Mutation	PAI-1 exon 9	728 T > C		0.022
Insertion	PAI-1 exon 9	806 G(4) > G(5)		0.033
Point Mutation	PAI-1 exon 9	852 T > G		0.011
Point Mutation	PAI-1 exon 9	855 G > A		0.011
Point Mutation	PAI-1 exon 9	910 T > C		0.011
Point Mutation	PAI-1 exon 9	916 T > G		0.011
Point Mutation	PAI-1 exon 9	929 C > T		0.011
Point Mutation	PAI-1 exon 9	930 G > A	rs1050813	0.098
Point Mutation	PAI-1 exon 9	988 C > T		0.011
Insertion	PAI-1 exon 9	1044 +CCGCGCCCC	rs41423845	0.467
Insertion	PAI-1 exon 9	1051 +T		0.011
Point Mutation	PAI-1 exon 9	1092 G > C		0.011
Point Mutation	PAI-1 exon 9	1224 C > T		0.033
Point Mutation	PAI-1 exon 9	1487 C > T	rs2227716	0.022
Insertion	PAI-1 exon 9	1633 +C		0.011
Point Mutation	PAI-1 exon 9	1775 G > A	rs1050955	0.065
Point Mutation	PAI-1 exon 9	1787 T > C		0.011
Cohort 2 - Discovery
Genetic alteration	Site/Region	Nucleotide change	Ref SNP no.	Frequency
Point Mutation	PAI-1 exon 2	43 G > A	rs6092	0.115
Point Mutation	PAI-1 exon 9	181 G > A		0.013
Point Mutation	PAI-1 exon 9	205 C > T		0.013
Point Mutation	PAI-1 exon 9	218 C > T		0.013
Insertion	PAI-1 exon 9	222 +T		0.013
Point Mutation	PAI-1 exon 9	399 T > C	rs11178	0.192
Point Mutation	PAI-1 exon 9	723 C > T	rs1050766	0.026
Point Mutation	PAI-1 exon 9	760 T > G	rs7242	0.487
Point Mutation	PAI-1 exon 9	930 G > A	rs1050813	0.064
Point Mutation	PAI-1 exon 9	1026 T > C		0.013
Insertion	PAI-1 exon 9	1044 +CCGCGCCCC	rs41423845	0.603
Insertion	PAI-1 exon 9	1103 +A		0.013
Insertion	PAI-1 exon 9	1310 +G	rs2227715	0.013
Insertion	PAI-1 exon 9	1311 +G		0.013
Insertion	PAI-1 exon 9	1315 +G		0.026
Point Mutation	PAI-1 exon 9	1315 T > G		0.013
Point Mutation	PAI-1 exon 9	1487 C > T	rs2227716	0.051
Deletion	PAI-1 exon 9	1497 -A		0.013
Point Mutation	PAI-1 exon 9	1775 G > A	rs1050955	0.038
