# Supplementary material for: Association of SNPs in the PAI1 Gene with Disease Recurrence and Clinical Outcome in Bladder Cancer
Source: Int J Mol Sci. 2023 Mar 3;24(5):4943. doi: 10.3390/ijms24054943 (PMC10003630; doi:10.3390/ijms24054943)
Supplement: Supplementary file 1 [file ijms-24-04943-s001.zip › Supplemental Table 3.xlsx]

## Sheet: Sheet1
Table S3. Predicted miRNA binding sites on PAI-1 3’ UTR (DIANA microT-CDS)
miRNA	Also predicted	Binding type	SNP (Ref SNP no.)
hsa-miR-548t-5p	Miranda	6mer	399
	TargetScan		(rs11178)
hsa-miR-486-5p	Miranda	7mer	399
			(rs11178)
hsa-miR-143-3p	Miranda	6mer	930
	TargetScan		(rs1050813)
hsa-miR-5011-5p	-	8mer	1487
			(rs2227716)
hsa-miR-1277-5p	-	9mer	1487
			(rs2227716)
hsa-miR-583	Miranda	6mer	1487
			(rs2227716)
hsa-miR-4311	Miranda	7mer	1487
			(rs2227716)
hsa-miR-548ah-5p	TargetScan	8mer	1775
			(rs1050955)
hsa-miR-5689	-	8mer	1775
			(rs1050955)
