# Supplementary material for: Association of SNPs in the PAI1 Gene with Disease Recurrence and Clinical Outcome in Bladder Cancer
Source: Int J Mol Sci. 2023 Mar 3;24(5):4943. doi: 10.3390/ijms24054943 (PMC10003630; doi:10.3390/ijms24054943)
Supplement: Supplementary file 1 [file ijms-24-04943-s001.zip › Supplemental Table 4.xlsx]

## Sheet: 5637
Supplemental Table 4: The list of DGEs between Control and WT.
HSPA6
PLEC1
MEN1
HSPA7
CATSPER2
CRCP
CCBE1
LOC650285
LOC653489
HSPA1B
FLJ36131
LOC100128084
LOC100128505
LOC100132391
LOC652750
LOC730313
LOC645452
LOC100133516
SSTR2
LOC653086
LOC100132585
CREB1
LOC255167
LOC90586
RHBDL2
LOC100130053
FLJ46309
DMC1
HSD17B7
C5orf22
DUXAP3
TTTY14
CDKN2AIPNL
SASS6
ARL16
DNAJB1
ZNF682
C8orf37
EID2B
SPTLC1
FLJ41941
TMEM88
PPA2
C8orf45
FLJ35390
LOC389765
IL17RD
LOC728903
LOC729090
LOC653421
PIP5K2B
CD68
EIF2C2
HCG2P7
C15orf63
TSGA13
LOC731542
MUC6
DDX51
CHRNB3
MGC26356
LOC100131718
C21orf24
SLC4A5
ZNF652
C9orf80
HIATL2
RBM3
RPPH1
LILRB1
FAM175A
LOC646734
C5orf28
LOC100129211
MCART1
GPR1
FCAR
LOC644250
NLRP8
CRYAB
LOC100134159
LOC100132727
LOC100132564
LOC100190938
LOC100133177
LOC646996
FAM73A
LOC100129502
COX18
AIRE
LOC648921
LOC399900
BAG3
LOC100130168
DLK2
IL10
C20orf55
RGS12
THRA
RIMS4
SDHALP1
BARX2
RMRP
TDP1
L1CAM
DUSP1
LOC730920
LOC100132784
CTSB
ZNF14
C3orf34
FKTN
KIAA1751
LOC100129362
LOC643509
SEMA3E
LOC100130516
SLC44A4
ZNF486
ZNF430
LOC729603
ALPP
PDE4C
LOC100133478
SLC16A12
RFT1
MBTD1
LOC648852
LOC100129269
TMEM106A
RHOBTB1
LOC644745
LOC645895
FLJ40722
LOC100128288
ZNF394
LOC100133445
C14orf85
FLJ25363
ANKRD35
ANKRD50
NR3C1
AHR
POFUT1
LOC100130835
LOC100130445
LOC100128266
FAM40B
CCDC125
GGT2
CDAN1
MCM8
NUBPL
GJC1
PTGR2
PNPT1
LOC388282
TGM6
LOXHD1
ZMAT3
LOC400446
LRAP
DUSP19
BLZF1
TMEM90A
FOS
LOC643815
NTN3
B3GNT8
LOC730060
TNFSF14
CSF2RA
LOC100133772
RN7SK
BMS1P5
LOC642947
SYPL1
LOC728620
ZNF738
ZNF223
FAM119A
LOC389517
CLDN14
LOC647456
LOC100133233
HHLA3
LOC441087
LOC643161
N4BP2
ANKRD30B
LOC100134868
FGL1
LOC100128098
CALN1
LOC100128062
IL18
ROM1
SLC35E1
WBP5
ICA1
CYCSL1
LOC100130663
GABPB2
KCNH6
LOC643206
C21orf55
ICAM4
IRX1
LOC401098
XPNPEP3
LOC441958
LOC646135
TRPV1
LILRB3
KRAS
AVPR2
DUSP13
LRRC37B2
GPC6
DAPP1
TP53I11
IL1RN
C9orf130
CLRN1
LOC729423
NPNT
LEP
FCGR3B
DCAF4L1
TRK1
LOC100127937
RAB4B
LOC100133607
GGA1
XPA
XRCC2
LOC645955
MDS1
VPS41
RN7SL1
WDR74
AADACL1
C14orf174
SNORD52
LOC644642
LOC100131989
ZBTB7A
CPM
CEP27
CCR6
LOC651777
BACE1
SMEK1
LOC643479
LOC728809
SCN3B
ZNF563
L3MBTL2
CTGF
BBC3
LOC646936
LOC728262
LOC647993
ZFAND2A
LOC729324
SH2D5
PABPC5
FAM153B
LSG1
MSH3
RASSF5
LOC727833
TBC1D3F
LOC100134364
SC4MOL
C4orf34
HSPC268
FAM10A7
SPRR1A
FARSLB
LOC400721
LOC647987
DEM1
AATK
NDUFAF3
MAFF
RNU1G2
LOC283711
SAMD11
LOC440704
MGC16703
LOC100133600
DGCR11
TTC32
LOC729081
BCYRN1
TES
GAS1
LOC400743
GRIPAP1
LOC646278
LOC100131061
ENTPD3
RNU1-5
GTSE1
GGT3P
FKBP14
SPATC1
C19orf10
PDCD7
RGS2
CHRNA5
PTPLAD2
MIR1185-1
RFK
KCNJ4
XIST
DNAJA4
ZFYVE27
LOC652427
PDCD4
FOSB
CXorf64
SLC26A6
LOC648705
LACTB
LOC100134436
DUSP15
HMGA1
RNU1-3
IER2
LOC728416
CLDN4
RPL7L1
IFI27
TMEM191A
LOC100133649
LOC391169
MPZ
C19orf54
NEO1
LRP12
ZNF557
HINT3
IER5
STAG2
SHROOM4
EMX2OS
SUSD5
SLC25A25
IL21R
C17orf101
NFIC
HSPB1
SCARNA10
LARP4
QRFPR
DUSP27
DEAF1
FLJ31306
TMEM207
LOC653635
STRN
MIR1978
TMEM84
SNHG11
ZNF358
RNF40
HSPBL2
NPY5R
LOC730993
ETV2
LOC100132213
SUV420H2
LRRFIP1
LOC651816
RASSF6
HYDIN
DTWD2
LOC646021
FAM115A
RNF152
MIR29B1
ART1
C5orf27
SOAT2
TMEM17
FBXW7
LOC100131673
KIAA1324L
CFI
FLJ44450
SAMD14
LOC730990
LOC727808
KRT6B
LOC100132767
PCTK3
ZNF549
KLHL28
LOC729439
SYAP1
SALL4
LOC649305
OCIAD1
ROCK2
USP49
SNAPC1
ZNF473
ORC6L
LOC100133876
LOC391334
NEURL1B
ATP10A
WAPAL
TRDN
METRNL
LOC554206
HOXC13
ID2
MSL3
MAP2K6
C21orf67
TDG
SLC26A2
IKZF2
RAN
DKFZp434K191
FZD7
GCET2
C14orf153
MLLT3
SREBF2
SMCP
ADAM15
LOC100131744
MAGT1
GRK5
MXD1
RNU1A3
ZNF674
RAB27A
RRP7B
ZXDC
FAM134C
RNU6ATAC
TRIB1
LOC654161
CREBL1
ARVCF
ACTRT1
PRAF2
WIPF2
SERPINH1
PRRT3
C17orf88
ATP1B3
RNU6-15
AKR1D1
LOC728312
LOC100133465
ITIH5
S100PBP
LOC401561
MYL6B
RFX5
LOC653162
ZNF69
LRBA
LOC649679
EFR3B
ZNF93
RHBDF2
LOC727869
LRG1
LOC146177
FEZ1
ZNF773
IQGAP2
PCDHB19P
LOC100132657
LMOD3
EPB41L4A
FKBP5
GNPNAT1
FLJ90086
C10orf58
PCBP2
SULT1A1
B4GALT7
C7orf27
KCNJ10
PLAA
FBXL11
SLC35C2
APPL1
ZNF524
NRK
ANGPTL4
FLJ36144
LOC650254
RASA4P
SHCBP1
LOC646034
LOC652628
TNFSF13B
DKKL1
C4orf23
DSCR5
RNU6-1
LAPTM4A
PRDM1
TTC23
FAM46A
LOC390671
LOC100131096
CAPS2
ZNF716
PSMD12
LOC643150
SNX22
JDP2
LOC100134083
PLA2G2D
PRSS7
LOC644162
FLJ40852
ZNF577
LOC646769
IL24
C1orf177
MIR300
C8orf48
LOC731049
IMPDH1
LOC163233
DOPEY2
LLGL1
LOC100131390
CACNG6
TRIM13
LOC100008589
PTP4A2
BID
MSL3L1
GSTTP2
HAPLN2
PSMC1
LOC100127913
LOC442582
LOC642082
FGF18
BRCA1
SUSD2
LOC100128476
LOC100129213
LOC400013
PA2G4P4
MAP3K3
PLDN
LOC100128510
LIN52
TGFB1I1
CUEDC1
PPFIBP1
CBX3
SERPINB6
PIGU
FRRS1
VAV1
OAS2
TRAPPC6B
ZNF600
PLXND1
ARID4B
KHSRP
ACSS3
C14orf82
SLC5A10
TACR2
USP48
PRO1853
LOC344167
TEX261
LOC729176
MYEF2
FLJ20397
FNIP2
FAM177A1
TCF7L2
MBD4
PPM1A
PRR15L
RN5S9
RAG1AP1
LOC100133888
FLJ38717
CACNA1D
LOC644075
COL8A2
APOF
P11
LOC645339
LOC654155
LOC652589
ALS2CR14
DEDD2
LOC728772
FZD10
MET
MMP10
LOC441251
IRX3
LOC100131894
AVP
SPRN
ATP6V0E2
LOC440509
SLC19A2
LOC100130598
SAPS1
FAM90A3
BST2
BCAN
SRM
RNY5
LOC151760
ANKRD22
LOC652627
DLX3
PHF17
FKBP4
LGALS8
ADAM21
LOC732146
EVPL
THOC2
FOXC1
C17orf51
OR9A4
LOC729259
FOXO4
LOC729533
MRPL53
TMBIM1
ATXN7L3
FLJ37396
LOC100134053
AQP7P2
RP11-49G10.8
LOC729530
OR56B1
SPRR2F
SETD5
AMOTL2
MAGEL2
ZNF624
C1orf88
DUSP5
HRES1
ASPHD1
LOC729142
DKFZP779L1853
LOC644101
LOC388397
NBR2
FAM63A
GDF11
NFATC3
PIK3R3
STARD3
PPP1R1B
MGC45491
TAS2R41
MIR345
VENTXP1
CPT1A
EYS
XKR6
C15orf48
S100A9
LOC100129720
TRMT61A
ZKSCAN3
ZNF638
SLCO3A1
LOC100130131
C9orf75
DLX1
GABRE
PPARD
PAPD5
ARVP6125
LOC100129522
C22orf30
ZNRF3
CLUL1
ZNF787
LOC642446
LOC641798
ASAH2C
C8orf55
A2BP1
SCYL1
B4GALT2
REXO1
DAZAP1
LOC442132
CGB5
LOC730392
LOC286467
OR11H1
LOC645078
LOC649174
ATF5
CCL5
HOXB6
JUN
RBM39
OSR2
LOC100132913
KIAA1285
RRAD
LSAMP
LOC100131452
PHCA
UBC
LOC100133797
LPAR3
C11orf84
SLC22A18AS
LOC441151
PIK3C2B
ZNF483
HNRNPU
MKNK2
LOC728086
PAK2
SBF1
NFATC2IP
CBX6
MAGEH1
LOC100131733
HGF
SENP3
C11orf63
SGK
KCTD11
CD1E
C6orf170
LOC388925
GDF15
PFDN2
LOC653352
CIB2
PES1
LOC642815
MYO3B
ALAD
LOC645520
LOC647060
LOC647389
LOC653786
NY-REN-7
ADRA2B
ZNF713
LOC100134188
ARID3B
SLPI
PPAP2C
LOC100133823
USF2
ALDH4A1
LOC645233
C17orf71
KIAA1530
CDH24
LOC653463
LOC728908
S100P
SERPINB2
HOXD11
SYT3
LOC654203
LOC648390
PKN1
UGT1A3
SAA1
NFKBIB
TRIM43
GPS1
KIAA0101
LOC643355
ZCCHC3
C19orf26
CADM4
TCEB1P3
HMG20B
AGTR2
IP6K3
MIR1229
ZNF786
ENTPD8
C10orf128
RC3H1
ALB
RPS6KL1
AP3S2
MUC16
JAGN1
MIR639
LOC100132593
HOXC6
SIVA
RNASE7
LOC650840
LOC100131541
LOC100130818
IFI35
FZR1
ADPRH
LOC649584
AMT
LOC643008
LOC338758
LOC644291
SNHG7
PHF2
QSOX1
CALR
LOC647089
ISM1
LOC100131721
TSSC4
DTX1
CRHR1
MIR1974
LOC644852
WASH1
KIF2C
ARHGEF1
PVRL1
CXXC5
EVI5
CFH
SCARNA9L
LOC100133298
YRDC
LOC150759
SDCCAG3L
ZNF777
LOC441009
CRABP2
HIST2H2AA3
FLNA
NCOA3
LY6E
GCLM
SNORD84
ASS1
ULK2
LOC442041
PHF13
SCRIB
RNF213
CHPF
UBE2G2
CARD11
LOC390669
C9orf169
ACTA1
LOC100132774
LOC100128528
MBOAT2
MYBL2
ASB2
HNRNPK
LOC196752
LOC642377
CYP26A1
IFI6
IFITM1
NFAT5
PHF19
IL18BP
IKZF3
HLA-B
STAG3L3
LOC100134796
RNU1F1
HRB
HACE1
RSPO2
GCN1L1
ZNF766
UNC5A
KIAA0495
MBOAT7
TCAM1
VASN
GPRC5A
LYPD3
NACA2
RGN
MFSD11
LOC730841
DBT
ATG4D
PGRMC2
ITPRIPL1
TRIM9
ALG3
CDKN2C
MAP1LC3C
SH3KBP1
C2orf44
INTS1
PPARBP
PTPN5
KRT81
SNORA68
LHB
LOC723805
FLJ22675
LOC100130562
HEY1
NUDT1
LOC100129539
FLNC
SP1
LOC728229
GRINA
LOC374395
CD79A
CDC2L5
CGB1
DKFZp686E2433
TRUB2
LOC643802
EIF6
LOC441066
TCP1
CPSF1
FLJ45256
SNORA57
OR10J1
FLJ20581
MOS
GOLGA7B
LOC729519
LOC100132829
LOC161527
TRIM41
LOC441957
UBE2L3
ZFP57
UBTD2
C6orf138
LOC643905
HMOX1
LOC731718
SNORA58
AMAC1L3
GMEB2
HSP90AB1
PLD4
LOC344328
IFITM2
KLHL8
ITGA5
GTF2IRD1
RAB13
OR2T33
C1orf113
LOC100129466
RDH11
NR2F1
HIST2H2BE
LOC731231
LOC100128918
RPS6KA1
IQGAP3
DLL1
TRIM36
DHX9
TAF13
HYOU1
TMEM35
PTGS2
LOC642033
LOC649661
MIR561
LOC100134282
FOSL2
TFAP2A
ATN1
TGDS
LOC100134393
LOC643612
LOC728889
MGC16121
ERVWE1
COL6A1
CEPT1
LDB1
LOC646869
C19orf6
APOBEC3C
CCNT2
LOC731640
LRP10
LOC100129295
LOC652699
TRIM45
CADPS
FLJ10374
LOC388564
B4GALT1
STIM2
SEC22C
LOC729417
CAPN6
TOP3A
KAT2A
C1QA
LOC647520
ZBTB3
CROCC
KIAA1958
SHC2
RAB11FIP3
LOC100132474
SPRR2D
SOCS3
CFLAR
TPD52L2
LOC649897
EIF2AK4
FAM83F
CRIPAK
SMAD7
UCRC
LOC651979
KDSR
ATP2A3
DSCR10
FREQ
HEXIM1
CACNA1S
NAG18
CHRNG
MTRF1L
PCSK1N
LOC730877
TAGLN3
LOC100132826
ZNF653
SGK1
SLC6A7
LOC728534
AMAC1L2
FAM89B
GJC2
ECGF1
CCR2
HSP90AB2P
SAA4
LOC283392
LOC100130092
FLJ34503
AJAP1
BSPH1
LOC400879
PGBD5
LOC645334
CCHCR1
LOC646753
PGAM5
WFDC2
VPS18
N4BP2L2
SEPT6
FST
TARBP2
LOC644949
ZNF784
KATNB1
LOC728615
ADAM2
PLLP
IL5RA
ROR1
CCNI2
FOXO3
LOC641802
NOTCH1
OAS1
MAP1LC3B
IL23A
RALGDS
VHL
FERMT3
WDR65
TRAPPC6A
DMD
SAPS2
C2orf71
HSPE1
LOC100128547
CXCL16
S100A8
CELSR2
FARSA
LOC651212
RBBP4
ATP1A1
RPUSD1
PIGV
KCNK3
MIR373
SNORA80
KCNRG
LOC643475
NCDN
MIER2
KIAA1026
SIGIRR
IL2RB
LOC644012
EGOT
BRI3P1
PPP2R4
FAM75B
EVI1
PLK1
GPM6A
IFT88
LOC100132394
FAM133B
LOC645904
LOC641939
CSF3
TMEM222
LOC728779
LOC727899
COL18A1
LOC653580
CCR5
C14orf102
SMG5
CNNM3
UBE3A
LOC641819
LOC100131565
CDH23
PSENEN
HIPK2
LLPH
ARFGAP2
C10orf116
LOC653941
PSMD8
FBLIM1
ZYX
SYTL2
RPP14
TSPAN9
AGRN
TICAM1
GFRA1
TMEM39B
LOC148430
ZFYVE16
RAXL1
LOC643501
LOC100129654
PLCD3
PRKX
AKT1
DSCR4
DSCAM
HIVEP3
TOM1L2
CXCL3
TSPYL6
CES7
DNAJB2
GNPTG
LRRC41
LOC650832
LOC606724
LOC653073
LOC647834
GRB14
LOC653143
MAFG
LOC641365
LOC649990
CHCHD10
ATAD3A
DUSP8
LOC642003
FLAD1
PI3
ACSL5
NFKBIA
RAET1G
LOC643932
LOC645254
IL1R2
DNAJC2
KRT17
UGCGL1
IFFO1
LOC646703
RGS9
LOC651849
PLXNB1
LOC100130133
LOC646223
HRH1
FLJ20209
ID3
COX19
LOC654002
FAM72B
GARNL4
MAP7D1
NDUFC1
SH2D1A
OTUB1
FAM96B
URG4
SFXN5
NCSTN
LOC648751
TDRD1
LOC728686
BAT3
LOC100132513
LOC400713
LOC647135
LOC728275
LOC283767
SNORA67
B3GAT1
ITFG2
C20orf117
HSD17B8
IL11
FAM164A
CCDC26
LOC646746
TBL3
LOC389523
LOC100131009
PMCHL1
EED
MEX3A
LOC641943
PCDHAC2
MIR572
LOC388938
SOLH
XAGE1C
NCAN
SLC25A22
KCTD2
TULP3
NF2
NDRG2
TMEM99
TIRAP
LOC651515
LOC100132037
ADAM32
LOC653486
LOC388923
LOC651029
MGC40170
SAMD6
MFGE8
WNK3
PRRT2
LOC100130905
LRRC16A
C1orf125
MFI2
LOC642784
PFN3
NR2E1
DMAP1
SLC25A1
TUBB2A
LOC349114
CREBL2
HSP90AA1
INSR
LOC649580
SCAMP3
LOC729137
AGAP3
BTG4
TREM2
IFIT2
LOC100129707
ALOXE3
PLA2G5
FLJ40606
ZC3H3
MCOLN1
C16orf89
TMEM189
FXC1
LOC100131139
LOC645387
SNORA5B
SHF
PHAX
MARCH4
SNORD43
SNHG9
LTK
MIR340
VPS25
LOC648665
NT5DC2
KCNG1
TWF2
OR7G2
FKBP8
LMO4
LRCH4
SPRR2A
LOC642456
ZNF407
P2RX3
SEPT5
CD207
EIF4G1
LOC653696
CABP2
ZNF579
UPF2
DLX5
ZNF672
GADD45B
LOC653962
LOC645210
SNORA6
LOC728557
LOC645138
LOC730316
BAG4
LOC652640
TMEM137
DLX4
TAF6L
TAS1R2
KCNQ4
KIAA0947
TGIF2
DAB2
MAPK14
C19orf56
TMEM145
ODZ3
ENHO
CRIP1
AURKB
CCDC36
LOC647827
PTPRS
RPS28
OR52N2
TCHH
LCE1F
SOX4
SDC4
MMS19
NAGPA
MSL2
LOC646106
BARD1
LY6H
AAMP
PVR
FLJ23584
LOC401152
LOC390557
LOC390940
DNM2
ERI3
OSGEPL1
NUS1
RNASE10
KRT85
FLJ22184
LOC441811
ZNF227
OR2B2
CYP27C1
TMED1
FAM100B
UCKL1
LIMK2
CHMP1A
IGSF8
RAB11FIP1
PRRG4
ANXA2P2
ADRA2A
LOC650628
CYP1A1
ABTB2
CLDN15
LOC150207
MAG
HCP5
FLVCR1
TRPC5
PLXNA4
PRKAA1
SDAD1
LOC645312
XAGE1D
CCND2
TCEB1
BCL7C
IGFBP3
MTPN
KCTD17
HAS2
LOC729566
SLC7A3
C17orf49
LOC100131836
RABAC1
LOC729978
HK1
LOC646197
ARHGEF16
CYB561
LOC100131368
LOC646786
NLRP3
RNPC2
PAIP2
CDC25B
LOC650668
LOC100128440
LOC729858
MAPK8IP2
GUCA2B
FAM102A
LOC647488
LOC644143
CCDC96
SPANXB1
WDR42A
SEMA4G
RTN1
NMT1
F2R
LOC729681
HSPA5
BLCAP
LOC100130285
ABCG1
LOC387763
PTDSS2
HOXC8
LMAN1L
HAX1
LOC729260
RBM4B
MICB
SETD1A
MLLT6
LOC729692
LOC100131372
C1orf91
FUT3
ING4
LOC646783
WDR89
HSFYP1
STC2
LOC100133163
C19orf66
LOC100131311
LOC285205
LOC100127925
GATA3
C1orf74
SLC15A3
PYCR1
ALX1
LOC392437
HECTD3
GLIS3
CFB
RBCK1
OR4C15
GIT1
ZNF221
SPNS1
UNC13D
SNTB2
SLC39A13
ABCC9
LOC642769
WHSC1
OVOS
FUT6
TAOK2
SPC25
HCG4
PLOD3
SNX6
PAK4
VPS37B
LOC388503
REXO4
SDR16C5
LUZP1
ARSA
UXS1
GPR183
PDE6C
LOC642468
KCNK4
DUSP26
RNFT2
SLC39A3
OPA3
RBM41
EFCAB4A
MAPRE3
LAMB2
LOC100129291
VIPR1
LOC653184
LOC441896
UBE2D2
C15orf39
LOC648253
ITPRIP
KLF7
NELF
LOC100131831
AACSL
KCNAB2
MGC12760
MOSPD3
LOC100132266
MGC25181
TP53INP1
CDC42
C11orf20
INPP5F
LOC648403
PFKFB3
SAP130
ZP3
KIAA1274
LOC100133232
ZGPAT
LOC647363
IGFBP2
RARA
LOC729348
CASP14
LOC649456
OR4C12
LOC728285
LIG3
C3orf47
CHTF18
AP2M1
ADAMTS13
GCM1
SLC25A19
FAM153A
NDEL1
C9orf25
ATG2A
MYOM2
CITED2
LRRC4B
CTBP2
RAB43
SPRR2E
LOC648987
SEC61A1
KRT13
TIMM17B
RFX6
LOC653781
KIAA0194
MRPL18
ARHGEF10L
DIS3L2
LOC652783
TTYH3
FLJ44054
SGTB
LOC100131094
KIAA0664
LOC650659
NDP
LOC441081
EPHB4
CAST
ATP13A1
UBB
SSNA1
CHRNB2
OR2T12
LOC100132859
ICAM3
LOC100133612
IP6K1
LOC100133224
LOC100128822
FAM129B
ULK3
C3orf62
GSDMD
ULK1
LOC729279
FLRT3
PAQR5
IHPK3
NEK8
OR2H1
AP2A1
LOC652173
LOC653324
MATK
CRYGB
LOC100130883
ATP2B3
FZD1
CIAO1
ZFP36L1
LOC391073
CD276
GAS2L3
C19orf29
LSR
MAGI1
TSKU
LOC642916
LOC100128682
LOC650098
NUMA1
LOC647447
MGC40069
SDF2L1
LOC646348
AQP1
LOC440487
TNFSF12
LOC651859
DENR
MRPS26
LSM6
IQSEC3
INO80B
NTSR2
DUX4
ZDHHC18
CXorf42
SEMG1
KLHL14
NAPA
ZNF608
SIPA1
C7orf41
C14orf166B
LOC642804
DNASE1L1
ASNS
COL23A1
HIF1AN
UPK2
LOC652327
IL25
SPHK1
MIR514-2
TENC1
SLC25A45
MBL1P1
LOC401068
SNRNP70
OR2H2
SCAMP2
LOC644931
LSP1
ZC3H5
SHOX2
SUDS3
LOC651141
LOC650611
RFPL1
EMILIN2
G6PC3
STIP1
CDKN1A
C16orf57
ZNF639
BOK
SFT2D2
STAP2
PRAMEF10
S100A13
MSX1
RUNX1
FAM32A
PLP2
DDX27
MIR642
DCBLD1
GZMB
HSPH1
C21orf88
SNORD104
MAP2K3
SV2B
LOC100129882
UBXN10
KRT6A
GRB10
ATOX1
VGF
LOC650465
TBX18
TP63
C16orf47
ABCB9
FCN2
LOC283116
CA1
BCAS4
FLJ20021
ACTR1A
DPM2
TTLL1
BPY2
LOC644694
DDB1
ZNF419
C3orf72
LOC653567
LOC648103
RNF14
GCDH
U2AF1L4
CHKA
PCBD1
SPRED2
TFEC
LOC100134550
SH3BP5L
TOX4
EGR3
MBD3
TNFSF15
HRG
GCSH
LOC651100
NME3
WHAMM
GCC1
MIR7-2
MAGEC1
SNORA7B
IL1F9
TSPAN1
C1orf186
CCDC87
PIAS4
PSG4
CCDC35
C1orf87
LOC653701
LOC649722
LOC100133401
CRELD2
FMO2
SIX5
OR51A2
ZDHHC8
SLC35A2
POU2F3
LSMD1
LOC641978
HMGXB4
UNC93B1
NDUFA10
BCL2L12
DCLRE1C
HIST1H1B
HSD11B1L
SIT1
ZC3H18
LOC442113
CSNK1G2
UBN1
GEMIN7
C7orf38
NFIX
LOC100129716
TAX1BP3
NXF1
ZNF503
TOM1
LOC121792
FECH
DMWD
LOC731932
LOC730323
TRIB2
MMP3
TNKS2
LOC100130363
LOC440157
LOC100130701
P2RY12
HCCA2
LOC652551
SIM2
LOC642188
LOC653472
PCSK4
LOC654116
LOC643624
SPIN1
LOC651728
ZBTB22
LOC100133075
MRPL2
NOSIP
CYB561D1
STOML3
RASGRP2
PRMT2
LOC283932
CST6
C19orf31
LOC645574
PPAPDC3
LOC645038
UBE2J2
SNRNP200
SELS
SLC27A3
LOC644276
LOC728403
GPN3
C19orf34
LOC100131049
DDX19A
LIG4
LOC100129095
C10orf67
LOC399744
TWIST1
LOC642780
TFPT
ZNF205
LOC100130833
LOC399753
HLA-DRB1
DOK1
SAFB2
KIR3DL1
PNLDC1
LOC651073
ZBED1
OR10G8
RLN2
ZC3HAV1
NBPF9
SHISA4
C19orf53
KCNS1
LOC541472
LOC390424
DENND2C
TTC39B
NAP1L2
LOC388621
PMPCA
SNAPC4
LOC649044
TSPAN17
MORN5
LOC100131940
LOC644499
LOC729433
EVI2A
SFTPA1
RBM33
ZC3H12A
OR10T2
C14orf2
SRPK2
TSPAN33
DBNDD1
ECSCR
PRKCSH
LOC402679
CSNK1E
FYTTD1
GPR172A
LOC644620
DLC1
KLHDC4
LOC390705
FAM178A
OR4B1
SERPINE1
ZNF669
PLIN5
SETD2
LOC729964
PGAM4
LOC729500
RUNDC2C
IDH1
C21orf58
RPS14
LOC100132795
TARDBP
RPL26L1
ANKFY1
NCF1
TJP2
UBE2L6
LOC649548
EPHB2
AKR7A3
MORN2
CCT7
LOC202781
MTRR
C12orf57
MRPL20
RABGAP1
CRIM1
DEDD
C2orf69
CLCN1
TROVE2
DENND1A
CCDC25
ERMP1
DHRS11
LOC653874
PSMC4
TRIM24
GNL3
SPAG5
LOC727900
ALG2
BRF2
C21orf33
ALDOA
LOC440595
LOC649150
IGF1R
LOC648210
AZIN1
PEF1
WDR1
GTF2IP1
FASTKD1
PTPRF
TMEM14D
PDIA6
LOC650215
ACTG1
PSMD10
BIN1
LOC399942
CUL4B
LOC100133372
AP1S1
YWHAZ
MAT2B
CCNC
UHRF1BP1L
CHEK2
MATR3
SCP2
GNA12
LOC651064
[truncated: 2,299 more rows]

## Sheet: UROtsa
Table S4. The list of DGEs between C125E01 and WT.
SERPINE2
MARCH4
GDF15
TGM2
IER3
PHLDA1
ETV4
CTGF
TAGLN
UBE2E1
PI3
THBS1
MYEOV
C1QTNF1
TXNIP
AOX1
RN5S9
BIRC3
VTRNA1-1
CYR61
FLNB
LRIG1
DYNC1H1
AHNAK
HBEGF
HHAT
EMP1
LOC728253
IRAK2
TAOK1
SPINK6
GADD45A
PHLDA2
COTL1
HSPA6
ITGA2
ANTXR1
SPRY4
STS-1
HSPA1A
LOC399988
EPHA2
MT1A
CDC42BPA
MIR635
JAG1
IL7R
C9orf169
UBR4
HSPA4
TMEM166
ARHGDIB
TNFRSF12A
HKDC1
JUN
PLAC8
TNFRSF21
LOC645387
TRIO
TINAGL1
TXNDC5
CD55
C16orf57
ODC1
TSPAN1
TGFBR1
F3
TPM1
MT2A
FAT1
CRKRS
ANGPTL4
C8orf46
EGFR
ACTG2
ETV5
AKAP13
SERTAD4
C21orf58
C7orf54
LEPREL1
PAWR
TUBA3D
SDC4
LOC129870
TMEM156
CCDC8
PDGFB
SRGN
MAP7D1
AXL
PTGER4
ST8SIA4
ZFP106
FLJ20489
UGT2B15
KLHL28
NBPF8
SHROOM3
SCARNA27
MACF1
HIST1H2BD
ARNT2
PTPRF
ALDH1B1
PHF10
TMEM158
MBNL1
LOC728831
MANSC1
FLJ46361
USP9X
CDK6
HSPA8
VWC2
FNDC3B
COL12A1
IL6
FAM176A
SYNPO
P704P
CCRN4L
TRRAP
C19orf64
DLEU2
LOC100128084
PANX2
CDC42EP2
ITGA1
RDH10
PAPPA
LOC100131431
NT5DC4
TUBA1A
SERPINB8
SH2D2A
TMEM2
TLN2
TRIM13
UNC84B
ANKRD1
TMEM137
PPP2CB
LOC731282
MIR557
C10orf91
GKN2
LOC648123
RIN1
LOC643879
OGFRL1
KRT7
RAD54L2
SLCO4A1
GNPTAB
LOC650796
VDR
GKN1
TUBB4Q
SLC40A1
NUAK2
LOC650832
ELFN2
CDK2AP2
EBI3
LOC100129828
LOC649679
RASD1
EP400
POGZ
OR5AU1
ACTN1
GPRC5A
SEMA3E
C20orf85
ASNS
ALS2CR16
ZFP36L1
NLRP8
PILRA
LOC645971
MLL
CACNA1G
IGSF3
PSMC3IP
ACOT7
POP1
GSTM3
GRIK1
LOC100128505
LOC650427
PYGB
LOC643648
TRAK2
MIR508
MDN1
TTTY14
ANKRD56
LRP5
NFKB2
LOC100133714
HIATL2
RRP9
GPR126
LIMA1
LOC100133985
CYP51A1
KRT14
LOC645638
SEC14L1
TEX13A
RUSC2
FAM178B
SLC7A2
LACTB
LOC100133758
TSPAN14
DLEU1
TRIM34
LOC100133598
ICAM1
SLC35F3
DEFA1B
GNG2
LOC653543
NUAK1
KIAA1751
C1orf86
DCBLD2
BCL2L1
TMEM1
MAP2K3
YRDC
LOC100132727
RECK
C21orf29
PATE3
STK24
LOC100131820
OKL38
LOC729770
FRMD6
DOCK10
PES1
C1orf87
BRI3BP
UGP2
CYP2C18
TM4SF19
BCYRN1
LOC642771
NBPF3
REG3G
PTRF
FCAR
GRAMD1B
IGF2R
KRT34
LRRC37B
LOC653748
MTE
SGMS2
FRS2
C6orf10
LOC643345
KRT81
LAMB1
MRPL33
TUBB2A
LOC653489
UBFD1
POLG
VSTM1
SNORD44
LOC649299
LOC100132493
NPC1
LOC653877
SPINK1
NTN4
ALOX15B
LOC85389
PEX12
TSPAN8
ATF5
CHI3L1
STAG3L2
ECE2
UBIAD1
MIR582
TESC
DHX38
LOC644634
MAPKAP1
PRR3
LOC643566
LOC644738
LOC653380
PTPN11
UBE4B
PGAM5
MYCBP2
SYNPR
BIRC1
MAOA
OR13C8
TXN2
PALLD
LOC731670
ROR1
C7orf28A
DSCAM
LOC100130764
CR1
RPL9
LOC728103
PROKR1
ITGB1BP3
ABCG1
ATP1B1
ACOX2
LOC100129417
LOC652396
SVEP1
RAB6B
ARRB1
ACOT9
RERE
LOC151760
LOC642018
GLT25D1
TTC24
SLC16A9
LOC727927
C21orf99
SLC12A2
LOC645797
ACLY
CERK
LOC728919
C2CD2
DCHS2
MLKL
C10orf113
LOC100128062
SLC4A7
TTLL11
ADRB2
CCNE1
TXNRD1
TIAL1
WDR74
IL18
LOC100128404
SH3RF2
RNY1
KIF1C
HIF1A
TNFRSF10A
PCYT2
ADRA1A
LOC442474
TNF
MYH9
GRK7
DYRK3
POTED
STARD13
NQO1
LOC100129095
HRH1
MIR10A
PAGE2B
MGMT
KCNK10
CPLX1
GEMIN5
SYNPO2L
LOC643161
SPANXB2
LOC131909
FAM90A5
C3orf31
TBC1D14
SELI
LOC392583
TLR6
TPI1
KLC2
CRYZL1
PLA2G2D
LOC644019
MIXL1
FUZ
FLNA
LOC400743
C10orf54
OCIAD1
TRIM9
KLF6
CPA4
LASP1
CHST4
FAM129B
DHRS2
ZZEF1
CHRM2
TMPRSS6
FGF17
LOC642784
FAM73A
LOC644591
DOCK5
CCK
IVNS1ABP
LOC100128440
TGFB2
TMSL3
LOC728343
LOC202134
GALNTL5
ANKRD30B
HYDIN
FAM90A6P
APC2
LOC642110
CCDC54
SMG1
SEMA3F
SLC45A3
LOC732424
LOC441009
ADAM21P
ZNF141
CCL2
SPTBN1
BMP6
SNORA11D
DGKI
LOC389631
LOC100130102
IGFBP3
RPL34
LOC100132386
PTGFRN
ATP2A2
CHST12
FAM19A2
OR5AR1
BIRC6
LOC646615
FOSL1
SLC28A1
IKBKE
GAD1
PITRM1
MCM8
SLC48A1
FTSJ2
POM121L1P
UNQ9370
FGFRL1
LOC645450
ACR
OR1N1
ANKH
PSEN2
ABAT
KRT80
EPHB2
SGPP2
VAX1
BOLA2
KCNIP3
OR14A16
BAK1
CSNK2A1P
LOC644813
LOC642121
NEUROD6
MUC6
ITGA5
LOC100130516
LOC730031
PTH1R
SLC25A19
TLL2
RNF121
RIMS1
FAM86A
GNA12
IMPAD1
LOC727821
KATNAL1
YIPF5
LOC730032
KCNE4
LOC653353
MSI2
ERCC6
RGS2
GMPPA
STAG3L3
LOC642622
KIR3DX1
LOC730908
SNX3
LOC653264
FLJ32252
CTTNBP2NL
LOC646888
GLS
RND3
LOC131055
CCDC83
LOC653712
NRG3
PLK2
SIPA1
TPD52L2
HTRA4
UAP1
LOC654335
BRAP
LOC728499
HYI
LOC650005
PRKDC
BUB1B
S100A13
LOC645196
WISP3
C9orf167
ZSCAN12L1
ZNF37A
CHD7
GPR56
LOC729373
KIAA1644
CEP63
NME7
OAS1
DIP2B
PVR
USP7
PLA2G3
RGNEF
GLUL
DLGAP4
C12orf51
SLC16A12
LOC389842
GCNT2
STMN2
NEDD4
FAM86B1
NACC2
LOC645453
TULP4
LOC649191
DCP2
KRTAP12-1
CLIC4
LYAR
SMEK2
CTPS
RNY4
OR51S1
LOC728991
C9orf131
SNORD34
CYSLTR1
LOC100129362
NT5E
ELOVL1
PNMA5
DSCR8
STX1A
CRELD1
LOC100129376
LOC648790
BATF
TEX101
PLXNA2
ZNF826
ENTPD7
LOC732443
C15orf44
LOC100133994
FBXL18
LOC441548
GSK3B
DRAM1
LETM1
MIR379
RHOBTB2
SCN1B
PTGES
ALLC
CD79A
LOC100134182
LOC100133669
DIP2A
XPO4
NBPF20
AREGB
SERPINH1
FBN2
CUL4A
TMEM182
LOC100134322
BRP44
TRPM2
LOC729966
LOC100128274
CCND1
LOC440225
LOC100128105
LOC647131
LOC645208
PDE5A
LOC650253
EFEMP1
PFKP
CBL
CXCL2
MPZL2
MYL9
MADCAM1
OR51B5
LOC100128337
ERLIN2
CXorf30
LOC100133430
RRS1
BNC2
EXOG
SPRR2F
DTWD2
ANXA6
ANXA2
PTPN2
LARP1B
DPH3
LOC100132598
LOC100130824
HIST1H2BK
IL19
NTN5
TMEM50B
LOC100128410
MGC13057
AMIGO1
PPIL2
AGAP3
EGR4
INO80D
LOC441442
TREML1
MIR193B
CCR2
FLJ27354
INPP4B
LOC654000
ATP2A1
LOC644010
TIE1
REPS2
DICER1
HIVEP1
CHMP7
LOC100130520
FIBP
GALR2
LOC642938
LOC653889
CREB1
ASAP1
C10orf108
MIR563
LOC729439
COL5A3
STX16
ENOX2
WWC1
GLCE
ANXA1
ZNF423
LOC389730
ZNF549
ARMC9
S100A16
LOC653527
LOC390557
TMEM201
PGM3
LOC100131093
LOC644710
NSDHL
NOX3
LOC646786
IMPDH1
MEI1
MYCBP
F12
ZCCHC14
RASA1
PDE8A
LOC401433
ITGA3
PDCD11
RIPK4
FAM108C1
FAM92A3
NOP2
LOC652721
LOC647862
PLEKHA6
LOC100128266
TSEN2
DNAJB1
PSME3
LOC644684
C4orf51
SMAD3
GFPT1
NF1
NBPF10
SLC30A5
AMY1B
C2orf69
LOC644037
LPP
LOC653397
ASCL1
MGAT2
LOC390407
URB1
LOC100129726
LOC645363
STAT5A
FGD6
WDR69
SNORA74A
LZTS1
CSE1L
KRT18P26
ANKRD34B
ANGPTL6
SERTAD1
GCH1
LOC729195
AKR7L
MPZL1
LOC643234
LOC727858
L3MBTL
OR1A2
CDH26
BOLA3
LOC100131655
ID1
LOC652753
LOC652203
THEX1
MIR219-2
ZDHHC5
LOC642140
SPINK5
SLC29A1
LOC100130325
CHADL
DSG4
SLC20A1
MIRLET7C
ARSJ
PLOD2
ERCC-00164
HELZ
SAFB2
C14orf139
MLL3
GBF1
WFS1
NFKBIE
ITIH4
UBR2
LOC100133005
TMEM167A
POM121L4P
UTRN
DMD
LOC644068
RNF160
HCG2P7
LOC100128435
LOC644286
CBY3
PITX2
HUWE1
PARVB
ORMDL2
C14orf138
FKBP14
MRPL10
TTC12
LOC644899
LOC728557
RPAP1
RELT
LOC649858
TOMM70A
FGFR4
C2CD4B
EPDR1
CILP
ANXA2P1
LOC643959
C10orf59
LOC649707
LOC100129002
FOXD4L4
GFOD2
CYP4Z1
KCNN3
DNAJB4
ZFHX3
SLC25A37
TIMP3
EED
LOC340113
LOC730105
RBMY2FP
TJP2
OR7E156P
GPR97
LMAN2L
LOC731751
LOC645048
TMEM16D
IGFBP1
ASPA
LEF1
PPFIBP1
TUBB2C
LOC100132585
FAM153A
LOC729346
LRRC44
MIR629
FERMT1
NSL1
TXNDC15
PLEKHG4
BAX
CD1E
CLDN14
ARMCX2
CCT4
GRIP2
MIR1205
KIAA0090
TTLL12
LOC100132247
OR2W5
LOC100132678
CCNI2
TBL1X
LOC729978
ABHD5
LOC653539
GNB3
PCDHA3
LOC100133447
DNASE2B
FLJ38379
LOC730474
PREB
CNKSR3
KIAA0460
LOC100128288
MIR1913
XPO6
SLC16A2
LOC642759
LONRF3
C12orf63
DEF8
LOC100049716
TMEM181
VAPA
OR52E6
NEDD9
UCHL3
PPAP2A
HMGB4
LOC100130367
PCBP4
LOC145845
GJB3
PRR5
LOC650455
MGC24103
PTPRT
TMPRSS11B
LOC642372
TMEM17
SLC17A1
LOC644884
HPS5
PNN
PHAX
CYorf14
RHOJ
MBOAT2
SLC7A3
LOC100134728
CFP
ZMYM3
LOC100133233
CCDC46
NPL
DAB2IP
MYO10
LOC650014
LOC100131403
C12orf56
SMAGP
PDE6C
SPRED1
LOC648758
GNG12
RPS19BP1
OMD
BVES
CA1
MIR647
CT47A7
MTMR8
LOC100134868
LOC729435
LOC651131
CNOT6L
LOC645188
FNBP1
CA3
WDR77
LOC654046
NBAS
MAP4
SLAIN2
LOC100133516
LOC729298
LOC729704
KIF21B
ZNRD1
LOC285296
POLR1C
LRAP
ARMET
LOC440895
LOC649143
TPK1
GPR156
LOC100129448
FAM55A
NR0B2
SH2D3A
LOC730861
BIRC5
CCBE1
EML1
LOC100133435
ADAMDEC1
ABCA2
CMPK1
LOC653820
HMGXB4
C21orf91
LIPA
OR2G3
TMEM30A
ANKRD11
EI24
LYPLA2
HSPE1
CORO1C
LOC643231
C1orf88
TRIM16
FOXRED2
MYO3B
TGFBR2
LOC647037
FSCN1
TMCC3
EPB41L3
LOC727732
LHX3
FLJ22662
ABHD2
LOC642733
GOLGA6B
AIM1L
KERA
BLZF1
WNT5A
AKR1B1
COL16A1
WFDC3
GYG2
SLC16A6
PCBP3
GRPEL1
LOC401923
PGM2L1
ATP11C
TXLNB
OR51D1
ANKRD55
LOC100132116
LOC338579
C6orf208
TESSP5
ADAMTS17
CSTA
CHD8
ARRDC2
KRTAP23-1
GPX2
PLXDC2
MATK
SRGAP1
MIR921
MIR92A2
SPDYE1
LOC100128783
VPS37A
FCGR3A
PDLIM7
NHEDC1
C21orf41
GSTT2
TMEM50A
SLCO1B3
LOC730038
SLC23A3
NNT
CD68
LNPEP
ANXA3
SLC23A1
NFATC3
REG1A
TUBA4A
HSPA12A
ACVR1B
LOC643621
CYLD
TMEM5
CSNK1G1
LOC100130905
DAPP1
LOC440731
LOC646449
FAR1
KCNQ1DN
LOC401098
FLJ41423
PRPF4B
TUBB3
LOC100132475
LOC100129808
ACVRL1
AIF1
FLJ41327
SIRPB2
NLRP7
ERCC5
SNORA67
KIAA1026
MIR1266
PLAG1
SLC22A12
CACNB4
DAAM1
NEXN
GOLGA3
LOC100133264
LOC645966
LOC728467
LOC654103
MIR1978
LOC100133607
KCNK6
FRG1B
LYSMD1
OAS2
MIR1228
OR1S2
TNC
LOC100128010
LOC100131836
HIF3A
LOC728379
LOC647960
HSPC111
LOC646183
LOC651116
LOC646438
LOC100132296
DST
LOC100134406
FAM71A
LOC100132593
MPST
SDC1
DEPDC1
LOC400942
ZNF430
CLTB
LOC652234
UMPS
SERPINE1
LOC729964
SETD2
PODXL
RNU4-1
SREBF1
LOC100008589
LOC100132394
HRASLS2
LOC100134364
FOS
SVOPL
CFB
CACNB2
RARRES3
DRD1IP
NFE2
CRYAB
WARS
LMO1
GPNMB
LOC650517
PCSK1
LGSN
NFIL3
CTH
CXCR7
MYLK3
BPNT1
ADSSL1
NCCRP1
ID2
PLCG2
OASL
NUCKS1
FHL1
LOC148430
ENO3
SAMD11
MLXIPL
MYLIP
MUC1
PSG5
DKFZp761E198
HPD
CLDN7
IL1B
RAB20
LPCAT3
ACE2
LOC729852
SNORD3A
RNF182
GDPD3
RORC
ECEL1
HEATR3
CKMT1A
RPS29
CA11
HSPB3
NR4A2
SNAI2
UBA7
HEY1
LOC647485
GAA
LOC100134743
TMOD1
SLC12A3
SCPEP1
ODF3B
CLCNKA
CHST13
DDX60
SGCA
ATP8B2
ACCS
SNORD3C
FLJ35258
TSHZ2
C14orf126
DDIT3
FABP3
LOC341230
CHRD
IL11RA
BCKDHB
TJP3
RPL13A
VIT
CNFN
VTN
LOC100130311
TNFRSF8
GRM4
FBLN2
WDR44
HIAT1
SAR1A
CECR4
INHA
RAD21
STEAP4
AQP3
BIK
MAP2K6
MIR18B
ZNF467
OLFML2A
HDC
FBLN1
LOC649970
ALPI
IFITM1
ACSF2
LOC730358
FLJ11235
APOL3
PMP22
PARP9
RNASE4
LHPP
SMPDL3B
PSG4
ASB9
C21orf57
TNFSF10
C18orf56
KLF4
RNU4-2
LOC387825
TYSND1
AKAP7
ROR2
LOC652330
MSLN
IRF2BP2
VAV3
INHBE
ANKRD10
KCNJ15
C1R
PSMB9
TMEM149
HNRNPA3
C10orf27
CHEK2
DLX3
MCF2L
SPAG5
SSBP3
C4BPA
MACROD1
SAG
CASP9
KIF15
MAP3K8
C9orf85
FAM83A
CRBN
LOC643402
ST5
DUSP2
AMPD2
SLC3A2
PLAC2
LOC654230
CTSF
LOC100132564
BMP2
ADAMTSL4
NCAM2
LMO4
VEPH1
RTP4
BANP
PAPLN
LOC646424
HDAC6
NUP43
SLCO3A1
PIGA
NRIP3
LOC645726
GTPBP2
LOC100131551
CSAG3A
RASL11A
SDR39U1
SERPINA5
PRG2
H1F0
APLP1
MARVELD1
HLA-H
SERPINI1
SLC2A13
TLE2
LOC284297
LOC284023
NCRNA00092
DPM3
MIR1909
C6orf150
LOC100130828
USH1C
LOC730179
MAP3K12
CFD
SH3BP1
LOC392871
BMF
PTTG2
SV2B
JCLN
PLEKHA4
LOC388279
DAPK2
HSD17B8
AK5
POLR2J4
XAGE1
FLJ20920
PPP1R3C
ZNF362
CDKL5
LOC653560
LOC646566
NCRNA00153
ADAMTSL2
THOC4
AGXT2L1
LOC645553
SGSH
TARP
LOC649757
DISP1
LOC645737
CTF1
JMJD7
HAUS5
TAF13
GALT
DHRS11
PRPH
WISP2
FOXR1
RMRP
RBM3
ACOT1
SHBG
PRODH
HBP1
LOC729926
CAPN9
LOC100129231
HLA-E
PPP2R3A
PLCZ1
LOC731658
LOC100133511
DNAJC12
COQ10A
CYorf15B
ANG
LOC100132060
PCDHGA11
OR11H12
TP53INP2
STOM
GSN
LOC646254
LOC728290
LOC647910
LOC653441
DLAT
LOC402644
LOC641931
COL1A1
RBBP9
PSMB10
CD164L2
LOC729327
NDUFA4L2
SILV
LOC729826
CCDC71
SNCA
SCYL1BP1
BAG1
COL4A6
C1orf113
KCNJ2
C8orf40
RHOQ
ALDH4A1
HLA-DMA
FAM111A
RPS9
DEDD
PDP2
PLEKHA2
ART5
TIA1
SSX1
ZNF580
NPR3
C19orf28
PCOLCE
PFKFB2
HLA-A29.1
ALPP
C14orf147
LOC153684
PGBD4
LOC653492
PRKAR2A
RNF125
FAM21A
RFPL3S
SLC30A3
GCHFR
PAX6
UBE2V2
MIR520H
LOC651429
FANCE
BCL6
LIN54
LOC401622
SPAG9
LOC729500
CNNM2
RAB26
ADPRHL1
C8ORFK36
LOC100133012
SERPINA6
MIR551A
DSEL
C1orf54
RBBP7
MYCT1
CTSB
USP6
AUH
YPEL5
SLC25A1
MIR624
CBX4
MIR548I4
ASAP3
MIR153-1
SLC6A9
LOC100133489
RPL28
ELSPBP1
HOXD11
ANGPTL2
LOC401648
KIAA1024L
TPD52L1
C4orf36
DDIT4
EGFLAM
DDR1
H6PD
FBXO43
MAP7
ZFP28
BNIP3
SPINK4
ERGIC3
PCK2
KCNV2
ZNF790
GUSBL1
LOC100129027
KIAA0513
GCA
LARP7
CAMK2N1
FOXO6
LOC100129969
NUDCD2
CTSL2
LTC4S
MYL1
LOC648210
BPHL
FBXO24
GABRA3
PSG3
ZNF253
IFITM3
C1RL
PSENEN
LANCL1
LOC441150
LOC440356
LOC641772
IFT80
CTSA
PRCP
TRIM26
FBXO4
TRAPPC6A
FBXO30
BBS1
LOC554207
FAAH2
C6orf62
LOC100131332
LACTB2
GRIK2
CD19
ETS2
C10orf75
LOC100129195
PRDX2
ZNRF3
LRRC30
DLX4
MN1
TARDBP
ARSD
RHBDD2
PRSS21
LOC100131320
LETMD1
IFRD1
STS
LOC728014
COG5
LOC642144
OPLAH
LOC100132767
KRTAP5-11
ITGB3BP
CETP
COX19
PBXIP1
MCM4
LOC643634
EPC2
LRRC48
ASS1
KIAA1407
FBXO2
C2orf88
LOC439953
FBXO34
MARVELD3
LOC100134032
LOC641995
ITGAX
LOC645336
LOC100128326
LOC339483
VHL
PCID2
CDH10
NKD2
SIRT2
CREG2
LOC653980
DHRS7C
ACSL5
WSB1
INSIG1
PRSSL1
LOC647911
C20orf112
TCFL5
DENND5B
MAPK3
LOC641738
C1QL1
RPN2
ZNF728
SMOX
PGAM4
ADAM23
IL18BP
KIF27
HCFC1R1
PCDHGA10
LOC644852
PGCP
ACYP2
SHROOM1
SH3BGRL
DMPK
NFKBIL1
GABRR1
LOC440804
LOC644760
APOBEC3B
KIF18B
COPG2
FGA
LOC441179
SCARNA14
CTNNBIP1
LAMB3
KIAA0888
BAIAP2
LOC729032
GLT1D1
MAPK4
GPRC5C
LOC641978
CLU
EPB41L4B
LOC642989
C20orf71
LOC652163
DIXDC1
LOC653189
RPS6P1
LOC728241
AQP7P2
SELENBP1
HK2
LOC285588
SLC15A3
HLA-DMB
LOC100134099
PLD3
CA9
LOC440261
LOC340274
LOC645586
LOC729815
GAK
LAMB2
GTF2IRD2P
C19orf20
FLJ13305
MTRR
ZFX
SNORD13
LOC339192
XPC
OR5AK2
LOC100131360
KCTD2
BHLHB2
XKR8
CNTN1
LOC653297
CLCNKB
LIN28
PEX11G
TEX264
LOC728607
LOC651404
LOC100130174
C6orf108
C19orf66
LOC729660
GLCCI1
KLF2
CYB5D2
C11orf54
LYRM5
HSPBAP1
C12orf57
ATN1
MC1R
FBXW4
HISPPD2A
MPND
SRGAP3
LOC100133178
DHRS1
SLC6A3
INTS6
FLYWCH2
WTAP
C15orf27
FAM124A
IP6K2
MCCC1
LOC643720
NAGLU
DAAM2
TMEM59
CPNE8
C17orf100
LOC642558
C21orf34
IFT81
PDE4B
LOC440015
LOC100129267
FLJ36144
LOC731231
C13orf7
NFATC2IP
ORAI3
MSRB2
TAP2
ST3GAL5
C7orf51
C11orf49
CENPH
SOX11
RFC3
TRIM45
LOC100132306
ST14
FAM90A7
MAFB
OXA1L
PDZK1
BCAS4
KIAA0101
TNRC6B
MXRA7
SP7
LOC647138
C3orf71
CCPG1
CCBP2
LOC728323
DKFZp779B1634
ADAP1
BNIP3L
CKMT1B
BCKDHA
ZNF446
CLK1
CSTF3
SEMA6D
LOC100128327
C11orf58
LOC728635
ALAD
LOC727797
GPC5
ITPKA
LOC729193
C5orf41
TCEA2
CTBP2
SERPING1
SPC24
C8orf48
WDR60
C21orf33
RHOB
LOC642684
DLG3
FBXO44
RNASE1
C16orf75
DDX17
ELF2
TUB
CAT
AGAP2
LOC729021
ZFAND6
EXD3
TRH
MIR147
KRT17P3
USF2
CD302
MIR651
NAV2
PRKAG1
LOC402112
TSPAN11
AGER
ZNF257
RNF113A
ITM2B
FOXO4
LOC651772
ACSL3
MBOAT1
LOC100130880
OR52A5
CITED2
LOC100133450
MUTYH
LOC650751
OIT3
REXO1L5P
ADM
KRT3
LOC653879
IFIT3
MT1F
NAGA
LOC121952
LOC728737
LOC650538
IDH2
CRIP1
APPBP2
LYPD5
PMS2CL
FAM14B
LOC649987
MMP28
GGT3P
CD99
NUDT19
HAUS4
GARNL4
FAM13B
TRMT2B
LOC651410
SNHG1
FBLN5
IQGAP1
GDF1
MTHFR
SCD
LOC649107
SYCP2
APOB48R
KLF9
BPIL1
RIOK1
HAND2
TSC22D3
GAS1
ZNF700
GRTP1
FAM75A1
PVRL4
GBAS
SLC2A14
ABCC11
LOC730668
C21orf88
C17orf44
GADD45G
C5AR1
BRWD1
C9orf36
SCAND1
FAM46A
LOC650463
LMNB1
LOC100008588
CCDC4
C7orf65
EDN2
ZNF140
ZC3H5
SIK1
B4GALNT3
CEBPD
LOC729387
TAC3
LOC284422
SNORA16A
LCT
LOC137107
MGC10701
CRTAC1
PCMTD1
LOC648117
KLRC3
FBXO8
LOC647008
GINS4
TRIM4
ODZ1
TRPA1
ALG5
ELK4
CLYBL
LOC387723
DHX58
CRAT
TLR3
HIST3H2A
LOC441326
LOC643203
EPC1
LOC646456
PIH1D2
FBXO7
C1orf198
APH1A
LOC644644
MAGED2
LOC729479
TAOK2
PRCD
LOC641744
EFNA1
ACP2
HMG20B
LOC730274
LOC732206
GSTT1
ATP6V0B
MIIP
FAM149B1
PRR20D
LOC100132139
MIR648
LOC100132635
PTCD2
ERCC-00076
LOC653110
LOC401399
NIPAL2
UTS2D
LOC389517
WBP1
VAMP1
CCL28
LOC653609
TBX3
LOC646897
SUGT1P
PATL1
JMJD1A
MIR376C
TMED10P
SPATA21
IL17RB
LOC642933
LOC643350
DDAH2
LOC100130825
ARID5A
LOC339766
XRCC1
FLJ41856
PLEKHG6
LOC100131205
RIMS4
DPP7
MFSD3
USF1
CPS1
IFI6
VPS13D
ZDHHC1
LOC100128943
LOC100134266
LOC440297
MURC
FRAT2
EML2
TDRD7
WHSC1L1
ACBD4
SUCLG2
GJA1
CCBL2
SFMBT2
SGCB
MSRB3
LOC645391
MSX1
LOC100133408
DAB2
RRAGC
TM9SF1
CCT6B
SFT2D3
ARHGEF3
PTPRA
LOC100128063
LOC728689
[truncated: 345 more rows]
