# Supplementary material for: Association of SNPs in the PAI1 Gene with Disease Recurrence and Clinical Outcome in Bladder Cancer
Source: Int J Mol Sci. 2023 Mar 3;24(5):4943. doi: 10.3390/ijms24054943 (PMC10003630; doi:10.3390/ijms24054943)
Supplement: Supplementary file 1 [file ijms-24-04943-s001.zip › Supplemental Table 5.xlsx]

## Sheet: 5637
Supplemental Table 5: The list of DGEs between WT and rs7242.
LOC148430
ATP1B3
IFI27
DSTN
LOC729964
LOC645387
OAS2
IBTK
IFI44L
MYCBP2
USP18
PKIA
PTMA
ING4
NARS2
RPL23A
LOC100134393
PABPC1
RPL23
CHORDC1
RNF19A
TLN2
LOC100129028
PARP10
HNRNPA2B1
SETD2
LOC643949
UBE4B
LOC100132240
SLBP
SBF1
IFITM1
LOC729009
DLC1
RPS23
SRPX2
PANK1
LOC642975
OAS3
COL6A1
CYP26B1
TCP1
VPS37A
TGDS
DCBLD1
LOC644162
LOC728661
SULF2
ANTXR1
PIGU
LOC440595
LOC220433
TDG
MTP18
LOC400446
CCDC91
MLKL
MTMR6
LDHB
LOC100131139
NR2F2
LMO4
CLK1
C6ORF173
LOC647000
TSC1
ZFP36L1
BOAT
EEF1AL7
IFI16
LOC440731
HS.213541
MFSD1
LOC729200
LOC100128274
AGL
TPST2
HERC6
GJA1
UBAP2L
EXO1
MX2
RGS17
DNER
TCF7L2
CXCL6
MST4
GLA
FAM120A
MAP2K2
MIR425
INTS10
APTX
LOC641844
CXXC5
CORO1C
SNORD31
SUCLG2
LOC729816
RCL1
CDC7
AIF1
LOC728031
TMEM4
FAR1
PTP4A2
TM2D1
SFRS1
CCT7
ID3
BCAS2
RBM12
C13ORF27
PIGV
LOC100130511
SLC16A12
LOC644131
CRY1
MYBL1
SLC25A44
MRPL52
ZFP36
UBQLN2
EEF1A1
FLNC
ALG6
LOC645979
LOC402251
FLJ22795
TWIST1
2017-09-03
LOC100131196
FAM133B
TMEM101
BUB1
LOC134997
CDCA3
IFI6
DNAJC10
B4GALT5
SLC35A5
LARP4
PPIL1
ZNF22
SDHC
HS.388997
RPS27A
BIVM
MAPKAPK5
VHL
GDF15
RPL13
LRRC45
DMAP1
LOC390354
MRPL52
LOC652783
C3ORF21
PERP
SHISA5
2017-09-15
ULK2
FAM102A
PEMT
VPS13A
SFXN5
C14ORF102
MND1
ACN9
TRIM25
LOC643873
PSMD11
KIAA1267
CRABP2
LOC347376
ANXA2P1
DCBLD2
RPPH1
CSAG3
DBT
GPR1
LOC643387
LOC649821
USP33
LOC148413
TMEM203
LOC728139
ACTR6
COMMD3
KIF21A
FTSJD2
HCFC1R1
DLX5
LOC100134530
LOC730255
TFAP2C
MARCKSL1
ABCB7
FLRT3
CAPN1
EIF2AK2
LOC100132291
TMEM200A
CCDC88C
CDH2
OXR1
SLC35A1
KIF11
SLC29A2
IRF7
LOC100130886
SLC4A5
LOC645452
TUBB2B
ALG13
IFNAR1
SAR1A
FAM111A
NLGN4X
HIGD1A
AP1S2
IGSF9
KLF3
NCOA6IP
TMEM44
FKBP3
RALBP1
STIM1
PGRMC2
STAMBPL1
C10ORF137
MTX2
CAPRIN2
INTS3
LOC100131261
HSPA6
TUBA4A
RPS6KA4
LOC441073
SF3B14
TMEM177
MLEC
FUS
LOC730740
SOX4
2017-09-05
USP48
LOC100129095
RBM23
LOC730060
POPDC3
OAS1
TAF1D
RPS6KB2
URB2
UAP1
MGC18216
BARD1
CNPY2
KIAA0363
LOC729926
FAM156B
ORC6L
PHF11
FAM72D
CXORF26
NCKIPSD
CNOT8
LOC644039
MGEA5
IFI44
COL4A5
C5ORF35
LOC144817
ANKRD9
HMMR
GPS1
RPUSD2
AMD1
ZNF275
XRCC6
CDC26
SPRR2E
ACADVL
SNORA25
COG5
C14ORF169
MLEC
TACC3
LOC399988
SUMO2
MRPL18
FAM104A
CEPT1
PRKX
PTPRE
NECAP1
OAS1
RNASEN
LOC100130633
LOC440927
C20ORF11
USP21
HMGN1
TPP2
AIF1L
LOC642513
LOC441294
UGCGL1
CTPS2
CCDC109B
PLEKHA1
AKR7A2
COCH
LOC728428
NIF3L1
LOC100128731
NAPRT1
RAB34
ARL16
COX7B
CP110
EXT2
ANXA2P1
LOC341315
RBM9
EEF1E1
MT1F
GCDH
RBCK1
PES1
RDH14
RAI1
IP6K3
GDI2
LOC100131787
ASB7
RPS26L
LOC729301
CNNM3
LARP7
SIAH1
BST2
TUBB
BTAF1
NAGK
CDC45L
C7ORF36
ALG3
EDARADD
DUXAP3
LOC647081
LYAR
HN1
CDC16
ZMYM4
LOC440063
SNTB2
RPAP1
UNC5A
CALR
IRF7
COL4A6
UCRC
PSMB8
LOC399959
LOC644745
HIBCH
LOC728126
FAM122B
SMARCA5
SAP30
CDC2
KAT2A
THAP10
PABPC1L
LOC729086
COPS8
RAB7A
B3GALT6
VPS25
CNOT7
B3GNT1
LRRC58
CNTNAP2
TTF2
RAD54L
ZBTB4
SKP2
PDZK1
PHF11
IL10
ANTXR2
OAS1
TSR1
DEDD2
GTPBP8
ZNF232
NT5DC1
KLRAQ1
KIAA0194
GLRX
DCAF7
FANCG
TUBA1A
HS.137971
LIMCH1
LOC642934
C18ORF10
LOC653820
BRD7
HMGB1L1
MAT2B
SIPA1
BEXL1
UGDH
LOC100129657
C15ORF52
MOBKL2B
LMAN1L
RANBP10
LOC392285
RHOU
PLAU
LLGL1
LOC642031
CMPK1
LBH
LOC100131609
RAB11FIP3
LPAR3
AHSA1
SPRR2F
BAG5
FTHL8
BRD9
PCNA
SMARCC2
RAB2B
BRPF3
LOC401019
CCNB1
ZNF227
ST3GAL2
LOC100129742
AVEN
C5ORF39
GUSBL1
USP14
TTC31
PLK2
COPE
KPNA2
RBM6
PGBD5
GIN1
MPRIP
MRPL50
BBX
SRA1
RFWD2
SERPINB2
ZNF148
SPRY2
REXO4
POLR2L
LOC727761
TMED10P
PPP1R14C
CSRP2
F3
FOXQ1
IFIT1
MAP3K1
SPCS3
CRELD1
C9ORF140
DNAJA3
ZBTB22
LOC730107
LAMP3
TRAF5
TMEM199
PKIA
SYPL1
LOC255167
RNF130
GNG11
QRICH1
SIVA
LOC100132528
ABCF1
RPS3A
MAPK9
ATF4
DDX52
LOC439953
CCDC77
MYO19
CTHRC1
WDR77
LOC643287
LOC731640
PTPLA
IFIH1
CDK5RAP3
LOC100133163
XPO4
DOCK9
GGCX
SEC23B
SNX16
UBE2N
MLLT6
LOC645691
HHAT
C9ORF23
ACTR5
MAP3K6
ARL5A
TNFRSF1A
FRAT2
CYP4V2
PGAM4
C15ORF39
MAPK1
POLR1E
FVT1
MRPL36
C19ORF42
CPD
STAT2
HS.547587
RPL7
LOC728484
LOC100133598
LOC654174
SLC44A4
PTGS2
PSCD1
LOC143543
LOC389816
MED14
UBE3B
NFKBIE
NDUFA8
RNASE7
HS.570107
LOC650832
INVS
COL4A5
PIGH
CHCHD4
WSB1
CRISPLD2
FBXO11
PARP9
LOC644799
ACSL5
MYO10
STAMBP
CENPF
C11ORF84
MITD1
LOC650029
PHB
COQ10B
TAF6L
TIMM8A
CELSR3
ROD1
DIAPH1
LHFP
LYSMD2
NIPBL
LOC646786
SNORA61
PHF19
C6ORF160
DAAM1
TBC1D2B
OSBPL3
STX4
FLJ20254
EIF1B
LUZP1
SRC
RAD21
AURKB
HS.485155
HYOU1
FAM100B
EFHA1
ADD3
C11ORF75
INTS8
2017-09-11
PPM1B
FAM43A
FOXA2
ASNS
LOC642956
PRMT6
NUDT22
LOC728820
PBK
OGT
CHD9
FYTTD1
C14ORF100
FAM111A
LOC646993
APH1A
KIAA0020
LOC653610
TGIF2
HARS2
MYO1B
DEXI
MANBA
FOXM1
ZSWIM6
GPT2
FAM89A
LOC100134159
NUP62
CYB561D1
MTHFD2
ZBTB33
C2ORF42
ECGF1
GPR81
GAR1
RPL34
THAP11
HLA-H
CBX2
DUSP10
FDFT1
MOXD1
VPS36
PSMA6
HMGB2
GJB2
LOC648103
TGFBR2
KCNS3
SERPINB2
WWC3
ZNHIT2
BRI3P1
MTMR11
DYRK3
SFPQ
SLC38A2
CEP70
PRKAA1
2017-09-06
STAP2
NP
2017-09-03
DCUN1D5
ORC2L
LOC647436
RPS6P1
LOC729768
RAB4A
MYO19
DUSP6
DCUN1D4
DCTN1
GLIPR2
FTHL2
TRIB1
N4BP2L2
STAP2
TCEB2
INTS1
PPP2R3C
LOC440991
FLJ20628
TMEM156
SDF2L1
ZDHHC16
YWHAG
HNRPA1L-2
KIAA1310
LOC441377
LOC389322
MKNK2
CTSD
FLJ22662
OIP5
LOC653778
C19ORF28
ZNF529
MRPS17
TSEN34
TMEM39B
LOC728128
FLJ43681
SPC25
SFRS10
GHITM
RPN2
PRDM1
SLC35A4
HADH
THUMPD3
CD99
LYPD6
SLC11A2
FOXO3
LOC732360
TRAPPC5
C2ORF64
LPXN
LOC439949
RAXL1
HS.575583
PROM2
ITPRIP
EFNA4
PLEKHA2
CUL4A
RIC8B
LPL
PLCG1
HNRNPA2B1
AKR7A3
STRN4
RPS6KA2
KIAA0194
DLX1
HS.370359
IMP3
LOC440487
ADAR
FOXM1
LOC728823
GLIPR1
TMEM218
SNCA
MAN2A1
FANCI
LOC653658
LOC283412
MECP2
LOC653344
C8ORF41
CMBL
TFAP4
LEPROTL1
MYST3
MAN2B2
DOCK10
RAD51L3
HS.123119
NOX4
ZFAND2B
SNRNP40
IFI30
EPHA1
PMEPA1
TNS3
ATXN3
LOC100130905
SRPX
PLAUR
ZNF323
PDE4C
NARS
FBXL15
LOC644237
DLAT
ZNF609
CD44
GPATCH4
RPS21
PPP4C
MGC16169
OSBPL5
METTL13
BCL2L11
LAMA1
KTELC1
LIPG
LOC645452
P4HA1
LSS
APEH
ULK1
RCN1
PAIP2
PLD3
BLZF1
NCAPG
LOC645058
NAB1
VPS13C
CYB5R3
RBCK1
WDR51A
MARS2
SP100
TAP1
PNKD
HS.148844
LOC729859
RNGTT
TRIM21
SRM
DARS2
IMMT
PPA2
ARL6IP5
SERPINB6
PPARBP
CEP78
SLC30A5
UBE3C
LOC100133273
THNSL2
NHP2
ACADM
LOC387867
HS.568964
CMTM3
MFSD3
RNMTL1
HSZFP36
TMEM16A
LOC645914
ERAL1
CYYR1
IRX3
RANBP3
ZNF706
ZNF259
LIG3
HNRPUL1
OGG1
LOC392437
NR2C2AP
IFT52
GPC6
STAT1
RRS1
ATP6V0E2
RBM33
CBX5
FEN1
POMGNT1
LOC100130734
ABHD3
SMAD5
HS.559654
H3F3A
KCNK1
UBE2L3
NIPA1
C7ORF27
SUB1
RABL4
LOC100128505
LYRM7
ZBTB46
RCOR2
LOC654103
MYCL1
UBR5
DYNC1H1
TNC
C3ORF64
CDC42EP2
BRP44L
TEX264
PRKCZ
FAM113B
HBXIP
C6ORF108
RPL9
TMX3
LOC388076
SLC29A1
ZRANB2
LPGAT1
ZFYVE27
IL24
CD99L2
PPARG
PINK1
RAP2A
LOC651951
MORN4
AMY1A
N4BP1
STIL
LOC440585
TUT1
UPF2
KTN1
FOXD2
RUNDC2C
PARP4
TBC1D14
TP53I3
URM1
ST6GAL1
PAPSS1
IFITM3
TTYH3
FAM105B
RNASEH2C
NOL12
IFI35
LOC390705
ABCC4
DHCR24
DFFB
TACSTD2
GNAI2
ASTE1
ST13
PPTC7
IRF6
NUP62CL
HSD17B7
CEP78
LOC200030
RBM4B
BRE
TMED1
CDC16
LOC644101
LOC284167
MYO9B
ADAR
HS.317248
SNRPN
C20ORF94
LOC645233
UBE2C
ALKBH8
SNRPF
C14ORF104
ZNF331
CEBPG
CLK2
IER5
M6PR
USP13
ERP29
CD47
IQGAP1
SERP1
C12ORF47
PDCD1LG2
ECHDC1
2017-03-04
HES6
DUX4
HS.519225
GATA3
KLHL12
HS.98458
TMEM138
LOC650465
PRELID1
SBK1
RUSC1
B9D2
PKN1
MAGMAS
MKL1
RPL14L
CDK4
LOC100133233
CRELD2
ASXL1
PDLIM4
ZDHHC5
PBX3
NDUFAB1
AP1S2
SBDS
PRRC1
LOC646214
DYNLRB1
OSTC
STX2
FLOT2
EARS2
AKR1C3
LOC100132742
TMEM189
LOC100133823
PMAIP1
NDUFA10
ZNF362
PARP14
PPA2
AKAP11
LOC731985
SGK3
RGS12
PFAS
SPINT1
NAT12
C6ORF153
CALD1
PHF19
SLC29A4
PPIC
CCDC101
ABCE1
MFAP2
SPRR2D
CSE1L
ABLIM3
IL10RB
FAM89B
FIZ1
TBCE
XBP1
LOX
SERPINH1
C12ORF66
ICAM2
CBL
CDC42EP4
RNH1
KIAA1797
CAPN2
MRPL49
KIAA1737
HLA-A29.1
TRABD
LOC728014
PPP1R10
UBE3A
RNF216L
HMGB1L1
TMEM216
GRINA
PNPLA6
RUFY1
PRUNE
EPN3
GCET2
C14ORF145
PFN2
LOC389787
SMAD6
ZNF828
C5ORF13
ZCCHC11
PLOD3
ARL4C
TMEM147
HOXA5
UBE2Z
NCOR2
SLC16A4
TMEM62
PANK2
SDF2
RPUSD4
DGCR8
LOC100131205
SHISA2
LOC653421
ELOVL6
LOC402694
PARP9
FAT1
EIF2B3
NUP93
NUMA1
EDEM2
CYCSL1
LOC643384
LOC643702
TMEM41B
ZC3H11B
PTPN4
TBRG4
HS.120208
SCARNA9
ATF4
LRDD
METTL1
CRTAP
ARPC5
ELMO2
ASAP1
LOC441154
SAP30L
GLCE
C16ORF42
LOC645138
HINFP
CDK5RAP3
GBA2
BCL7A
HLA-B
AMMECR1
DUSP23
OGDH
HERC5
TTC17
LOC646688
HS.582526
ETS1
KIAA1211
C20ORF55
RUNX1
C16ORF53
INTS6
PILRB
CASP3
C14ORF135
LOC649143
FKBP4
UBE2L6
PPIL3
GART
FLJ35390
KIAA1429
SNORD104
ARMET
HSPA8
COL16A1
ATP11C
MTMR10
SNORA57
IGF2R
SCD5
DNAJB2
LOC644250
NONO
RPRD1B
RPL37A
SHQ1
RERE
MUM1
IRS1
GABARAP
ATP2A2
TRIB2
LOC442582
TACSTD1
TGFA
SEPW1
ATP5I
C10ORF35
HMGA1
KIAA1267
MED16
MMS19L
GDI1
NFX1
PTPRA
NTAN1
CDK2AP2
SNORA18
ZCCHC14
DGKD
ADRBK1
MIR1978
SOX7
LOC643284
DPM1
RPL14
KIAA1279
HS.562647
TNPO2
TNFRSF19
NCK2
MRPL48
HIST2H2AA3
FIBP
STS-1
APLP2
UBE2Q1
FSD1
LOC100129222
NHP2
KLHDC3
HS.572642
ABHD2
RABGGTB
TCF3
SH3KBP1
PLSCR1
CTNS
ATP2C1
TBP
SLTM
ENC1
PPARD
GNG5
ZNF444
C2ORF47
RIBC1
INTS5
FTHL11
PSME3
ID2
ACAD9
USP48
PTGFRN
PSMA3
MBNL2
ZIC2
WWP1
TBPL1
FZD4
ARMC10
SMPDL3B
TMEM165
PDCD10
SH3BGRL2
LDLR
LFNG
LOC646785
BCL3
ADH5
FBXL6
C11ORF54
RILPL1
TBX3
POP5
C10ORF6
DEGS1
CXCL6
PAK1
LOC389816
SPIN4
LOC113386
LOC644330
LOC644642
C22ORF29
RECQL4
MAN1A2
FBXL18
LOC731878
GMNN
ZNF621
MATR3
TTLL5
TSPAN3
LOC132241
FLRT2
AGA
NOL8
C21ORF63
FNDC3A
WAS
SFRS18
TAOK1
KIAA0586
C11ORF34
C1ORF106
SS18
EIF4A1
MAGEA6
NUP210
RBL2
SLC23A2
KIAA1967
SULF2
FOSL1
S100A3
LOC644684
MAP4K4
PLA2G16
SEH1L
FKBP14
SCN5A
ODZ3
FAM35A
LOC652850
ATP11C
LOC652101
BDH1
IKBKG
TCEAL8
ONECUT2
NDUFC1
DUSP3
DDRGK1
STC1
LOC100132795
LOC642645
CBL
C7ORF55
KIAA0528
MGC3196
SMNDC1
CAPRIN2
HIF1AN
WDR4
MTA1
LOC728590
RIPK5
SCOC
COL7A1
MGC71993
NOMO2
C8ORF37
IPO11
SHFM1
MET
EXOSC8
LOC100129828
PECI
FLJ39827
SNX3
SLC44A2
CCL13
TMEM150A
LOC493869
RAB11FIP1
ZNF598
MRPL47
LOC644936
HS.125087
RLN2
LRP3
C17ORF96
TBC1D9B
C20ORF3
MBP
SPTBN2
TRIM47
APPBP2
FAHD1
NUP188
SDHALP1
SLC20A1
SPCS3
FAM164A
TOP2A
ZNF594
TAGLN3
MX1
ADCY1
DYNLT1
LOC648980
PAQR3
OCIAD1
DBNDD1
MBTPS1
RAI1
YIPF1
SNRNP27
FBXO46
TIMM17B
DPH2
LOC100128353
STIP1
SECISBP2
LOC644604
LPIN1
UBP1
NPC1
ZNF788
EFEMP1
KIAA1731
LOC389137
LOC644033
C18ORF10
ECD
C14ORF4
THY1
WDFY1
ISOC1
MFI2
CDKN1A
NDUFAF3
MLLT11
C19ORF43
MSL3L1
KDELR3
C8ORF16
SNRNP27
CLIC1
SLC25A14
HS.440548
CCT7
SFT2D2
LYPLA2
BIVM
PCTK3
UNC45A
NCBP1
DLGAP4
MFGE8
PPAPDC1B
OCIAD2
UBA7
ACVR1
ZBTB34
PSMG4
KIAA1949
LOC645644
TOPBP1
CNDP2
LRRC41
LOC729242
MTAP
CDKL3
YWHAB
NDRG2
DBI
ZNF580
PDE7A
SP110
LOC100132863
ALOX5AP
LOC729680
MRPS33
C9ORF80
CREG1
CSNK1E
DIS3L
RHBDF2
MUC16
MGC3032
SP100
NUDT21
KCNK1
RASSF3
VHL
ERI3
C1ORF115
MNS1
EIF5B
MCM3
ANKRD33
ZDHHC16
CEPT1
TATDN2
C8ORF55
HSPA5
GJC1
PNN
PDZK1P1
LOC100129933
JMJD8
ONECUT2
LOC648771
CISD1
LOC648210
IGF2BP3
CRIPT
KIAA1545
SSBP1
LOC646819
UTP14A
FOXA1
MIF
LCLAT1
RASA1
GIT1
LEMD2
CIAO1
ZFP64
PITPNC1
CHMP5
LOC647673
ZNF266
AQP11
TMEM158
CNKSR3
PTDSS2
IGFBP2
HERC2
UBQLN4
RYK
HS.550310
CENPE
SLC10A3
HKDC1
RBMX2
DLD
HS.336511
COG6
CKAP2
CLCN7
ZCCHC7
TMEM219
CRIP1
SYTL4
LMBR1
SLC35E1
RPL39
CADM4
UBE2D2
TUBA3D
UBE2F
TSPAN14
SLCO3A1
PLCL2
HSPD1
STC2
GLG1
TERF2IP
SLC25A38
LOC648742
PLAT
C17ORF58
TXNDC17
RPS28
MCL1
ACACA
RAD23A
FLJ22184
LOC100131850
UQCC
GCN1L1
BCL7C
BAT3
PSIP1
EMG1
LOC389599
AAMP
SS18L1
PDLIM7
MRPS2
RPTN
DYNC1LI2
MOBKL1B
ZBTB24
SNX7
YWHAG
GPATCH3
IFITM2
SUCLA2
RPS26P11
GRAMD4
C14ORF135
SMG7
ABCB9
HS.4988
POLR1C
POLA1
HS.563969
EIF4EBP2
C7ORF26
PLXNA4
LOC728661
CYP20A1
EPSTI1
TRPV1
RAP2C
HMGB3
ISCA1L
KLK6
PRDX5
LOC100130818
DBNDD2
MRPL19
SLC25A28
DEPDC1B
KLC1
NCOA3
CCND3
MYPOP
HNRPUL2
C2CD2
DHRS1
NEDD9
LGALS8
USPL1
HS.296031
RTTN
NT5C3L
COPS6
RAB10
HMGCR
FAM156A
ABLIM1
PRKAR1A
LOC645173
NSUN5
LOC389404
FAIM
OGFR
ZNF434
TMEM203
LARS2
CBX6
C6ORF106
NCOR2
TPI1
TRAP1
PTPMT1
CDC25B
C9ORF86
ZFR
PDDC1
NBPF14
PAQR5
EIF1AX
DFNA5
LOC729340
NDUFB10
LOC100128547
SLC39A8
ISG15
HMBS
CUTA
HLA-F
YEATS2
ACOT4
MMGT1
OAF
TRIM6
EXOSC3
KIF22
UACA
LOC647030
SMYD2
LYPD1
AIRE
CHST12
LOC646688
OGFOD1
IL17RD
DUSP22
HOXB5
LOC284232
CENPE
PROCR
RNF34
INO80B
NBEAL2
MESP1
DPAGT1
HYOU1
UBE2D4
HS.333185
LOC728244
PLEKHA9
DDA1
TM9SF1
LOC647786
LOC652489
UFC1
BRWD3
LOC644907
C8ORF76
LOC727820
ZDHHC9
NCSTN
GTF2A2
CISD1
OSTF1
LOC100132992
CD276
NBPF3
MCCC1
ALG8
DONSON
FERMT1
UBN1
RAD51L1
CTBP1
UBXN10
MGC39900
PLEKHM1
PHF12
ARMC1
CROP
CPXM1
KCNMB3
CYTSA
LOC391142
TSEN2
TMEM194A
ERAP2
LZIC
CTSH
HS.551755
LOC100129522
ZNF311
FLJ41941
NAMPT
CDK5RAP1
PTPN6
NFX1
SHMT2
PCTP
DHPS
ARAP3
LOC729495
NICN1
HS.213061
PPPDE1
C12ORF62
UTP6
ATPBD1B
KLHDC5
KRIT1
ZBED1
MRPL34
C22ORF13
LINS1
SFTPA1
ZDHHC14
C20ORF117
MMS19
HLA-A
HS.283402
DLK2
HS.555208
TNFRSF8
GPR110
DONSON
ARSD
INF2
SS18L2
HBP1
UNC119B
NES
LOC391370
ZNF486
ITPRIP
ZNF644
ZFYVE20
CAPN5
TSPAN17
SNUPN
ENY2
ARHGEF10
ZSCAN16
MST4
LOC644311
CLTC
ZNF787
APITD1
HS.365163
ING1
NHP2
XPO5
RRAS2
LYN
SLC45A3
LONP2
IP6K1
ATP6V1G1
LOC100133991
RBBP7
RAET1G
C22ORF30
FABP5L2
BRD1
LOC440055
SFRS7
C14ORF102
FABP5
SYVN1
PREPL
RAD51C
MKI67IP
SCRIB
RBM14
BRD2
LUC7L
SRP72
CASP10
NDUFB9
SLCO4A1
NMD3
SYNJ2BP
RGS12
PREPL
C12ORF43
NT5C2
C14ORF166
ARFGAP3
CTDSP2
LOC145853
BAT2
LSM2
CCDC109A
NFIL3
EXOSC9
C22ORF39
ZMYM3
NSL1
CLN6
NDRG3
ZNF200
FAM20C
PGCP
DHRS2
RPS18
PTRH2
LOC100128060
PTPN3
UBAC1
PTP4A3
HS.527954
MCM10
LOC441642
TSR2
HS.552957
CLDN9
AIF1L
FBN2
H1F0
UNC13D
MGC61598
ZDHHC3
ITGB5
RPE
C12ORF30
SCAMP3
TM7SF2
UQCRH
THADA
SNRPF
AP3S1
CHRNB3
KCNJ15
PPT1
PRIC285
C16ORF59
NHP2L1
LOC732007
LOC645715
HS.412918
RFESD
POLR2H
C3ORF75
HS.513971
C20ORF72
CSF2RA
LOC642828
DNM1L
UBTD2
FBXW7
LOC391126
PHF23
DNAJA1
MAP2K4
PAIP1
LOC391075
PODXL
LYSMD4
ANAPC13
MRFAP1L1
ZNF830
CDC2L5
PSMA4
RDX
C14ORF106
CYTH1
BOLA2
PEBP1
NUPL2
HS.60257
NOC3L
MSI2
KIAA1522
B3GNT6
SLC38A10
MRPS11
AGPAT3
FAM69A
XRCC5
KIF20B
MRPS6
HS.582988
PLK1
GNPAT
ERP29
NUP35
YES1
NIN
KIAA0494
AUP1
NME3
NAP1L1
RRP8
GTPBP6
ZNF136
TMEM194A
WRNIP1
DEFB125
MGC10997
ZNF341
THOC2
PRDX1
PTPRG
LOC100132658
ARID1A
H2AFX
MRPL1
PARP1
PCNXL2
SEC61A1
TMEM50B
SNX3
WDR70
SMARCC1
NFXL1
LOC100132585
MAP4K5
NFYA
DNAJB14
UGP2
LOC441453
LOC100133277
PRCP
COLEC12
TBX10
CCDC14
PSD4
LONRF3
IFI6
AKR1A1
HS.355933
LOC100129502
VASN
DDX20
LOC728844
TRRAP
LOC643300
NUCB2
ACACB
KYNU
DDX60L
RHOT2
ETV4
EIF2C2
WDR54
LSM1
SLTM
PRPSAP1
GCA
C1ORF86
HISPPD2A
ARAP3
CSRP1
AKAP12
YARS2
PPP6C
UBXN4
ASAP1
VAMP8
LOC100133812
ANKRD13C
C19ORF24
FNBP4
NFATC3
ZMYND19
GPKOW
PEX6
PHIP
LNX2
CPA4
C1ORF71
CCDC16
FLJ23584
ABHD8
FARP1
RPS27L
RFWD2
HNRNPA0
GINS3
PIGP
TIPRL
FAM116A
LOC100132240
EXOC7
SLC35C1
DUS1L
RPF1
DHX16
FLJ46309
HSDL2
TPST2
WDR6
LOC339970
DTD1
LOC645293
FAM195B
KLF4
C2ORF28
FAM178A
ST14
PRCP
TAF1A
MNT
C17ORF61
[truncated: 5,471 more rows]

## Sheet: UROtsa
Table S5.The list of DGEs between WT and rs7242.
LOC100128573
LOC642558
DOK1
LOC653489
LOC653118
HS.563667
LOC100131431
SDR9C7
MIRLET7A1
TMPRSS7
BVES
GPR109B
MIRLET7C
CDC2L1
LOC338579
TRPM1
LOC729616
LOC283584
ZNF440
HS.568326
POTEH
FTHL17
FAM90A10
HS.485841
HS.545507
LOC440407
LOC100131257
LOC649340
LOC728463
CSRNP3
LOC401589
HS.538746
HS.498025
HS.537363
C1ORF201
GABRQ
LOC652880
HS.582070
SIRPB1
ADAMTS2
LOC253724
LOC643330
DPP6
KIAA1843
MIR639
C1ORF27
HS.504036
HMHB1
LOC653468
HIST1H2AK
NMNAT2
LOC644732
LOC653867
SPIB
HS.459104
DEFB114
TMF1
C11ORF36
LOC441261
FAM19A4
PAX8
LOC652217
MICAL2
HS.137206
KCNJ6
LOC145820
LOC100131836
ARL13A
LOC645000
ITGB5
LOC730401
COMMD5
LOC389102
CHRFAM7A
HS.584357
FSCB
LOC646629
LOC100130536
MIR217
LOC643149
LOC388259
LOC100130187
ASPA
CD164L2
LOC100132386
LOC100132791
LOC390251
HS.519298
HS.144884
FLJ40672
KIF5A
RTN3
MS4A6A
OR4F6
LOC100133130
LOC653254
LOC441957
LOC653203
LOC648169
SLC6A15
SCARF1
MIR496
TRO
RSPH9
EGLN3
VIP
PRINS
STARD13
LOC642956
ZNF705A
MX2
SCGB1D2
LOC100129269
C1ORF87
LOC100134022
ZNF286C
LOC651728
LOC729907
LRRC36
CHRFAM7A
ZNF474
CUZD1
GRTP1
ARHGAP8
LOC653983
FAM78B
LOC653673
CAPN11
HS.560046
SYNM
UBE2J2
LOC644251
FLJ39739
LOC650253
LOC642398
APOC4
LOC643012
PI15
KCNK10
MAML1
LOC100129443
CCDC54
LOC650755
LOC642426
AADACL2
HS.541130
TMCC1
FAM108B1
WDFY4
LOC100128942
TRIM71
RGR
SMCR7
HS.573320
C9ORF41
LOC643700
HS.571502
INMT
C20ORF118
FOXR1
LOC100130341
RAD54B
ZNF681
TMEM17
OR5M3
C4ORF16
CCDC116
LOC100131704
SH3TC2
TM6SF2
LOC440905
LOC729408
LOC643231
LOC652610
LOC440795
LOC651808
FOXG1
C19ORF64
SIGLEC16
LOC650074
CLPS
LOC286135
LOC653683
GOLGA7B
LOC158730
PHF20L1
LOC649466
LOC100129531
RCP9
LOC641994
LOC100127910
TEX101
LOC653073
C5ORF62
LOC643910
LOC390332
LOC100131820
MIR300
HS.543092
HS.86941
ZNF354B
BZW1
LOC645527
CHRM1
HS.561929
SNORD1A
LOC645363
PCDHA9
LOC651694
FLJ44635
LOC731823
LOC646626
LOC649745
LOC100130616
PSMD12
MIR1293
LOC649546
LOC401778
LOC648585
FLJ90650
C1ORF116
SNORD116-29
HS.582886
LOC126767
GRIP2
PIK3R1
LOC646471
HS.554203
FCRL6
LOC732424
SLC7A2
LOC652808
HS.538103
AOC2
KSR2
HS.144030
IL33
ADORA1
HHIPL1
HS.201719
LOC390372
KRTAP2-1
SHANK2
CAMK1D
LOC647008
DND1
LOC150786
HS.544140
LOC645958
LOC651309
LOC645040
IL13RA2
MARK4
FNDC3A
RAD18
CAST
LOC100128997
HS.445414
LOC440456
LBH
HS.562488
LOC729261
POTE2
PCDHB7
LHX8
WFDC12
HS.43938
C17ORF41
SCGB2A2
LOC643102
ERCC-00117
ADH1C
SNORA74A
EOMES
APOBEC3G
SPAG11B
LOC100127961
PCDHGB8P
LOC654114
HS.390856
CACNA1A
ZNF658B
LOC643717
CNBD1
NSBP1
LOC649848
C8ORFK32
MASP1
HS.538495
LOC653081
LOC646664
SAMD13
LOC643491
C17ORF89
HS.545587
C6ORF25
LOC652522
LOC340900
LOC642859
HS.122007
HS.562219
LOC441136
LOC145845
CADPS
LOC644634
OR2T35
HS.143732
LOC642733
CYP2D7P1
HS.224678
DNAJB14
LOC649406
LOC654350
LOC642879
SMA5
LOC100128783
LOC647254
LOC349114
LARGE
LOC653324
LOC90925
LOC650599
AMAC1L1
LOC646269
MAGEC3
ASB17
ACTR3B
CA9
C8ORFK36
CARD11
SNORA26
HS.570966
HS.566881
PRAME
LOC653852
LOC644548
LOC729444
FEZ1
LOC652553
LOC647246
LOC650713
SLC16A4
LOC648541
OR5D16
FLJ44006
NXF4
ZNF404
IPW
SYNE2
HS.336593
HS.583123
CDH9
RYR3
LOC641983
AK5
C1ORF220
RRAD
LOC643449
MSR1
MIR588
ARMC9
HS.562281
FLJ43950
ANK2
LOC648851
MMP17
LOC389174
HS.300262
LOC652840
LOC645690
C6ORF103
SCMH1
LOC100131895
LOC439949
LOC643533
ILDR1
LOC642458
MGC21881
LOC100130846
CD4
HS.370423
LOC647713
LOC653362
LOC729003
LOC100134812
LOC727938
C8A
MIR155HG
NEBL
LOC642166
DMPK
LOC647854
KRTAP9-8
CLEC2L
LOC100134217
ZMYM3
HS.148448
HS.553070
LOC390213
PTPN2
BTBD3
LOC652344
MIR1237
TRPM8
CORIN
LOC100129162
PSAPL1
MIR1266
NDUFA4L2
LOC100133639
RRH
FLJ20444
HIGD1B
LOC648405
ALOX15
ERCC-00095
LOC644278
LEPREL2
HS.572889
MYCL1
LOC647336
LOC643441
LOC100130015
MIR612
COMMD4
LOC644122
LOC644026
LOC645279
CYP2C18
HS.134634
LOC732393
LOC648609
LOC647343
PRDM16
LOC728170
LOC642821
PLEC1
LOC643496
CBFA2T3
FCHSD1
HS.552183
DGKI
CT47A1
CACNA1E
LOC645983
TNFRSF19
LOC652396
ACRC
SERPINA1
SLC12A6
MGC27121
HS.136788
LOC401648
LOC387761
BTF3L1
L3MBTL3
C10ORF11
EIF4G1
MAGEA5
C2ORF80
LOC645723
LOC100131760
LOC643222
LOC100131675
TEDDM1
LIPC
COL5A3
LOC652438
C15ORF5
LOC653185
MIR31
LOC651513
LOC643037
NCK2
RNASE9
TAKR
NR1I2
LOC100129720
C1QTNF9B
LOC650296
WDR89
LOC127099
USHBP1
KRTAP15-1
HOXA2
C1ORF94
LOC731511
LOC646561
LOC100131323
TLL2
PNMA6B
KHDRBS3
LOC727969
CASC2
FXYD2
HS.519750
C15ORF34
HS.566933
SEPT1
GRK4
LOC642995
LOC641823
LOC732275
ALG13
TBX3
INTU
HS.569313
LOC645869
TRO
SNORD114-24
FASLG
HS.187499
HS.98959
SOX17
LOC100132442
OR6B2
LOC644925
SCARNA20
ARL11
LOC100129538
PRNT
SULT1A2
LOC729373
LOC100133445
WFDC2
FBF1
SRC
HS.159057
LOC650546
CNIH2
LOC731884
LOC100133636
LAD1
LOC653325
LOC100130955
C20ORF135
HS.483183
GZMM
LOC728760
HS.99203
LOC653623
ANGPTL6
SLC16A14
LOC646299
LOC649351
LOC643749
LOC647862
ACTN3
KRTAP10-7
LRRC37B
TNFAIP8L2
MRGPRX3
TCP10
HTR1A
ING1
ADAMTS8
LOC652570
VWA1
LOC399939
NBPF7
KIAA0888
FILIP1L
LOC440895
TPRX1
LOC728832
LOC100127983
LOC402100
LOC644578
LOC728347
LOC340268
LHX9
DFNB59
AMY1B
KCNE1
LOC728677
PJA1
CD200
AKR7L
LOC646512
LAMA4
ART3
KRT18P26
C22ORF24
KRTAP5-2
KDM5A
LOC643302
CASQ1
HS.563373
LOC220998
LOC654256
LOC642628
HS.544218
LOC100129657
HS.187293
LOC653397
FLJ10916
RASSF6
HS.541506
LOC100134528
FLJ14166
LOC654088
HS.129160
LOC652742
TNFSF11
TMEM176B
SMAD1
NEUROD2
OR14C36
CYYR1
LOC100128018
LOC100129559
LOC390387
LOC649504
GH2
LOC100130172
LOC400954
LOC222967
PTGS2
LOC642730
HS.526748
MIR1269
MIR379
LOC650330
TSPAN11
FRG2B
GAB1
NBEA
LOC100132603
AAA1
BPIL1
PRH2
LOC389631
LOC340221
LOC100132870
BEX2
HS.543907
LOC647163
LOC646888
MIR561
LOC643043
PHLDB3
CCDC108
HIST1H2AJ
LOC441752
LOC100128597
MIR1234
LOC100129915
OR2L2
LOC642680
LOC642558
SNORD102
LOC651695
LOC642140
ZNF683
LOC100131588
HS.567127
FAM90A15
CHIA
PCTK1
LOC653123
SNURF
LOC100134272
LOC728255
LOC285479
HS.538535
LOC100133898
HS.576374
LOC100132292
ANKRD5
HS.313888
KIT
C4ORF22
SAMD6
LOC100131540
ZDHHC9
LOC730049
DCX
C10ORF93
LOC387876
LOC642602
LOC642480
NRSN1
LOC652127
LOC100130696
LOC651118
HS.545298
C10ORF113
LOC441056
C21ORF126
VAC14
LOC643868
HS.564848
LOC646562
LOC728522
PRKCB
FAM124B
LOC100132838
LOC654260
LOC391378
ALB
C6ORF156
LOC253724
HS.579949
LOC646982
HS.584291
HS.35496
PVRL1
LOC645450
C16ORF67
LOC285929
HS.293676
ARVP6125
FLJ40722
CRYBA2
SFI1
LOC647832
GRM3
BIN3
ZNF382
FCHSD1
ATXN8OS
TCL1B
TTLL9
HS.544030
LOC283755
ROBO1
OR10H3
ZNF182
MS4A3
LOC650721
LOC91661
SUSD4
BLOC1S3
HS.565557
FAM178B
ECM2
OGFOD2
LOC652222
DDR2
LOC729312
HS.134521
LMO3
LINGO4
SLCO2B1
LOC652195
FAM90A14
NBPF9
LOC442535
GGT3
EEF1A2
KRTAP10-9
LOC732455
C9ORF14
MATN4
SF1
TDRKH
TTTY11
LOC100133304
LOC729601
FUBP3
REG1B
HS.581935
SLC38A4
FLJ37543
HS.156773
KLF3
SLC36A3
LOC100129571
LOC644826
LOC650087
CDO1
ZNF365
LOC642367
RNF160
LOC400558
LOC100134568
AP4S1
C18ORF51
MGC3020
HS.542954
HS.541025
HS.541752
C14ORF37
CXORF30
LOC647595
LOC651293
LOC206227
BCAM
CCDC13
CD22
ATAD5
LOC650909
LOC645836
MED12L
EGFL8
ZNF862
GSTM1L
IKBKB
LOC646110
OR7E156P
AKR1C2
LOC100131094
ACER1
NIT1
LOC647908
HS.564211
LOC644753
HS.578390
STEAP2
SNORD91A
LOC647131
LOC100133569
TFAP2B
MIR595
CSPG4LYP2
LOC100132119
C8ORF78
ALS2CL
C18ORF20
TBX4
TTTY13
LILRA6
RSHL3
LOC642406
HS.437395
CRHR1
LOC644224
LOC647038
HS.541982
HM13
AMY2A
FAM75A7
LOC727821
TMEM128
MIR649
LOC643175
LOC647046
CA3
SLC26A8
LOC646208
ZSCAN1
OR6C65
TFDP3
LOC100131851
LOC652656
GGTL3
HS.98186
LOC100128997
ESRRG
RUNDC2A
LOC728615
HIST1H2BI
LOC644006
C4A
LOC442570
LOC283440
LOC100132055
LOC653539
LOC653086
OR2T8
LOC645453
LOC650239
HS.556708
RGS22
NCAM1
SPRN
LOC100130441
MIR597
HS.551138
HS.582129
PDE5A
LOC644950
LOC728160
HS.151207
CBY3
LOC150356
NFS1
TPSAB1
RDH12
LOC100131835
LOC645447
KHDRBS2
SSX2
LOC645048
LOC646350
LOC100130465
PCDHGA1
FLJ14100
LOC116349
HS.544242
MIR449A
LGI1
HS.28456
LOC642073
LOC646243
LOC730908
TCERG1L
LOC100134118
GPR84
DNAH11
ZNF136
ANP32C
HS.137466
HS.569298
HOXA3
LOC100131882
AKAP14
MIR1225
MIR1324
CBLC
LOC648354
FSHB
LOC646588
FATE1
HFE
HYAL2
HS.572073
PRAMEF13
TRPM8
LOC642344
DSEL
LOC388946
FBXL7
AKR1B15
LOC648763
HS.541834
HS.54940
HS.436572
LOC387723
LOC100130008
LOC650346
LOC644422
LOC643043
HS.145721
KISS1
LOC100130127
LOC642571
TKTL2
LOC728889
KRT18P26
CAMKK1
AMY2A
HS3ST6
LOC100131003
BTBD17
C17ORF55
HYDIN
RBMY1D
MTHFD2
LOC650457
ZBTB34
HS.383564
PTH
OR13A1
ALOX12P2
LOC387895
TRR1
CD36
RRAGB
MIR1274A
LOC100130819
DIPAS
OR52L1
LOC642646
LOC645797
HS.210969
MXRA5
SPRED3
LOC400221
LOC440918
EN1
OR2Y1
BHLHB4
HS.513580
LOC645194
FLJ42102
PPP2R3B
PKHD1L1
RORB
HS.123483
BTC
SAGE1
LOC100128701
ACRBP
SPON2
TMX1
LOC100133152
PRDM16
LOC100130555
LGR5
LOC645196
LOC653645
LOC339562
HS.160568
MT1B
LOC399937
HS.553278
KIAA1026
LOC644195
GEM
LOC643109
AGT
HS.542197
LOC642014
ABCA9
FLJ46358
LOC653471
OR8H1
B3GNT7
HS.541675
IGSF1
HS.533945
HSFY2
BCL2L10
PMS2L2
PRDM6
LOC647461
LOC643529
PPA2
SLC6A18
CCR5
C1ORF115
MIR494
LOC389730
CREB5
ACSS1
LOC100131294
LOC100134524
TBC1D28
LOC253573
VENTXP7
OR52W1
LOC729485
LOC730517
AANAT
LOC392583
LOC344967
MMP20
LOC643677
TTC21B
PRAMEF1
LOC152118
ZNF658
LOC285299
LOC100132521
GSTM5
LOC649352
LOC100131381
MINA
LOC728473
GPR152
HS.98197
HS.157621
HS.563922
LOC647995
GDF9
SNORD45B
LOC641765
SYN1
LOC653664
LOC100129514
OR52J3
PPIL3
HIST1H2BL
S1PR2
HS.558288
LOC339047
HS.128615
HS.544715
CYP4Z1
LOC728912
LOC440895
HS.60556
LOC653924
C2ORF37
LOC652737
ANO1
CRHR2
HS.327917
LOC390557
LOC100129916
IDH3B
LOC730101
LOC653125
LOC730357
LOC652682
LOC644189
EPS8L3
CSMD3
LOC401875
LOC647166
DEPDC5
ERCC-00019
OPRK1
OR4D10
TOMM40L
ZNF829
LOC647286
LOC391810
ERCC-00164
FAHD1
C14ORF68
LOC643236
KCNC3
MLKL
C5ORF45
IL21
C20ORF112
LOC643328
GPBAR1
LOC653799
LOC647190
MIR412
MYCN
LOC401101
LOC402282
LOC642778
LOC284998
DOC2B
LOC730272
PRPF4B
PDPN
GPR155
KCNAB2
FLJ20718
LOC100131389
LPAL2
C14ORF162
LOC647326
PALM2-AKAP2
LOC399937
PML
LOC652586
MTUS2
C11ORF55
LOC647677
SLC6A20
LOC651648
B3GALT5
DPYS
ACBD4
FLG2
HS.224794
LOC729792
GPR151
MGC13005
FAM101B
LDHD
LOC643008
LOC653165
GFRA1
NRG1
LOC728557
HR
SERHL
HS.565314
LOC649191
PRAMEF10
HS.572121
C1ORF187
LOC100128416
HS.22689
HS.564280
APC
LOC642849
FAM90A19
C20ORF46
HS.131074
LOC644530
LOC653051
C9ORF71
FLJ45256
LOC645390
C2
SHE
MYF5
FAM75A6
HS.197064
LOC652633
HGFAC
LOC100129285
SPN
LOC649452
HS.565395
LOC126536
HS.566008
LOC652179
LOC729837
OR4B1
PROKR1
LOC100133691
OR10K2
LOC100134414
THEX1
HS.244740
TRIM67
SNCB
INA
SLC29A4
ZNF806
PI4KA
OTOR
LPHN2
FBXW10
KIAA1751
LOC728919
HS.566225
DENND2D
FLJ44817
CLDN24
ZNF292
VTRNA1-2
MSMB
COL2A1
CCL25
LOC653480
LOC648758
MYOZ2
ZNF189
SLC30A2
SFTPA2B
PPP1R1B
LOC654172
FBXO18
FUT5
HS.552496
LOC442676
PFN2
LOC642787
HS.573255
ZDHHC9
LOC100134387
LOC728910
LOC652242
LOC642405
LOC643703
HS.577221
LEKR1
HLA-DRB6
HS.543052
HS.561108
LOC729319
LOC401911
LOC441119
ZNF383
COX7B2
TRPA1
HS.578360
ZNF238
C4ORF3
NCRNA00087
LOC644207
PER4
MGC62100
LOC646812
LOC441316
LOC730656
HS.148844
LOC728939
HNRNPCL1
HS.538176
HS.540335
KRTAP4-5
LOC100128374
MIR1276
PCDH10
HS.98563
GALC
DNAJC5G
ERCC-00081
NTSR2
KRT25
LARP1
LOC652618
LOC149950
CACNA2D2
LOC127011
SNORD62B
DNAJC5B
HS.158036
TRIM33
C3ORF74
LOC649112
LOC651044
FZD10
LOC100130987
ALLC
LOC150185
DEFB131
SLC16A12
HSN2
FOXB1
GLIS3
MAPK8IP1
LOC653483
CES3
SNORD93
CERKL
FLJ46361
MIR1205
LOC650841
LOC100131825
MIR1302-1
LOC651337
VCX2
KRT72
MIR548E
FLJ36131
LOC642883
LOC100129165
SLC35D3
RASGRF1
KCNIP2
LOC342931
LOC643581
HYDIN
HS.542001
KRTAP24-1
CCT8L2
HS.564154
DEFB106A
BNIPL
PLAGL1
LOC652677
HS.539450
SNRP70
PGM5P2
HS.574595
LOC392364
GPR81
HS.568870
HS.560319
TMEM196
APOBEC3F
LOC100128576
OR4K2
LOC100134785
LOC643596
LOC653293
RAE1
LOC127602
LOC643669
LOC644421
HS.291377
MIR376A2
LOC100128869
LOC100132702
C6ORF163
CHI3L1
LOC644167
ADAD1
TRIM9
LOC643870
LOC650410
HS.495112
MDM2
LOC643263
TRAF3IP2
LOC643235
LOC646144
TSLP
LOC100127888
LOC652579
LOC100132799
C1ORF88
LOC727895
LOC646097
LOC644662
LOC283392
LOC643015
HS.560263
LOC652540
MAS1
RXFP1
HS.209583
SNORA71B
HS.562844
LCE6A
LOC644707
LOC651017
HS.563166
KCNK12
ZNF826
LOC100131096
EFCAB5
KERA
LOC100134252
LOC645529
KIAA0492
OR8U9
PPIL5
POSTN
LOC642606
LOC650390
LOC100129381
LOC648251
LOC645868
IGSF6
ACSL5
FUZ
LOC51145
MIR486
LOC643770
ZMAT5
LOC100132707
MIR877
HS.276854
HS.543446
ELOVL4
HS.576072
YAF2
SNORD45C
PMS2CL
VAPA
LOC100131688
POM121L1P
GPR97
KRTAP19-2
NVL
C21ORF99
TSPAN32
C9ORF27
OR6N1
HS.216701
DEFB133
NMNAT3
HS.583132
CTXN3
LOC100130264
SH2D6
KCNMB2
PSD3
EGFL6
SAMD7
OR2G3
PSD
LOC729891
ST6GALNAC2
PLXDC2
LOC642093
ARL6
LOC100133779
SALL2
LOC100132229
PKN1
CBFA2T3
TRIM34
LOC374973
TTC9C
LGR6
MGC13057
HS.253999
TMEM50B
LOC440956
PCDH11X
TNFRSF17
KRT6B
LOC100133272
LOC100130712
LOC100133752
LOC650003
DOCK4
PTP4A3
HS.572883
AMAC1L2
HYDIN
LOC648223
SAMSN1
SNORA69
LOC100130764
LOC653853
LOC644886
LOC647783
IL18RAP
IL19
MIR381
RAB1C
SLC38A8
LOC652463
FCN2
NAV2
LOC440059
LOC646324
CYTIP
CSF3
PSMD12
LOC727970
CASP8
LOC391209
KNDC1
CASP4
HS.529590
MIRLET7A2
LOC643081
LOC390192
TP53TG3
LOC100134499
SLC26A9
NTNG2
LOC646560
C6ORF124
LOC652831
NIPSNAP3B
FAM101A
ZNF167
LOC649503
HS.565170
GSR
LOC644838
ZFATAS
MYNN
LOC139431
MADCAM1
LOC131185
HMX2
KLHL14
C18ORF2
GPC3
LOC646784
LOC647225
SLC25A25
LOC653353
FLJ36031
FIS
HS.112893
LPHN3
HS.547175
LOC100133565
LOC647509
MIR525
MXRA8
LOC642681
USP50
LOC554226
COL19A1
MTMR8
MIR640
TRIM5
HS.550799
ZNF778
HS.266249
HS.539444
MGC34800
TCHH
TGM7
LOC389217
HS.126415
PAGE5
FAM90A12
SNORA74B
HS.514453
LOC100128485
SLC17A1
KCNMA1
CYSLTR2
LOC729225
PCDHB15
HS.579365
TMEM176A
HS.564132
LOC729602
HS.496897
SBF2
CTNNA2
LOC100130288
LOC390414
LOC388885
LOC100129913
LOC653039
LOC100132939
STC1
LOC642245
LOC391761
GALNT9
LOC100130705
MUC6
LOC653160
HS.561033
KCNQ1DN
GNRH2
BTBD15
LOC100131691
SLC5A12
NRXN2
FLJ42957
SSX4
EPHA7
OR10H4
LOC643582
C6ORF1
LOC654244
LOC349196
LOC100130673
LOC285697
HS.411472
LOC442096
HS.224854
LOC646887
RARA
HS.562726
RPRML
LOC646501
BMPER
HS.550042
LOC646615
LOC653219
LOC649947
TRIM34
LOC729756
LOC100131460
HS.494932
HS.557481
LMX1B
LOC100131085
LOC727765
LPPR3
LOC649686
LOC100132909
LOC401280
LOC642173
IL2RG
LOC283514
TAF1C
SNCB
LOC644806
HS.308351
LOC728401
EMR4P
VPS13B
SNORD113-5
MAP1LC3B2
SEPT1
C1ORF147
LOC644153
LOC100132015
LOC401915
NFASC
MIR1249
HS.543219
MIR224
XLKD1
HS.539244
HLA-DRA
TMEM200C
TRERF1
LOC649324
WBP11
CXCL6
LOC643619
LOC729501
HS.577816
KRT26
CHEK2
NCRNA00167
NRCAM
LOC645355
NEUROD2
LOC100133438
SLC8A3
LOC440345
LOC651647
MASP2
FLJ16686
LOC650668
LOC732393
TMEM82
FLJ44450
LOC649200
LOC729176
GALNTL5
LOC643326
FBXL21
HS.575889
SYNE2
HS.580417
LOC401720
LOC441548
LOC648699
MUC5B
HS.554075
LOC391045
LOC220429
LCK
LOC728723
MIR1471
NR4A3
NTNG1
RASD2
LOC339529
MIR92A2
LOC154872
AGBL3
HS.570751
LOC643234
ABCD4
HS.121413
CCL24
LOC389105
MGC26356
SUZ12P
HS.578161
HS.254752
DDX26B
LOC100131891
GRIA4
PGA3
LOC653920
LOC732377
IRGC
LOC283116
LOC100131857
LOC652466
RAB25
ITGA11
TAC1
HS.540824
HS.565678
HS.545008
MIR146B
LOC649477
LOC728621
TEX11
FAM155B
LOC645446
LOC647384
LOC644656
RIC3
LOC729737
TRIM53
LOC652801
LOC729353
FBXO48
RAX
LOC100132329
ARSH
LOC642611
HS.559234
LOC100129278
CAGE1
FSD1
MMP23A
C2ORF57
LOC285941
CD28
LOC644813
LOC154822
LOC344423
LOC400796
PEMT
TREML3
HS.562922
SCUBE1
HS.441560
SNORD114-13
ASCL5
DYX1C1
ANKRD20B
LOC642759
UMODL1
LOC400942
LOC100130663
LOC643008
LOC100133683
PRPF4B
CFP
HCG4
SNORD109B
LOC728253
LOC651410
C19ORF55
HS.61151
LOC646057
EGR3
LOC727831
HS.555595
TCL1B
ZNF469
ARSD
ARHGEF6
LYPLA1
RGSL1
CABP2
MEG8
CXCL5
AIFM3
HS.133324
RPL23AP13
LOC339692
LOC643018
LOC647244
JAM3
CD48
PTCRA
LOC650526
LOC730909
SNX7
TMEM220
HIST1H2BA
LOC23117
LOC100132086
KIAA1245
MIR579
SDHALP1
CDH7
MIR548K
C21ORF129
FAM86B2
GAS2
COL12A1
OBP2B
HS.564018
LOC100128326
LOC644019
KRT19
DNAH10
HS.570762
LOC646588
GRIK3
ATP6V1G3
LOC100134366
HS.443534
ABCA5
HS.150734
FLJ33996
RPL31P10
LOC729396
SUMO1P3
HNMT
SLC22A9
TUBGCP6
SH2D7
C16ORF65
LOC728539
LOC729569
CAMK2B
MIR200C
LOC340204
ENPP1
C8ORFK29
GRM7
PCBP3
HS.580290
HS.429450
FAM139A
LOC100134406
LOC100130453
LOC100128140
ADAM32
HS.568387
WDR54
PRB2
SUSD4
LOC653464
LOC401845
HLA-DQB2
LOC100131986
LALBA
HS.539760
HS.577328
HS.543063
LOC388503
LOC652191
LOC729088
TMIGD2
LOC100133070
PGC
PRM3
GGT1
HS.334998
SYCP3
LOC647448
DEFB137
CCDC111
MTL5
LOC653394
LOC647843
CABYR
LOC645393
LOC649203
GPR62
POM121L2
TSHB
HS.582596
LOC644415
TRIL
LOC647624
LOC728763
LOC441344
HS.438858
PAK2
UTS2
LOC645744
C21ORF77
ATP1A2
LOC645447
FSHB
LOC131909
LOC391746
PELI2
LOC728369
KIF2B
LOC644500
PPFIBP1
KIR3DL3
RUFY4
LOC646438
BSND
RKHD1
LOC643495
SPINT1
LOC390937
HS.567436
LOC651125
MGC4677
NKPD1
FAM3B
LOC652450
GOLGA6B
ATP6V0A4
LOC651872
PSD3
METTL11B
F2RL1
HS.583158
MOBP
TLR8
WHDC1L2
LOC100130229
CYP20A1
LOC652141
SRD5A2
HS.551358
KCMF1
HS.22928
ERCC-00098
PDZD3
GPR82
LOC100129979
LOC388572
ZNF226
LOC644396
LOC100131271
LOC650787
PLEKHH2
LOC100129665
HS.545388
LOC653143
LOC642196
MAP3K7IP1
LOC650739
LOC650580
LOC255326
HS.581067
LOC642411
ZNRF4
ETNK2
OR1D4
ZNF773
CHTF8
LOC651537
BEAN
LOC651747
FLJ90036
DRD4
GRM7
LOC643429
PREX2
ATPGD1
LOC100128714
HS.574341
HS.567186
FAM90A20
LOC729141
ABCB1
C8ORF62
A3GALT2
DDHD1
FLJ41327
PIAS2
FDXACB1
HS.345700
ALS2CR12
SNORA36A
ZNF452
RGS12
LOC645492
DEFA4
C20ORF103
IL12A
SEMG2
TTTY10
C22ORF33
NAPEPLD
RSAD2
CYTL1
LOC100129722
ZMAT1
FLJ13614
LOC100130217
[truncated: 18,314 more rows]
