# Supplementary material for: Association of SNPs in the PAI1 Gene with Disease Recurrence and Clinical Outcome in Bladder Cancer
Source: Int J Mol Sci. 2023 Mar 3;24(5):4943. doi: 10.3390/ijms24054943 (PMC10003630; doi:10.3390/ijms24054943)
Supplement: Supplementary file 1 [file ijms-24-04943-s001.zip › Supplemental Table 6.xlsx]

## Sheet: 5637
Supplemental Table 6: The list of DGEs between WT and rs1050813.
PTPRU
CAPN7
RBM23
ARHGAP19
ALKBH7
SNRPC
FCGR2A
PODXL
ZNF146
SNX4
HSPA13
LOC100128266
ABCG1
LOC729964
HS.103173
WDR79
SPRR2E
NSUN5C
OSBP2
LOC91431
LOC653262
AQP2
SETD2
C14ORF138
PEX16
LOC100131271
LOC345041
EPOR
FAM195A
UBE2L6
PERP
HS.14555
SNIP1
YIF1B
LOC645196
PLSCR4
VPS24
CXCL6
ERCC-00170
TINP1
NOL8
TPST2
ACTN4
CCDC88C
LOC100131205
USP21
PABPC1
KIF20B
USP18
RBM23
NFIL3
PAFAH1B1
FGFBP1
LOC728661
IFI44L
POLR1C
PLEKHF1
SPRR2D
OAS2
MCL1
LOC653270
AMD1
PDSS2
MYO1B
CHORDC1
CDC123
ZWILCH
TMEM189-UBE2V1
FKSG30
LOC441957
SLBP
SNRPD1
HS.552957
PKIA
FBXO11
PCMTD1
RAD21
LOC647854
EIF3K
CRABP2
FEM1C
CDCP1
HNRPUL1
DLC1
LOC402175
LAMP3
ISCA1L
WDR51A
PCNA
HOPX
CDA
UNC5A
CUL2
ABCC1
FER1L3
HOXB5
FAM188B
SPRR2F
C9ORF100
LOC728666
LOC652152
PDZD2
SYNE2
BBS2
MVD
C15ORF52
MARCH3
PI3
AGGF1
FAM10A4
OSBPL1A
CSRP2
COCH
LOC100129022
MED20
HSPA1B
BAMBI
DBNDD1
H2AFB1
TGIF1
ORC3L
FAM109A
FLJ20489
AKR7A3
TFAP2C
PARP10
RPL23A
RPL10A
SERPINB2
CTSZ
UQCRB
DHX8
LOC391075
BANF1
HSP90AA1
PTP4A3
ITPRIP
APLP2
XPNPEP1
ZNF232
YWHAG
HS.356079
MAN2A1
KIAA0194
RCL1
RPS26L
ZNF449
LIN37
L3MBTL3
MPZL1
TP53I3
CNIH2
PRDX3
XPOT
FRAT2
SNORD100
CENPF
FLNC
LOC220433
UGCGL1
ZFP36L1
FAM57A
ETV4
GAR1
ELP3
HS.146949
MRPL32
SMARCD2
AASDHPPT
SLTM
KIAA1211
ADRB2
PSMC4
NFATC2IP
CMBL
RPL23
CNIH
LOC100131196
FAM111A
DSTN
LOC729859
MYCBP2
COMMD3
OAS3
SLC1A5
GPR81
SLC7A6
PDE4B
BLVRA
LOC347376
PRIM2A
LOC399959
SLC29A2
TTLL5
BCAS2
SCP2
FLJ10081
FNDC3A
YES1
LOC729926
LOC728006
LOC651213
GALK1
UNC93B1
AP3S1
KIAA1267
KIAA1522
TTC26
LOC728553
LOC654103
RFESD
PTPRE
LOC730754
RICS
MYB
C9ORF58
FAM131A
GAS1
MBOAT4
SLC35F3
NR2F2
TMUB2
MIR548F4
HS.572538
GRINA
FANCG
PAPPA
DCBLD2
ZNF786
AKR1C3
KCNK1
CTDSP2
HLA-A
RBCK1
C14ORF133
C11ORF41
BAT2
PNPLA6
PLEKHJ1
LOC647488
MYADM
DLEU1
C13ORF27
KIAA1430
LOC653071
LOC649970
UBE2C
SKAP2
UROD
SCARB2
PTS
COL4A2
RAB5B
AARSD1
MX2
AFAP1L1
CYP26B1
KBTBD4
C14ORF147
LACTB2
MAP3K1
HS.549668
CCBL2
PTMA
LOC389322
LOC283174
EPHA1
INTS3
CXORF50
PHKA2
BTG3
MLLT10
CD200R1L
GPR81
SIK2
RELL1
LSM12
GK5
MANEA
LOC100128354
SH3KBP1
NACC1
CIC
BCOR
PRRC1
C1ORF53
DUSP10
SPRR2A
NIPA1
LOC642817
IFI44
CADM4
LOC100133163
HS.213541
C12ORF32
LOC643284
CNPY2
TRIM39
MRPL35
PDCD10
USP14
STK33
HS.28456
SLC6A17
RPL13
DFFA
PRRG1
LOC729616
FUS
CD68
PARP3
LOC23117
ZUFSP
IL29
MTMR6
LOC645644
EPM2AIP1
KIAA1967
LPL
SMAD5
RPA4
FLJ20254
DYNLRB1
SLC10A6
USP34
MCAM
RGS4
C2ORF49
KIAA0953
CD276
FLJ40504
CD58
ERLIN1
TCFL5
LOC644976
SLC43A3
NDUFB10
SULF2
GUCY1A3
MTHFD2
WNT4
VPS36
CTNND1
PANK4
IP6K1
CDK7
RSRC2
FBXO28
RAP1GDS1
AP1M2
RRAGC
NHLRC3
SBF1
PBX1
CFB
PPA1
NCOA1
FAM113B
FBN2
SBK1
ZNF823
MR1
KRT6A
LOC728457
DCUN1D4
CBX2
TUSC1
SULT1A3
LOC645387
ACLY
FAM102A
CFLAR
ALG10
SPRY4
HS.529743
HERC6
ADCY1
IL7R
CDS2
VCL
RHBDF2
C22ORF9
TAF9B
RAB5C
RGS12
UQCRH
HS.575095
ANO6
LOC100130886
LOC647678
LOC100130009
SPATA5L1
LOC728615
LIMS1
ZDHHC24
LOC646342
HS.485155
JMJD1C
FBXO11
MRPS18B
CXCL6
FKBP3
TERF1
NFX1
TGM6
ZFP36
MLEC
C15ORF48
TCTN3
MFF
SEPT3
LIPG
PDCD10
SDHC
MAP3K8
ASTN1
LOC653778
TMEM158
LOC158345
PPPDE2
THNSL1
RAD54L
ZNF431
RPS6P1
KRT75
LOC652388
PHIP
HECTD2
LOC100130679
TSC1
CXORF64
USP48
PDCD2L
LOC644039
HS.569271
RAB2B
NOTCH1
AP4E1
TRIP10
TIAF1
LOC643596
ASB3
FADS1
ORC6L
SLC4A7
PNKD
SSX2IP
LRRC57
RAP2A
C14ORF4
CDH7
LOC647000
BBS10
LOC643384
LOC390760
ARMET
LOC100131261
MBP
ANXA11
CDH13
OSR2
LOC401076
FNIP1
DCP1A
LOC728014
STAT4
LOC647856
TMED7
DYRK3
LOC647673
PAQR3
PARP9
CTGF
ARL8B
PHYH
SEPT5
IVNS1ABP
LOC730076
MAMLD1
PHF12
TRIM45
LOC100131390
NAPA
KBTBD11
FAM134B
HS.4988
ARHGAP8
PRKDC
PTGES3
ADNP
RAI1
TBC1D2B
HS.294103
SYAP1
TBCE
H1F0
PARP3
VAV3
MATN2
WDR59
NLRX1
HMBOX1
SGK3
SDF2
HS.535028
NETO2
LOC653820
RNF130
LOC653232
MAPK1
RPS6KA2
PRRG4
SOX4
UGCGL1
RIN2
LOC100128956
CDC14B
CHD4
DEK
ANAPC11
RAB11A
CDC2
TRIB1
IER5
MPHOSPH8
CP110
SFXN5
PSMC4
LUZP1
LOC728128
WDR36
LOC100131326
EIF3M
PRPF19
BAHD1
LOC439953
TXNDC5
ETFA
CBL
USP12
ZNF311
LOC647340
PANK1
FOXQ1
BARD1
DCLRE1A
DCP2
MAPK9
TLE1
DNAJA3
LOC644877
HS.121144
ASAP1
ADAR
KLHL11
SON
ABHD15
LOC100127923
FAM104A
RBBP4
ODZ3
ZBTB2
C20ORF11
MORF4L1
SIPA1
LASS6
VAMP4
G3BP2
DKK3
MAP2K5
HRSP12
DEDD2
UBR7
TBRG1
MUC16
TIMM8A
FAM18B2
LSM2
STXBP1
FCHSD2
HS.574590
BACE2
P4HA2
DNASE1L1
SYVN1
CACNB3
HSD17B7
PDE4D
HS.569953
ACP2
LOC100132041
LOC100133328
LOC440731
LOC650157
LOC554203
VAMP4
SLC33A1
PTP4A2
NARS2
PPP2R5A
PBX3
ANAPC1
TMEM184B
ZNF816A
LOC648659
SULT2B1
MOGAT2
LOC100131541
LOC653206
PKN3
EFNA4
SLC25A44
ACADM
STS-1
ALDH4A1
KIAA0692
CCDC17
SLC15A4
KIAA1310
KIAA0020
LOC648733
PPAT
LOC642456
ABRA
MLEC
HS.581657
KAT5
ALPK2
ADIPOR2
SERPINB6
VIM
LOC728658
CEPT1
SNORA18
DMAP1
LOC391370
JARID1A
CYB5R4
NIPBL
CASP1
C4ORF34
ARHGEF3
TWIST1
ADCY1
LOC148430
LOC729086
KYNU
SIPA1
LYSMD2
LOC729680
TTF2
LIG3
TMEM16A
LOC441073
MED31
RPL13A
LOC729057
TAOK1
HSPA4
CXCL5
ATP1A1
RGS11
UBR5
SHISA2
FAM43A
ID2
HS.370359
TCF3
HS.25318
ENDOG
ZNF668
MGAT2
RUSC1
HSPBL2
SLC26A6
ACACA
RBM12
DDX60L
TMEM101
PROM2
ZNF217
FAT1
UBAC1
PFKFB2
HIBADH
SOX7
C14ORF135
TOMM6
HADH
PDCD4
HS.575253
BLZF1
INTS8
AKAP11
F2RL1
DPYSL2
PARN
LOC653324
YPEL3
TMEM199
FLJ22795
FUT8
CMAS
SEMA4C
LOC729340
ZC3H15
NUFIP2
HS.571376
MYC
LOC100131387
KLHDC5
KRR1
ANKRD9
SRPX
MATN2
LOC730255
SLC9A6
SH2D4A
C17ORF100
SORBS2
KCMF1
HNRNPA2B1
WNK1
PMEPA1
ZBED5
TGFA
OSBPL5
GCM1
ADCY6
TFIP11
APPBP2
TMEM217
ABCC4
LOC644650
HS.582113
ARHGAP10
MGC10997
LOC148413
CDH2
LCLAT1
GPR110
LRIG1
COL8A1
LOC390345
SPIN4
LOC729487
MSL3L1
ICMT
MIB1
PODXL
MRPL50
SLC29A4
WDR4
HS.60257
BEND7
FAM86A
TTC4
RBM41
KCNJ15
KLF6
UBFD1
RAB34
NCRNA00219
CHM
FTHL2
HMGB1L1
MRPL36
LOC286135
OSBPL5
MTP18
LOC729816
LOC100134560
STAMBP
RPL7A
SFXN3
HS.91389
LOC100128936
LOC730083
MGC87895
MAP2K1
APOBEC3B
CCT7
CD2AP
WSB2
LOC729397
HS.436448
SHANK3
C14ORF106
PSMG4
TOPBP1
IL1R2
FLJ11783
RAB7A
GCC1
SLC39A8
NUP153
KIAA1797
TRIB2
ATP6AP1
IFNAR1
FAM160A2
GTPBP3
DSCC1
NUMA1
PPAP2A
VASH2
TCP1
ZNF276
ZNF286C
SDSL
METTL1
SLC37A1
LOC728597
NUP35
DGCR8
RAB4A
SLC12A8
KIAA1026
TAF6L
LRRC37A4
CDCP1
XBP1
NAB1
TNS1
C6ORF173
RAB3IL1
EIF3H
ACO2
C4ORF27
MGC42367
HS.436379
ZKSCAN4
FLRT3
ZNF33A
VPS8
EGLN2
SLAMF9
HS.473191
BAT2
TPBG
RBMS2
SIX5
CNTNAP2
LOC151162
CNPY3
WDR6
RALGAPA1
DDB1
TSPAN13
NUDT21
STC2
SLMO1
HS.105791
PAK2
NUP37
IL6ST
DGKH
ZNF529
NECAP1
SP110
KIAA1147
KIAA0831
EME1
TMEM185A
RBM9
BRI3BP
MPZL2
ZNF496
SNX16
XPO7
SNORD31
CDKN2A
MIR632
DUSP10
VPS13B
LOC729535
KCNG1
PASK
COMMD2
NPC1
SLC38A2
NCKIPSD
B4GALT5
TRIP6
INTS6
SAMD1
TMEM135
LOC648745
NFKBIL2
SIN3B
ANTXR1
VPS37D
ZC3H5
SLC25A19
ADAR
ST3GAL4
LOC100129095
HADH2
CDV3
PLAC8
LOC643287
LOC100133185
HS.559714
C1ORF115
ELOVL6
LOC644813
OCIAD2
TMEM50B
LOC648822
KCNQ2
SPCS1
MGC102966
PTPN3
EIF2S3
SNRNP200
ANK3
C4ORF41
AKAP11
LOC401019
TEX264
HS.552799
PLEKHA2
C3ORF17
LOC727758
IGF2BP3
PPIE
GEMIN4
HS.440088
ARRB2
CTHRC1
CHST15
LMAN1
ATP5S
LOC390705
CLYBL
NOX4
HEBP2
LAMA1
UBE2D2
NAPRT1
AHNAK
LOC100133803
GPAM
TPT1
IL24
SNORA57
BCL7B
AK1
PDCD6IP
BAG5
ANXA3
LOC644774
LOC100128163
ASB7
HMGCR
SLCO4A1
DNER
PTPRA
TMEM55B
LOC440498
SOX7
QPRT
RFC1
CCDC101
LOC285741
LOC143543
ACSL3
LOC642333
C5ORF34
TUBB2B
LOC100132742
CENTG3
ATP6V0C
FYTTD1
RAB11FIP1
METAP2
DDX60
ABAT
TOX2
EIF2AK2
NIF3L1
AVL9
TMEM165
SHF
ACACA
LOC100130288
SLC5A12
RPN2
KIAA0513
SEL1L3
PKIA
HIST1H2AM
ANKRD32
GRINL1A
CTBP1
TSPAN14
NECAB3
SPP1
PDXK
C14ORF104
BRPF3
LOC651951
UBE2Q2
TSGA14
IL27RA
APBB1IP
SLC37A4
PPM1F
TUBB
LOC644990
MYCL1
PDLIM4
TCEB1
SH3GL3
FAM49B
HOXA5
GTPBP3
SLC45A4
ATP2B1
SP1
GPT2
SPC25
ELF1
APOL3
PPIC
TDRD7
IL1RN
AP2B1
PLK1
ARHGAP12
NAGK
FBLN1
CXORF26
CYYR1
LOC646993
SNX3
GBP1
TUBA4A
TOMM5
S100A2
SPEN
MAMDC2
LOC100131787
SLC35C2
RNF38
AP3M2
PLAT
CCDC6
TTC3
LOC728429
DYNC1H1
ZNF24
CRIP1
ABLIM1
CSK
LOC284297
SNORD80
KIAA0182
KIAA0100
SEP15
LOC652624
HS.572073
FDFT1
SEPT3
C7ORF68
LOC391532
STAG2
AP1S2
EWSR1
ITGA3
WWC3
LOC731985
LOC647894
ELAC2
ARRDC4
CENPM
NR2C2
TNKS
USP32
BRD7
TSPAN13
FBXL5
DYNC1LI2
KCNMB3
CNBP
ARHGEF6
CHST12
VPS13A
ARHGAP23
HUWE1
C2ORF15
TNC
AFAP1L2
FKBP3
ADORA2B
NLGN4X
ZNRF3
PDCD2
RBM33
LOC653171
STC1
SBSN
PLEKHH3
MESP1
URM1
FAR1
IL10RB
PSCD1
MKNK2
GTF2B
ATP6V0B
LOC731751
INTS4
POLR3D
DPM3
SERF2
RNF216L
LOC730740
RBM18
CRNKL1
HAUS5
ZNF519
MGC39900
RPL14
RPS23
LOC100132795
PAK4
LOC728689
C1ORF106
IL13RA2
C1RL
LPAR3
LGALS3
PHYH
PLSCR1
ERP29
EFEMP1
B4GALT7
MRE11A
SAP30L
ITGB1
HS.572030
MOBKL3
POLDIP3
STRN4
HS.581671
FAM104B
MOGS
CARHSP1
DNAJC30
E2F8
GIYD1
OASL
FLJ43681
LOC648253
TCP1
BTAF1
HS.137971
HS.475334
UBA1
SUCLA2
LOC650832
TMEM203
IGSF9
HS.225083
CDK5R1
AKR7A2
YAP1
KIF11
PSMA3
NAMPT
RGS19
SLC46A3
NCOR2
LOC653888
ATAD2
BRP44
GJB6
BET1
ITGB5
NOC3L
SULT1A4
SP100
C1ORF107
TAF5
LFNG
C14ORF109
RAB23
ADCY9
EXOSC3
PRIC285
SSFA2
LOC100132863
ANKRD13D
SNRNP27
NFAT5
EGLN2
AEN
WEE1
LOC731139
TP53
LOC728115
LOC730316
EMID2
LOC441455
PPP2CB
SFRS10
SUMO2
RHBDF2
TRIP12
LOC729900
TFAP2C
MIR302D
KCNK10
UNC93B1
TMEM171
ACBD3
ZSWIM1
LOC391825
COMTD1
DNAJC5G
ZSCAN2
FRAG1
ESYT1
B3GALT6
IL18BP
ZFPM1
RBM47
ST7
AKAP13
COL13A1
FAM120A
LOC729236
RNF34
PTAR1
LOC729793
CACYBP
EBP
HNRNPF
SYTL4
EPHB4
KIAA0947
LOC651621
ARAP3
HS.537638
LOC729776
MAST3
GNG11
FBLN1
UBB
RAB11FIP2
C6ORF61
RAB38
MBD2
TBC1D3C
SUCLG2
FAM108C1
NCRNA00120
CCNG2
C17ORF101
YIPF3
SYNJ1
PLCL2
CSTF3
LOC650177
MTERFD1
TGFA
POLR2L
CASP3
TRIM33
CD97
SF3B14
DAB2
SYPL1
POLR3H
RPL10L
ATF4
KIAA1026
DOCK5
C16ORF53
LOC100133232
C1ORF203
SENP5
ZNF532
ARF4
LOC641922
GPBP1L1
C7ORF47
TAF4
ZMYND19
ARMC10
TRRAP
RRAS2
SUSD3
SNORD38A
ZNF550
AGFG1
PRCP
GGH
TANK
MIR497
PHF16
GPRC5A
C10ORF6
ATP4A
VGLL2
HS.481464
HS.543844
LOC654244
LEP
DDX19-DDX19L
SQLE
PSMB6
PTGFRN
PPP1R9A
GNAI2
C9ORF5
NDUFA10
LOC100129502
KRT5
BEXL1
CAMSAP1L1
CLK4
DARS2
MLLT6
C17ORF95
AGPAT1
RNF145
LOC100133070
EIF2C2
C1ORF216
ANAPC13
TAF1B
SCYL2
PPARD
MARCKSL1
DHX36
C14ORF43
LOC648980
SKA1
PHLDB2
OAZ2
LOC648771
LOC100130919
CDC42EP1
PPCS
LOC100130707
ZNF621
BIRC6
LOC400948
LOC644214
NEK8
MORN4
HMGB3
ACTA2
APOBEC3F
HLX
OSTF1
GARNL4
FZD7
MITD1
TNFRSF11B
C21ORF66
FAM45A
LOC652864
DLEU2
DHX34
IPO11
FAM96B
LOC728565
SULF2
LOC25845
GJA1
KIAA1468
ZNF775
HS.130916
TBL2
DIP2B
PLEKHG3
SOX9
PRAGMIN
EXT2
SARS
ABR
AIF1L
BRIX1
LOC100130494
LCLAT1
SRPR
SPAST
MTAP
GPC4
LDOC1L
RCHY1
ZIC2
SNORA3
CHST7
TACSTD1
DNAJC21
RNF144
CTNNB1
CCDC109B
GNA11
SLITRK5
BIVM
ATP6V0E2
UBE2C
DDX19B
LOC642755
C10ORF76
LOC731314
C10ORF67
MKRN1
EXOC2
OTUD1
OSBPL2
HS.397465
C11ORF24
MAPK1
TTYH3
RAB11FIP5
DLK2
PDCL3
EED
S100P
PRMT6
CLP1
C12ORF23
ANO9
JARID2
CDV3
ZNF215
C9ORF23
RNF214
MBTPS1
PURA
NUP133
TXNDC9
TMEM194A
RPF1
MFGE8
ZNF223
LOC650029
U2AF1L4
PPP1R14C
FBLIM1
TSPAN9
LOC643357
PHB
PIGB
UEVLD
ELAVL1
SSH3
RBM25
UBR2
SNX6
HN1
MGAT2
ALG5
CDK4
LOC390183
LCN2
RGS12
LRRC41
TCEA2
CYB5R3
MUC4
SPRY2
HS.348514
FAM86B1
ITGAV
CSE1L
DHRS4
XRCC1
MEX3B
PRIM1
SLC44A1
CEP78
LOC389787
CD59
NDRG3
ZNF575
HS.583554
CCDC97
CKLF
LTBR
C1QTNF6
LYPD3
RPUSD4
HIC2
BIVM
LOC642513
CSNK1D
SLIT2
POLR1E
FBXO5
DDX3X
ASTN2
VPS26A
LARP7
LOC645058
NT5E
SLC12A2
ZNF706
LOC400455
FGFR1OP2
UNG
LOC613037
TMEM118
AIFM1
CCDC90A
AAMP
PWP2
KIAA0406
EIF2AK4
CALML4
WDYHV1
PIGQ
FVT1
COQ10A
TM2D2
RPAIN
SH3PXD2B
SRC
DDX19A
USP42
ERI3
DEF8
ETV5
MYO5B
ACSL5
CBLC
COQ7
LOC100132240
LYRM4
ATP2B4
ZNF319
FAM156B
C17ORF53
PIK3C2A
ASB9
MAGMAS
PIGU
SNX7
TIAL1
C14ORF166
GAS1
LHPP
IP6K2
ANXA2P1
ATP5G2
ZNF627
ATP2A2
NUP210
LOC92755
HNRNPU
C6ORF108
SLC25A13
CHST3
DMAP1
CMIP
RAB21
PHF2
REXO2
FLJ46347
NR3C1
CEACAM1
PLCG1
LIPT1
CTSL1
TPRG1L
PARP9
PRMT2
TSPO
DZIP1L
CCDC16
CDK5RAP3
ALKBH8
STK36
MIR1290
HDDC3
CRTC3
HS.259679
OSTC
NUPL2
EIF3CL
C14ORF169
HS.552282
LAMC1
ISM2
GRN
WHSC1L1
PARVA
STRA13
GTF3C2
LOC399988
JAZF1
SLC45A3
FHL2
C10ORF47
LOC338870
ZNF512
LOC728026
ZFYVE19
TMEM132A
C6ORF111
LOC389816
UBA3
RRBP1
MKL1
CDC42EP2
MED22
ADCK5
HS.57079
POLS
LOC644799
MAP3K6
UBE4B
CRIPT
SNHG3-RCC1
DAK
TUBA1A
ZSWIM4
TMEM154
DAPK1
PPIL5
CENPQ
TLK1
LRP4
UPF3B
PLOD1
TXNRD2
IFIT3
PGK1
PIGF
GPR56
HEATR5B
MALL
LOC728672
C17ORF51
ITGB1BP1
NHLRC2
ACOT7
PROCR
SAAL1
ARFGEF1
RFXANK
IDE
CDKN2B
PCNXL2
LOC729768
ARMCX3
FAM136A
C6ORF168
RNPEPL1
MOBK1B
HS.342412
KIAA1618
UBAP2L
C1ORF93
MUC1
SLC30A1
KIRREL
CACNG1
PTPN4
TBP
LBA1
SPIN3
IL18BP
PEX11B
TCEAL3
AGT
CALR
RFC3
HEG1
CHES1
INTS10
RBM45
TROVE2
LOC646550
PTPN12
COL8A1
TAF10
LOC392437
CLASP1
PTPMT1
PSPH
BYSL
SIRT1
PIWIL4
AMY1A
SIVA
HS.324250
LOC646483
C19ORF40
CRISPLD2
C17ORF62
SON
BRI3BP
OCRL
ZNF672
DDIT4L
HS.121667
LOC100130550
HS.417262
TMEM177
MT1X
DVL2
ZNF652
STX2
FBXO11
ATXN3
PGBD5
TACSTD2
GDI2
LOC645430
DHCR7
ZNF323
LSMD1
CKLF
MAGEE1
DFNA5
NSUN6
SALL4
SULF2
TMED10P
PTGES2
SQLE
FAHD2A
MAP4K5
GJB2
LOC100129342
ZNF561
COL6A1
CNOT7
SEPT11
FARS2
RALGPS2
C1ORF124
HS.570107
DYNLT1
LOC100132499
UBE2C
ZMYND8
LOC441511
C2ORF29
AHI1
TOP2A
TMEM214
PHLDB2
PELI3
CUGBP1
KIAA1826
NSUN5B
ZNF443
LOC654256
TMEM167A
SHISA5
FAM89A
ZCCHC7
ZSWIM6
OGT
HSZFP36
ACTG1
LUC7L
LOC646294
OXR1
LEPR
TMBIM4
LOC100130525
SNHG8
MGC18216
CMTM5
ALOX5AP
ALKBH5
HERC2
YIPF4
HSPA5
POGK
MRPS36
LOC729992
CNIH4
TIMP4
COL12A1
FAM117B
ODF3B
FH
CELSR3
RNH1
FASTKD1
HOXD4
MT1G
LOC441506
MPZL2
STX4
SPCS3
GTF2I
AZIN1
THAP11
NUDT22
HS.554507
LBH
S100PBP
FYN
SEMA4D
MYO19
LOC442232
KL
ZNF200
CYB5A
LOC100132973
PRUNE
BAT2D1
PTPRG
RPL34
GCET2
ASAP2
RHPN2
WDR24
CYP20A1
SFRS18
UBE2H
GTF2A2
RALA
LOC645313
CCNY
RBM14
FAM89A
PMM2
COL7A1
C1GALT1C1
SNCA
CNIH2
GABRE
MFSD1
UBR5
THOC2
ING1
NEK2
DPP9
TMC2
LARS2
C18ORF62
ANKRD1
PPM1A
COPS4
PARP2
HLA-A29.1
LOC652672
RNPS1
LOC642420
SMEK2
LOC401127
LOC402665
NGFRAP1
TMEM19
HMGB1L1
RNF5P1
CRYBB3
IGSF8
NAV2
MUS81
PLD6
ICA1
NRCAM
C2ORF24
SSR4
CDC2L5
LOC100128410
EIF6
LOC641768
RAI1
HS.513971
C5ORF13
C19ORF42
LY6G5C
RTN4
URB2
PLEKHA1
LOC646849
LOC440145
PSMA2
KIAA1949
SPSB3
TSSC1
ZNF362
C7ORF28B
LOC731640
NXPH4
MRPL52
LOC729806
RGS17
CLK2P
PPP1R10
FOXD4
TIMM17B
TFIP11
MACF1
LOC728481
PDLIM7
UHRF1
C21ORF58
SRF
GLIPR2
ATMIN
GRK6
IER2
PNKP
BTF3
FAM111A
CENTB2
IRF6
ITGA5
C8ORF76
THY1
CSNK1E
AARS2
ARHGAP5
HS.543956
HS.145049
MSI2
SIRT5
H3F3B
C9ORF27
LOC127295
MIR425
PFTK1
CEPT1
TIA1
SEMA4F
CCDC34
TROAP
TTC31
C6ORF130
PSMA3
TTLL12
ASCC3
FGFR3
LOC648526
EXOSC5
KIAA0101
DGKH
LOC644988
CTDP1
IL2RB
HS.558212
BCAR3
DIP2B
SNORA59A
C10ORF58
ACN9
CCDC91
USP48
NDUFS2
HLA-H
ZDHHC9
GMFB
NCK2
LOC728518
PIK3IP1
FEZ2
FNBP1L
CCT7
RHBDF1
DPY19L4
FOXD2
XPR1
CDCA4
DENND4B
RAB31
HMBS
MYD88
ACSL3
CDC42BPA
MIF
ATP2B4
CEP68
CACHD1
ADAT3
S100A14
IL13RA1
APOOL
C21ORF33
SIDT2
NOMO1
P15RS
MME
GAS2L3
LOC440927
C12ORF26
EIF4A1
LOC388559
LOC284023
ZNF250
MMP15
LOC648695
RPSA
CENPM
RSBN1
[truncated: 10,383 more rows]

## Sheet: UROtsa
Table S6. The list of DGEs between WT and rs1050813.
DDIT3
HERPUD1
SCARNA27
HERPUD1
TELO2
HS.565314
LOC100128354
LOC642711
INHBE
ADM2
CHAC1
DYRK2
LOC100130494
STC2
HS.450769
CA9
LOC727831
SUFU
FLJ35282
CYP2C18
RNF133
NT5DC4
LOC644856
FRG2C
TNFSF12
MIR548K
PPP1R15A
LOC389631
ENPP5
HS.580375
HIF3A
HS.545899
OTUD7A
PTPRU
PTH1R
CSF3
LRRTM3
FLJ22662
STK24
LOC647834
DNAJB9
CCDC54
HS.543446
SESN2
MTMR8
LOC651881
CH25H
FLJ40606
LOC100133005
ABCB9
HS.540722
LOC651272
LOC100129916
NDUFA4L2
LOC392583
LOC100129699
LOC221981
HS.579949
OR14A16
LOC646276
HS.566008
HS.511717
HS.542928
SNHG1
DOK6
LOC642759
TRIM64
ASNS
CPEB2
DEFB1
LOC644623
MSL2
APOC4
LOC729597
LOC100128244
LOC442609
CLPS
LOC647810
LOC653853
LOC650458
MIR188
LOC400743
LOC650427
LOC400942
HS.564680
SNORD38B
NRG3
LOC653623
DKFZP686O1327
HS.560817
LOC645797
CCDC116
YSK4
RHBDL3
HS.541352
POLR2J4
SNORD59A
LOC613266
LOC100131479
LOC647868
LOC346157
C21ORF99
LOC648852
LOC650860
SAR1P3
LOC730535
HS.545009
TPSAB1
LOC100134157
LOC731366
DDR2
HS.560266
UTF1
GNA14
GPR15
C20ORF85
FLJ42102
LOC728103
SLC22A7
LOC643577
MEPE
LOC643093
C11ORF40
HS.560046
SNHG12
LOC645971
CHRNG
DEFA5
XAGE1C
RNF19A
DKK2
ZNF136
HS.383564
TPR
LOC652859
LOC100133669
STX16
LOC642509
LOC100132807
LOC643412
LOC642399
DIRAS2
TPTE2
RGR
ATXN3L
HS.579904
TIMM13
LOC650942
LOC643275
HS.574595
HS.551307
TMEM80
LOC652512
HS.578698
AKR1D1
LOC440059
TMF1
STGC3
LOC649923
CES4
CCL18
MEPCE
LOC100133690
MGC4294
DSC1
UGT2B15
PEG3AS
HS.563438
CA12
LOC644291
LOC643037
RRAD
HS.544137
HS.560106
OR51Q1
HS.543109
SGPP2
LOC644981
SP3
LOC648553
CRYZL1
LOC100127984
RBMY1J
LOC654335
PRLH
GSG1
HS.373429
MIR320C1
LOC641750
LOC100130591
LOC728929
SLC28A1
PRSS36
AKAP11
HS.574636
LOC650776
MIR135A2
PTPRT
LOC648169
C18ORF2
HS.542001
LOC642659
VSNL1
FLJ35429
LOC647444
HOPX
LOC646933
OR2T6
HS.572444
LOC645188
CCR8
HS.292037
TP53I3
HS.570751
UGT1A6
MIA3
PHF7
RAB38
LOC647130
LOC650005
NSF
FAM162B
TMEM191B
DKFZP686J0529
VN1R5
FLJ23754
BLID
HS.545759
HS.37648
ACHE
LOC643449
ADAM19
HS.549435
HS.62645
SLC25A45
TMEM213
C9ORF109
LOC100128526
LOC729373
LOC100130214
HS.547797
KIFC3
LOC100133761
INE2
LOC643377
GALNTL5
LOC442283
EXO1
LOC643234
HS.543093
LOC645837
ADH1C
LOC100130102
LOC728889
LOC644946
HS.575808
LOC653689
C1ORF88
PPP1R2P9
LOC400221
HS.568810
LOC652811
FBXO25
THSD1P
LOC387761
LOC285205
CHN2
SNORA28
HS.552336
LOC645459
LOC728592
LENG9
HS.161803
LOC652679
SLC16A12
LOC644068
LOC127406
PSMA1
PIK3C2G
MIA2
DPCR1
LOC391352
C6ORF170
LOC728317
HS.538176
LOC100131980
LOC654088
SCRN3
LOC642312
LOC644477
MIR376A1
LOC650314
ALS2CL
COPZ2
LOC642506
LOC729501
LOC650061
LOC643081
LOC643130
LOC647919
MIRH1
FBF1
LOC730357
LOC647447
LOC646383
LOC647841
LOC646449
HS.575024
LOC400509
LOC727732
SLC7A14
FLJ33544
LOC653539
LOC652680
LOC732419
LOC653353
HS.552045
LOC653507
FLJ16331
LOC653244
ANO9
LOC399753
SUZ12P
WDR31
TNFRSF4
LOC728832
LOC646332
PRAC
DEFB125
MIR1537
OVOS
PSMB9
HS.572013
HS.542732
HS.553231
HS.48706
SNORA37
LOC651044
LOC401398
LOC646396
LOC401589
LOC729313
AMMECR1
HS.567477
HBS1L
LOC728779
RAE1
LOC650058
HSF5
LOC647131
ABL2
LOC100129066
LOC100131705
MGC34821
MIR556
LOC648154
CTSE
LOC100132820
HS.560343
KRTAP10-3
LOC728207
HS.169815
SCARNA15
LOC646484
C20ORF133
C16ORF90
LOC100129448
HS.563969
FOXD4L4
FLJ43950
POGZ
LOC643879
LOC729198
MIR1284
LOC100134568
LOC100133586
LOC644838
LOC100130764
ADAMTS14
ZFP3
BDNF
RBM24
AMPD3
SULT1A2
SIGLEC14
AMBN
HS.144030
LOC730011
PCK1
LOC645441
LOC401915
LOC728379
EMX1
BBS5
LOC732275
LOC643608
LOC100130892
HAO2
INPP4B
LOC391165
EBI2
LOC643326
HAL
PARD6G
SLC16A2
HS.209165
HS.544785
MGC40069
LOC650120
GPR82
LOC100131460
C10ORF41
HS.540632
SPINK2
C2ORF19
LOC100130127
PCDH15
CDC42
CDGAP
MIR1912
LOC648700
SFTA3
LOC653424
CMYA5
TXNIP
ABCG1
MYOT
HS.579409
LOC729595
SELPLG
CCS
SCG2
LOC388938
LOC441212
APOBEC2
LOC100128372
KLF10
LOC651249
SLC28A1
LOC642347
DDIT4
LOC650428
KCNH1
LOC100133887
LOC390251
LOC389111
HS.554203
HPN
LOC100131997
LOC439951
LOC646951
LOC729314
DNAH14
SNORD76
AKAP12
C20ORF186
LOC649379
LOC653748
LOC100130692
LOC100132857
LOC731797
PGA3
MIR1246
LOC643717
HS.125983
LOC652379
LOC652217
TMEM50B
CCRL1
LOC100133234
LOC649443
TRIM9
LOC100129657
PDE4DIP
COL11A2
TERF1
LOC650708
LOC441007
LOC642132
MIR639
NFIC
SNF8
C1ORF175
LOC100131265
LOC285943
HS.544557
LOC643373
FBP2
LOC729799
LOC100132494
LOC338799
LOC389036
TTTY3B
BRAP
HS.563827
LOC728253
LOC100133975
PEMT
LRRC4B
LOC648855
LOC647647
TNFSF13B
HS.582338
ADAMTS15
HS.208715
LOC645208
ERVK6
HTR2A
LOC652665
LOC116412
LOC440993
ASNS
HS.545893
LOC729534
LOC647778
LOC653652
LOC644695
COX11P
LOC650867
OR2AT4
PDE5A
KCNK18
GUCY2D
LOC391766
HSD3B1
SPRR2E
HYDIN
HS.561633
GCSH
PDZRN3
EPHA3
HS.581769
CCDC57
TBC1D3B
ZNF165
TCTEX1D4
ZNF750
HS.577816
PCDH11X
LOC643825
LOC401589
LAIR2
SLC26A10
TMEM35
LOC100134081
HS.582014
CPAMD8
KIAA1632
HS.571403
HS.566306
AMN
LOC400707
LOC654220
LOC100128336
LILRB3
LOC645968
LOC644365
NBEA
ABCA7
RAB14
DENND4A
LOC644519
SNORD109B
HS.541834
LOC644973
TMPRSS11A
LOC643910
HS.542265
FLJ32252
C1ORF84
PRDM16
LOC652553
LOC286239
HS.121070
LOC643684
LOC727821
LOC642032
EFCAB1
LOC100132779
RNF113B
FLJ27255
PHOSPHO1
LOC100131850
LOC401072
ATP13A3
LOC220998
ZNF100
MMP23A
JMJD2B
HS.191602
SDR9C7
C9ORF84
FYB
PKIG
HS.566309
LOC647543
HS.541596
LMAN1L
LOC100129427
LOC728467
HS.542629
CBWD1
HS.534809
KIR3DL2
LOC653397
C3ORF27
HS.123474
SNX14
LOC653464
SERHL
OVOL1
CNDP1
MLLT10
LPPR3
LOC652252
MARCH11
LOC100128326
C1ORF61
FAM55B
HPCAL1
LOC642113
USP41
TCN2
LOC728939
GRHL3
LOC646283
LOC642553
HS.148448
HS.543725
NUDT21
SNORD36B
NSL1
C6ORF107
MYOM2
TRPM8
LOC389888
CMTM3
ASAH2
HDHD2
LOC23117
KIAA0125
HS.540824
TRO
LOC441722
SYT9
FBXW11
LOC729153
MARCH1
SHISA3
LOC652435
HS.583591
LOC650087
MIR223
IL1F8
HS.406790
ATP2C2
LOC100133479
MBD3L2
C19ORF64
LOC283683
FSD2
KIAA1751
LOC652234
LOC642767
VSTM2A
HS.121392
LOC100131644
LOC390594
LOC647108
MUC6
GRAP
HS.453381
LOC100133286
LOC641977
HS.153349
LOC100132024
ILKAP
APOA5
OPN1LW
UBE2A
MT1H
OR4K15
HS.537594
HS.537991
APOA4
LOC645724
C1ORF84
LOC399715
UGT1A1
CAMK2B
FLJ40453
SEPT1
OR5AU1
LOC100134672
RNU1F1
ASAH1
LOC647080
HS.570581
LOC648354
CTHRC1
C8A
ZNF806
NDUFB1
LOC646604
ATAD5
HS.7023
AGRP
LOC388621
HS.377660
HS.133324
FAM90A6P
LOC650251
HS.22928
LOC653601
MFAP3L
ARGFXP2
C17ORF41
C12ORF53
LOC729724
GPR97
HS.523705
FOLR1
LOC652065
LOC642305
LOC653886
ITGB5
SPINLW1
LOC729222
CSTA
HS.60556
ATP2B2
MGAT2
HS.369643
MIR642
SYT7
VPS24
LOC650433
MIR377
CDH15
REPS2
ADCY2
PAK7
LOC644421
MASP2
RMST
TSGA10IP
ADAM22
LOC728637
LOC643203
CXCL12
LOC388401
LOC649296
LOC644785
LOC100129174
XYLT1
HS.573575
LOC643669
IRF4
CETN3
LOC285033
LOC643060
TMEM190
CNOT6L
LOC643807
HS.444092
LOC100134517
SPERT
SPN
LOC646132
LOC643648
KC6
LOC131909
KCNIP4
HS.381884
TMEM38B
BIRC7
CD300LG
COL5A3
LOC643927
BCL2L10
GOT1L1
LOC91948
C13ORF30
CXORF48
LOC732134
MCOLN3
LOC642441
HS.547715
LAT
LOC642447
GDA
SACS
LOC644466
LOC642595
FLJ10088
HLA-DRB1
LOC648704
LDHAL6B
LYNX1
LOC730974
LOC100130562
LOC643844
SUGT1P
FLJ25715
LOC645196
LOC649103
LOC728760
C4ORF39
RTN1
SMC5
CNGA3
LOC650950
LOC647541
LOC645941
LOC401180
CCR2
LOC339674
C1ORF117
LOC643274
ZNF807
SCN2A
HS.569304
PPT2
LOC284260
LOC732393
LOC100131904
LHX9
C1ORF125
C6ORF35
HS.147198
HS.544245
LOC729681
SAPS2
LOC100134276
HINT3
LOC645446
HS.547239
LOC401442
FLJ27354
MIR1272
KLHDC1
LOC441601
LOC645649
TPSAB1
LOC652777
LOC729197
SNORD90
SCN8A
LOC392440
LOC647347
LOC285634
FERMT3
HS.518426
PAX7
LOC649075
FAM160B1
LOC645686
IL18BP
LOC643566
NBPF1
LOC641999
LOC646019
LOC653663
TPPP
LOC652396
NTN5
LOC727858
CYP3A7
HTR4
DNAJC21
ICAM4
HIF3A
LOC100128265
TEAD4
HS.575737
ZNF578
LOC729510
PEX5L
LOC649858
FUT11
HS.569956
LOC401934
DMBT1
CMTM4
HS.445843
SEC1
HS.143732
SMA5
ALOX15B
MIR548H3
FNDC5
FSD1
LOC391013
C22ORF23
LOC727977
LY6G6F
C20ORF118
ATP2A1
HS.146614
CXORF58
OR52E6
KIAA1641
HS.575310
LOC731895
KRTAP2-1
SNHG8
HS.445581
C4ORF19
LOC651116
LOC653073
ZNF321
DCAF12L2
MGC39821
HS.352677
LOC255130
TMEM191A
TMEM174
KLK4
OR2T2
ZBTB16
LOC283867
LOC729882
HS.333693
LOC650167
LOC652383
HS.561130
BRUNOL4
LOC643435
LOC100133714
HS.543956
HIPK1
HS.571024
BRWD1
DGKI
LOC731082
RHBG
LOC143941
LOC644748
HS.126651
LOC654046
LOC100130776
KCNG2
OR2AK2
LOC100134269
HS.560503
OR7E91P
LOC283710
LOC642666
FAM71A
FLJ40296
LOC642969
LOC643509
FICD
LOC653806
C1ORF173
HS.528873
LDHD
LOC286411
LOC728927
LOC650850
RBMY1A1
HS.514958
CXORF67
LOC644038
LOC100131316
KRTAP21-1
DKK3
HS.583888
LOC652529
LOC644010
LOC650796
LOC100134587
ARMCX6
LOC642187
SNORA72
LOC642950
LOC100129278
LOC645662
CDH26
LOC100129686
LOC642656
P2RX3
KIAA1843
LOC648403
FLJ20397
LOC595101
LOC653877
NGFR
LOC645198
OR10A6
FSIP2
C19ORF69
LOC727804
LOC285735
LOC643814
LOC100128435
LOC650339
KDM5A
NEK3
KIR3DL3
PCDHA9
HS.278265
FRMD4B
NCRNA00159
LOC100132055
FBXO47
LOC647444
LIPL4
ICAM1
LOC727927
LOXL1
LOC338797
HS.537363
LOC100128392
LOC644436
HS.446301
MIR199A1
GPR156
PPHLN1
HS.575075
ADH1A
LOC130773
HEATR7B2
TAC1
MIR1266
WDFY4
MT1E
HOM-TES-103
HS.534945
LOC347475
GREB1
TNFRSF18
LOC389607
LOC100127888
HS.564574
NPHP1
TSPY3
LOC642622
CSF3
LOC642097
EPHA6
HTR3A
HS.22689
LOC728056
SNCB
HS.565001
HS.565461
LOC729957
TTTY13
HS.543617
C10ORF95
LOC645836
LOC100131368
CNTN5
HS.545602
LOC646533
PCP4L1
HS.254602
LOC150786
RFX4
FLT4
ARHGAP8
LRRN2
LOC728903
LOC100131426
LOC648851
LOC729433
LOC650261
LATS1
C10ORF131
LOC388796
ERCC-00046
LOC650147
LOC100132752
LOC643672
ADAMTS20
OR3A1
LOC647247
NEBL
HS.390856
FLJ35740
LOC727880
NLRP10
HS.436307
ZNF555
NEUROD6
HS.76704
LOC100129638
HSP90AB4P
C8ORF4
FXYD7
LOC401650
ARHGAP26
COL28
LOC643441
CYSLTR1
BEXL1
LOC731511
NDST3
LOC642005
DKFZP686E2433
BAPX1
BPI
PRH2
AHCTF1
HS.106234
FBXO4
HS.209202
FGF22
HS.561885
LGALS2
WBSCR23
LOC100131688
PCBD2
SYNE1
LOC152118
CXORF30
LOC338579
LOC400927
LOC643993
HS.547175
LTB
LOC647797
HS.554298
HS.538000
UBTD2
LOC645126
LOC650716
DKFZP547K054
KRTAP2-2
LOC131055
LOC648173
CKMT2
LOC646764
NAIP
LOC139363
ADM
BTNL3
GALC
LOC728971
NBPF9
HS.436592
LOC730964
BLOC1S1
HS.564111
OR10A7
LOC731999
CD55
RBMXL2
HS.580000
MIR92A2
ZNF765
MIR545
TIMD4
LOC100132119
HS.553278
ACCSL
LOC729722
HS.540598
LOC646278
LOC645254
LOC643231
MIR942
TTTY21
LOC645487
KRT39
RPS6KA6
NPAS3
IMAA
LOC728095
BIN3
LOC727762
HS.553019
AZU1
LOC730034
LOC643960
LOC644976
LOC100134474
LOC100132329
MGC42105
LOC652674
MIR579
SEMA5B
LOC729616
LOC100128322
FAM75A2
MCCD1
HS.580330
STRA6
ELAC1
ACBD7
LOC648223
AADACL2
KCNK16
LOC100133063
LOC440131
ADCYAP1R1
ZNF527
CHKA
HS.172749
MCTP1
LOC390748
LOC643805
HS.442098
LOC100133313
RIMBP3B
KCNQ1
LOC389786
FAM47B
LOC643171
LOC643331
LOC100128908
HS.538498
FLJ40113
LOC344887
MIR328
PSPHL
LOC440225
LOC340113
ZNF829
LOC642362
LOC644403
LOC647346
KRT18P26
ZNF778
LOC100133598
ZNF479
FLJ43276
HS.127874
EGOT
LOC650074
CFP
NR4A3
OR10C1
HS.443534
KLK5
LOC646079
HS.577545
HS.555208
LOC100129417
LOC642780
HS.561604
LOC100129083
LOC644093
TAF9B
LOC389842
HS.130048
GKN2
TGM7
EIF1AY
LOC727922
HTN3
ZFY
HS.537682
LOC647960
HS.443436
HS.550095
LOC650390
CLCN3
MYT1
C11ORF70
LOC619207
LOC100134444
ANTXRL
LOC100130357
SOX30
LOC100128901
SMAD1
LOC646879
HS.240801
LOC100129095
VCL
LOC646585
IPF1
CLCA1
LOC651285
HS.542667
PPP1R3B
WIF1
LOC442153
GALNT9
KRTAP5-1
LOC642646
DYDC1
HS.565086
HS.567192
TMCC1
HS.563599
LOC645029
LOC729238
LOC100130356
LOC730105
PRSS7
KRT18
HS.116134
IL17RE
ADAM33
ARGFXP2
HS.134166
LOC100133994
SEC14L2
LOC100132979
LRRC8B
HS.494932
ANKRD20A1
HS.54940
SPP1
HS.565734
CDH6
PAIP2
TRIM75
HS.545199
LOC131691
SYT14L
HS.574683
RP9P
EPS8L2
LOC390084
LOC100129619
LOC100133827
DLK2
PAH
HS.563292
LOC649466
HS.203201
LOC644880
LUZP6
LOC728591
PPP2R2C
RASAL2
SNORD116-2
HS.544737
LOC100131480
HS.568964
CHI3L1
HS.28367
SNORD44
HS.539591
HS.129261
LOC653380
DPRXP4
ERCC-00071
ATG4B
LOC100129103
PTCRA
TREML3
LOC653899
COQ6
LOC729264
PPP2R3B
C2CD4D
LOC100130184
LOC100131431
C1ORF210
LOC653853
LOC441870
LOC642250
LOC731852
LOC400236
OR10G9
NHEDC1
LOC389730
HS.130344
HS.537679
C6ORF224
HS.577758
GPR34
LOC729212
LOC643697
HS.576804
CGB5
LOC730379
LOC100131431
LOC100131192
C12ORF55
HS.581662
C11ORF44
FUT9
LOC390829
LOC654023
LOC730262
LOC100128386
LOC144742
LOC653086
CSPG4LYP1
LOC728553
ACE
MIR7-2
FAM13C1
C12ORF33
CCK
DUSP26
TMIGD1
CDKL2
LOC388248
LOC651029
FLJ40125
LOC652344
TRIM60
WDR74
HS.293676
HS.578161
PCDHA1
HS.208405
ADAM12
ATP2B1
SIGLEC1
LOC730376
LOC653349
MIR381
LOC255809
FLJ35379
SRGAP2
LOC653539
DDO
HS.134521
TNFRSF9
LOC202459
GRIP2
LOC651845
KLK15
LOC650040
LOC123688
AQP7P2
GPR183
ZNF233
LOC642987
PLG
PCDH8
PRAM1
BVES
C14ORF166B
MAGEC3
HS.448059
HS.184721
LOC647480
GTPBP10
LOC643062
MGA
SYTL2
MAZ
HS.532001
GADD45B
HS.543659
CELA3B
TGM4
PHACTR3
LOC100128889
HS.552263
OTUD4
LOC642650
NLF2
OR1S2
LOC649700
ABHD2
LOC731275
LOC649143
GALK2
CMTM5
LOC643186
LOC649800
CDY1B
SDR42E1
LOC100129856
KCNH2
SMN1
MIR1-1
TMEM176A
GADD45A
HS.421200
SPO11
TRO
HS.120893
SLC26A5
LOC642693
SH3BGRL
SOX5
HS.538762
MAP6
FLRT2
LOC653600
PPP1R2P3
HS.540000
HS.543144
ABCB11
DEFB123
DTX2
FUZ
SLCO1C1
C15ORF44
LOC729684
RASSF2
FAM55D
HS.504036
SNORA66
LOC440820
ZNF667
LOC643652
LOC645711
HS.566876
AIFM3
LOC650862
HS.128848
RGS1
LOC653423
GRP
LOC648257
RASA4P
LOC100129218
HS.582536
OR2T34
LOC284100
LOC647499
ST5
LOC651760
LOC441869
OR2G3
LOC728627
OR8H1
NPY1R
PFN2
UBE2W
ABCC6
PPP2R1B
LOC100131573
MLNR
ALOX12
LOC643982
LRRC48
HS.573723
LOC100129002
LOC644679
HS.570291
LOC643171
LOC651589
DKFZP686D0972
SMEK3P
CLEC3B
FLJ40434
SAPS2
EDA
NEUROD2
GPR116
OSM
FGFR2
TMEM195
C18ORF20
CD300A
LOC729732
CDC25B
WDR90
MYH4
CACNA1G
HS.571831
ZNF423
EDAR
LOC644899
LOC284821
LOC647854
PPP3R2
CYP2D7P1
POLR2J4
HS.537754
LOC100128074
LOC646906
LOC653184
LPPR5
NNT
ALOX5
HS.258083
LOC730908
LOC647274
TNKS
LOC100132956
HS.128032
LOC731052
LOC651520
LOC100132439
HS.132283
OR52K2
AKR1C2
LOC645416
LOC727833
C9ORF85
TRIM31
LOC644057
LST1
LOC646198
LOC651723
MAML1
HS.583362
LOC729390
GRK4
CADPS
ZNF688
HS.127857
LOC648226
LOC100133766
CBFA2T3
HS.561929
LOC644921
LOC100133539
GMPPB
LOC391142
GNLY
HS.370423
HS.543412
PADI1
LOC647447
C10ORF91
LOC647310
LRRC39
HS.134634
SMR3B
C20ORF70
SLC30A2
LOC651704
LOC653543
LIG4
ADAM19
TAKR
HS.545544
OR52N5
KLRK1
ZNF681
LOC100132797
LOC257039
CLSTN2
LOC645232
LOC649429
LOC728763
LOC100130990
XAGE1D
SSX4
ODF1
ANO1
PHF20L1
LOC644537
LOC648761
CT47A7
ERCC-00131
KRT33A
ZNF114
LOC440456
LOC390364
LOC100129243
HS.170946
PAGE5
HS.580053
HS.580714
HS.491292
IL29
VAX1
ARL5C
LOC729335
ARHGAP22
HS.352549
ADAMTS16
LOC390332
HS.548146
DHX40
HS.566661
LOC645217
LOC645291
CAST
APOBEC3D
NR1I2
HS.529633
TEKT5
FAIM
HS.539292
PAK6
XKR5
LOC100131165
LOC643955
SDHALP1
HS.570176
CXCL5
LOC653352
APOL3
RGSL2
LOC100131836
LOC440233
LOC100132088
NFYB
HS.485841
OR13A1
ESPNL
KRTAP1-3
OPN1SW
SH2D1B
GDAP1L1
RPL32P3
ZNF541
LOC202181
LOC646936
LOC100129905
MIR139
TANK
C20ORF26
WISP3
LOC645655
PCDHA13
GCNT1
FAM155B
IL1F8
FKBP9L
ZNF780B
ZNF492
HS.565338
LOC728692
CHST8
LOC653219
LOC100132025
LOC648473
FUSSEL18
HMGB4
MIR217
LOC285634
ATP2A1
ORAI2
HS.581938
SIGLEC7
VENTXP7
LOC649186
GAK
LOC653338
SCN1B
LOC653515
SOX11
UBE2E3
LOC375295
LOC642003
LOC647862
LOC441119
CD200R1L
ARS2
SPINT1
SEC24B
LOC649800
LOC650013
GADD45A
HS.150734
SEPN1
LOC653801
HS.536336
OMD
LOC645188
KIAA0514
PLA2R1
FBXL21
HS.496187
HS.543981
HS.557620
LOC100134409
KLK14
LOC652682
LOC649057
HS.541506
LRRK2
TCIRG1
FLJ39632
LOC100130520
PTP4A3
FLJ46361
LOC158318
LOC619207
LOC645964
LOC729828
MIR449B
B3GNT7
ZNF550
LOC643621
RNU5A
HS.482589
HS.546710
LOC100128139
LOC646943
FLT4
LOC646615
LOC729266
PLGLA
LOC440349
LOC651562
KCNAB1
LOC390387
LOC648174
CRYBA1
ABCG1
LOC147650
KRTAP4-12
LOC649023
ATP8B2
C4ORF10
LOC647546
LOC442668
PGR
LSP1
FAM22A
TRIM55
HS.386275
LOC388237
ANGPTL3
LOC100134722
LOC650003
CYCSL1
LOC643246
LOC100129751
KLHL32
TXNDC5
KIAA1383
HS.337087
LOC100134793
MIR943
KRTAP19-1
KRTAP12-1
KIR2DS5
DDX12
FOXA3
HS.544047
PRLR
GAB2
C1ORF107
LOC200420
HS.582971
VGLL2
FAM65B
OFCC1
IGFALS
ZNF93
LOC644602
HS.537608
NFATC2IP
FAM23A
LOC643263
TMEM79
FLJ39739
OR4F4
LPPR4
LOC100133770
LOC643961
HERC2P2
C15ORF53
COL6A6
LOC651128
LOC439992
LOC100130133
XCL1
LOC645458
LOC652762
LOC652460
CEACAM3
LOC100129643
ERMAP
TFAP2E
HS.582211
CACNA1E
HS.348477
MIR92B
DC36
OR2M5
CACHD1
LOC649174
LRRC37B
LOC643009
LOC652612
LOC644278
ATXN7
NBPF10
LOC652552
SH3BP5
WHDC1L1
LHFPL3
LOC647649
DUOXA2
LOC100128519
IRF5
HRG
ZNF345
FLJ36701
FLJ46836
LCORL
LOC643210
LOC643938
HS.282556
MDK
LOC645040
HAO1
PPP1R3A
HS.559602
OR8J1
LOC643599
AGBL1
PARD6B
HS.374311
LOC100132652
HS.539941
LOC100130084
GYPE
HS.582845
HS.512276
LOC644846
LOC339240
SNORD107
NFS1
HS.540678
MIR519B
MS4A1
PTX3
LOC253482
AADAT
RPAP3
HS.537730
KRT18P30
GCOM1
LOC100131864
CISD3
LOC730259
LOC644413
GPR135
C10ORF4
SNORD114-11
LOC650488
HS.210969
FLJ33360
MIR509-3
LOC647166
HS.541590
LILRA6
HS.545246
LOC100128498
MIR640
LOC651324
HS.556708
HS.545094
OR2L2
TRPV5
MED12L
LOC645974
CDY1
DCX
HNRNPCL1
RAMP3
LOC100132296
LOC653968
CAPN11
LOC100129720
FAM7A3
LOC651617
GPM6B
AMIGO1
PRO1853
LOC644753
PLAG1
HS.539194
MSMP
HS.542112
LOC732343
HS.512285
LOC644482
KSR2
NLRP11
PCDHGA9
LOC442434
LOC391859
VAT1L
HOMER2
EDARADD
COX8C
LOC402508
LOC650146
IL10RA
EMR4
CCDC61
HS.559454
PRAMEF5
LOC642637
FDXR
TMTC2
UGT2B4
LOC728208
MYO1H
DENND1C
CHIA
LOC100128572
DKFZP781G0119
OR2A5
C14ORF159
LOC644100
LOC648253
HS.527669
HFE
CCDC13
LOC283755
LOC729655
LOC651430
ANKRD47
PCGF3
COX6B2
[truncated: 30,063 more rows]
