# Supplementary material for: Association of SNPs in the PAI1 Gene with Disease Recurrence and Clinical Outcome in Bladder Cancer
Source: Int J Mol Sci. 2023 Mar 3;24(5):4943. doi: 10.3390/ijms24054943 (PMC10003630; doi:10.3390/ijms24054943)
Supplement: Supplementary file 1 [file ijms-24-04943-s001.zip › Supplemental Table 7.xlsx]

## Sheet: 5637_UROtsa_DEGs_Venn
Table S7. The gene list of Venn Diagram for DEGs C125E01 vs WT between 5637 and UROtsa.
Names	total	elements
5637 UROtsa	509	FAM153A
		ITGA5
		GFOD2
		GGT3P
		LOC100134266
		LOC729926
		DHRS11
		DIP2A
		C5AR1
		EED
		LOC100133233
		FAM73A
		MIR1228
		CCNE1
		TIAL1
		RPS28
		LRAP
		LOC100129362
		ALAD
		ASS1
		POLG
		P704P
		FERMT3
		DAPP1
		GNG12
		GCA
		XPC
		PSG4
		LOC729964
		CHMP7
		PTPN2
		IL18BP
		FHL1
		TTTY14
		LMO4
		OPA3
		RNF182
		ZNRD1
		OAS1
		TRIM45
		PAWR
		LOC643949
		KLHL28
		LOC645387
		RAB20
		LOC642784
		LOC100132394
		IMPAD1
		OPN3
		TAOK2
		PPFIBP1
		FAM129B
		SAFB2
		IL18
		LOC729852
		WSB1
		SOCS4
		LOC653145
		C2orf69
		KCTD2
		DTWD2
		TRAPPC6A
		LOC148430
		FBXO7
		HMGXB4
		TRIM16
		C15orf44
		ELK4
		PES1
		LOC729679
		PTCD2
		ANXA2
		PHAX
		LOC100134364
		OGFRL1
		CITED2
		LOC649679
		ABHD5
		LMNB1
		SPAG5
		ELFN2
		PFKFB2
		LOC100128410
		CLIC4
		PAX6
		TAP2
		ZFP36L1
		WDR74
		LOC728285
		CREB1
		MXRA7
		CLDN14
		ZNRF3
		OAS2
		VCX3A
		TMEM167A
		THBS1
		RBBP7
		TXNRD1
		GSTTP2
		SLC3A2
		HRH1
		CHEK2
		C16orf57
		RPL9
		TARDBP
		ID2
		FLJ20397
		LOC644949
		SLC15A3
		HEY1
		C21orf33
		GAS1
		NT5C3
		NLRP8
		CRIP1
		NCK1
		DMD
		MLKL
		CCBE1
		BLZF1
		CSAG3A
		LOC100131836
		IGFBP3
		SNORA67
		BNC2
		BCYRN1
		ROR1
		LOC100130516
		MAP2K3
		MAP7D1
		AOX1
		C1orf86
		LOC401098
		C5orf41
		KIAA1751
		TGFB2
		SLC25A37
		USF2
		TPD52L2
		MYO3B
		CRYZL1
		LOC728323
		MSL3
		ABCG1
		AQP7P2
		NEDD4
		LOC653489
		PRKAR2A
		SLC25A1
		MRPL33
		HSPBAP1
		CSTF3
		ALDH4A1
		CRYAB
		C21orf88
		CCNI2
		C8orf48
		SLCO3A1
		CDK2AP2
		LOC729500
		LOC100134868
		ECE2
		LOC100130550
		LOC644852
		C14orf138
		DLG3
		ZFP36L2
		SV2B
		PRPF4B
		C1orf88
		PMS2CL
		GARNL4
		FRMD6
		BOLA2
		HSPA6
		ATN1
		MPZL1
		LOC100130905
		GPRC5A
		LOC402112
		LOC648210
		CCBL2
		C7orf65
		IL17RB
		GSTT2
		CSE1L
		SNHG7
		LOC100129095
		ACSL5
		C1orf87
		C4orf33
		SLC4A7
		HIAT1
		KERA
		RFC4
		SNORD34
		LOC729978
		NUP50
		C1orf113
		IL6
		CTGF
		LOC652330
		BCAS4
		ITGB3BP
		RGS2
		IVNS1ABP
		PGAM5
		C6orf204
		SMC2
		C19orf66
		DEDD
		FAM86A
		IFI6
		WBP5
		LOC400743
		FOXO4
		TAF13
		DSCAM
		AIFM2
		DIP2B
		PIGA
		NME7
		LOC646254
		LHX3
		GINS4
		CD79A
		NBPF10
		MBNL1
		FOS
		LEMD1
		COG5
		SNRPN
		MSI2
		LRRC40
		ASNS
		HIF1A
		LARP1B
		SLC25A19
		NFATC2IP
		PRDX2
		LOC440487
		IL7R
		FBXO4
		CD1E
		LOC731231
		NFX1
		LOC645726
		PPP2R2B
		LOC100128062
		UGP2
		UBE2V2
		FLJ22184
		LOC151760
		JUN
		KIAA1026
		PNN
		GAD1
		FGD6
		DAAM1
		MBOAT2
		USP1
		TMEM137
		BIRC3
		RMRP
		GDF15
		HOXD11
		LOC646836
		RIOK1
		ITM2B
		LOC100133607
		ACSL3
		SPIRE2
		LOC646786
		MTRR
		BBS7
		TPI1
		PDE6C
		SIPA1
		SERPING1
		TNFRSF10A
		SLC7A3
		POGZ
		PHLDA1
		PSMC3IP
		ZNF549
		LACTB2
		ALPP
		GAA
		C9orf103
		C10orf59
		SPRR2F
		MLL3
		CTSB
		SVEP1
		SIRT2
		DIXDC1
		HIATL2
		TUBA1A
		MAP7
		SPAG9
		ANTXR1
		WNT5A
		REPS2
		FCAR
		PRKDC
		C7orf28A
		LOC100133516
		NUDCD2
		RBM3
		ACOT9
		NFATC3
		LRIG1
		LOC646034
		TPD52L1
		LOC100128505
		PLOD2
		LOC100132564
		PI3
		ZFAND6
		SMG1
		CD68
		PRDM1
		LOC100132795
		EFEMP1
		ZFX
		LOC100128440
		IL19
		GFPT1
		IP6K2
		LOC729298
		LOC390557
		LOC100131205
		ANGPTL4
		CTNNBIP1
		KIAA1644
		GADD45A
		ZNF430
		TMEM166
		C8orf46
		YRDC
		PTPRF
		THOC4
		MUC6
		LOC100128084
		CICE
		PLA2G2D
		SAMD11
		CCPG1
		LOC643161
		HSPE1
		LOC729439
		RNF160
		FAM40B
		HIST1H2BK
		RGNEF
		LOC100008589
		LOC100132767
		GLS
		LOC100128288
		LAMB2
		LOC100128266
		DYNC2LI1
		AGAP3
		2022-03-04
		BNIP3L
		ZC3H5
		IMPDH1
		GFRA1
		LOC100132585
		HIST1H2BD
		RPS6P1
		LOC641978
		C9orf169
		LOC389517
		RIMS4
		DKFZp761E198
		SCMH1
		GNA12
		IFITM1
		KIAA0101
		ASB9
		CTTNBP2NL
		EPHB2
		MCM8
		LACTB
		RPS9
		INSIG1
		HSPA12A
		FAM176A
		LOC653879
		LOC441009
		LETMD1
		PVR
		IFIT3
		TMPRSS11B
		CCDC25
		LOC100132727
		MATK
		C1R
		SETD2
		TIA1
		HMG20B
		DNAJB1
		RFC3
		LOC644029
		2022-09-05
		PTPN11
		HCG2P7
		SLC16A12
		ATP1B1
		SEMA3E
		PPAP2A
		FAM86B1
		FKBP14
		TSC22D3
		LOC650832
		LOC100132593
		LOC402644
		DLX4
		SCAND1
		VAPA
		MAP2K6
		BNIP3
		KIAA1407
		LIMA1
		LOC644019
		CCR2
		PDE8A
		C21orf57
		SDC4
		WARS
		PPP2CB
		DDX60
		LOC728557
		LOC100129267
		PSENEN
		TPM1
		CTH
		ATF5
		TXNDC5
		TRIM9
		EPC1
		OCIAD1
		COX19
		TES
		C12orf57
		HYDIN
		GUSBL1
		STAG3L3
		ADPRHL1
		KRT81
		SLC7A8
		FLJ36144
		TAGLN
		ZNF394
		RMI1
		DAB2
		TUBB2A
		SERPINH1
		LONRF3
		LOC728253
		LAMB1
		RN5S9
		TRIM13
		ANKRD30B
		DDIT3
		FAM46A
		GNPTAB
		MSX1
		FNDC3A
		DLX3
		UBE2E1
		TTYH2
		ELF2
		BANP
		CYP51A1
		DST
		LOC100132060
		WTAP
		TMEM17
		RNF214
		CLYBL
		TSPAN1
		SERPINE1
		IFT81
		CTBP2
		NEDD9
		HNRNPA3
		PGAM4
		PDZK1
		CFB
		TJP2
		HSD17B8
		NNT
		MIR1978
		PLAC8
		NUP43
		CA1
		NPL
		CAST
		PGM3
		SNAI2
		DLEU1
		CCDC71
		FLNA
		C21orf58
		S100A13
		VHL
UROtsa	1835	LOC653712
		ERCC5
		C15orf27
		NHEDC1
		GLT1D1
		PFKP
		PRSSL1
		PTPRR
		CHD8
		EPB41L4B
		LOC100129553
		WISP2
		RDH10
		SIRPB2
		LOC643648
		ZNF446
		MIR582
		MSRB3
		KCNK6
		LYAR
		GSTCD
		LOC100133329
		NR4A2
		IGSF3
		POTED
		CMPK2
		ITGA3
		LOC729826
		GRPEL1
		RELT
		ANXA3
		LARP7
		COL1A1
		KIAA0090
		CA11
		LOC401357
		LOC728379
		SHROOM1
		LOC729327
		ANKRD56
		FOXE1
		CHRAC1
		ZNF257
		LOC650311
		WHSC1L1
		ROR2
		GRAMD2
		MAOA
		FRS2
		AMY1B
		ST8SIA4
		TUBB2C
		LOC392583
		PLEKHG4
		C5orf13
		LOC100130325
		SHBG
		FAM90A6P
		RARRES3
		SYT12
		TMEM156
		GMPPA
		SEC14L1
		ID1
		GKN1
		LOC649707
		C1QL1
		ATP11C
		LOC137107
		PTRF
		FBXO24
		POLR2J4
		C11orf72
		TMEM59
		CDC42BPA
		C6orf176
		ADAM23
		SPTBN1
		TMEM1
		LOC100128326
		GRIK2
		LOC100130102
		ZNF552
		PILRA
		LOC388279
		LRRC48
		NFIL3
		ECEL1
		MIR147
		LOC100133714
		MUTYH
		PSG3
		LOC731085
		C2orf34
		C6orf208
		LOC729021
		MIR563
		NBPF3
		PRR5
		STAT5A
		ADRA1A
		AHNAK
		LOC387825
		C21orf34
		C21orf51
		OR2W5
		CYorf14
		C16orf62
		REXO1L5P
		ARID5A
		LOC440356
		SPINK5
		SH2D2A
		FLJ41423
		KLF4
		TJP3
		OLFML2A
		CXCR7
		GALR2
		LOC644591
		CCT4
		LOC728831
		KCNK10
		MIR379
		ZDHHC11B
		SNORA74A
		ENTPD7
		C10orf75
		STS-1
		OMD
		LOC100128063
		ZSCAN12L1
		LOC100134099
		KLF2
		COQ10A
		LOC646438
		LOC730098
		FAM92A3
		DEFA1B
		C1orf49
		LOC153684
		DNAJB4
		NTN4
		MIR1909
		PCDHGA10
		SVOPL
		LOC390407
		CASP1
		LOC100134304
		LOC441150
		HBP1
		XPO4
		HAUS4
		CA9
		VAX1
		RPS29
		NF1
		HCFC1R1
		LOC648548
		AGER
		SNTA1
		TCFL5
		C11orf49
		FAM71A
		KCNV2
		RBMY2FP
		LOC644010
		NT5E
		CD83
		LOC642733
		OXA1L
		SLC16A2
		ACLY
		RRAGC
		OR11H12
		SPDYE1
		GCH1
		MCM5
		ALG9
		KIAA1024L
		CPA4
		PODXL
		CCT6B
		SNCA
		GPX2
		LOC100128327
		SLC48A1
		PRCD
		EPB41L3
		LOC652163
		XRCC1
		SDR39U1
		MAS1L
		PARVB
		ITGA2
		EEF2K
		LOC646424
		OR2A7
		TRMT2B
		LOC338586
		KRT34
		LOC643959
		LOC642933
		LOC644037
		RPAP1
		SLC23A3
		LOC643203
		AUH
		GSK3B
		LOC100133994
		ADAMTS17
		LOC100133408
		CLCNKB
		LOC732424
		LOC649987
		FLJ20920
		JCLN
		GTPBP2
		FLJ46361
		MMP24
		CR1
		C20orf112
		SERPINA2
		DAAM2
		LOC647229
		WFS1
		LOC653189
		SNORA16A
		KRTAP5-11
		DEPDC1
		LOC440731
		FAM83A
		ARHGDIB
		MCF2L
		STK24
		SYNPO2L
		EGR4
		SP7
		TMEM16D
		BRI3BP
		LOC652234
		SLC23A1
		BMF
		GRAMD1B
		LOC643345
		LOC645966
		FBXO34
		LOC728737
		F2RL2
		LOC643566
		ZDHHC1
		HTR4
		AXL
		CKMT1B
		LOC651404
		KRT80
		DNAH7
		FLJ43860
		XPO6
		SLC12A3
		ST7L
		IRAK2
		CBX4
		LOC401648
		TMEM182
		KIAA0513
		LOC100132386
		LOC729387
		GPR97
		LOC653110
		NFKBIL1
		LOC554207
		CHD7
		CEP63
		ACR
		LOC100128010
		ANKH
		BIRC6
		OLFM4
		EPC2
		C20orf85
		LOC646566
		NAGLU
		SERTAD4
		LOC642989
		TRIM4
		SERPINI1
		FMO3
		CXCL2
		EGFR
		GOLGA6B
		LOC651552
		FAM19A2
		SPINK5L3
		NCAM2
		MSRB2
		CYSLTR1
		TRAK2
		LOC641744
		DHX38
		PDP2
		ARMC9
		CNTN1
		TMEM181
		CCL3L1
		LOC653397
		NUDT19
		RPL28
		NOX3
		DEGS1
		TMEM50B
		KRT16
		FAIM
		MRC1L1
		LOC729513
		PDE5A
		FBLN2
		LOC100128105
		C1orf108
		NRG3
		BCKDHA
		LOC642062
		CKMT1A
		LOC653560
		SPINK4
		SRGAP1
		TNFRSF21
		TBX3
		XAGE1
		LOC100130880
		MGC24103
		USP33
		LOC730274
		MAP3K12
		LOC730031
		WDR44
		CRELD1
		LOC729373
		OIT3
		MCM4
		Gcom1
		C11orf92
		LOC649107
		CHST12
		CETP
		GPR56
		CACNB2
		RHOQ
		INHBE
		HBB
		ITGAX
		RHOJ
		LOC642144
		PRPH
		ODC1
		DDX17
		HIP1R
		PLEKHA2
		ENO3
		COL4A6
		TOMM70A
		FLJ13305
		SGSH
		GALT
		KIAA0888
		LOC645586
		LOC145845
		PCDHGA11
		MT1F
		LOC100128936
		LOC441442
		FAM124A
		ELOVL1
		MYL9
		PTGFRN
		PBXIP1
		NEUROD6
		FLJ27354
		LOC100131510
		RASA1
		CHADL
		SH3BP1
		FAT1
		LOC650427
		LOC100129726
		JMJD1A
		HELZ
		LOC729193
		ANXA2P1
		TMEM50A
		STAG3L2
		FAM178B
		LOC653980
		SLC22A12
		MIR1266
		LIPK
		KLC2
		FNDC3B
		BIRC1
		FLJ21986
		BOLA3
		SEMA3F
		TMEM135
		LOC387723
		MARCO
		AKR7L
		NOBOX
		UNC84B
		LOC643234
		SH3GL2
		ST3GAL5
		RPN2
		DHRS1
		GAK
		C10orf113
		C4BPA
		LOC399988
		LMO1
		DCN
		LOC654103
		SUCLG2
		LOC641738
		OR52E6
		AMPD2
		ACTN1
		LOC729770
		MYLK3
		MIR921
		C2orf88
		ODF3B
		SLC30A3
		LOC440015
		LOC650253
		STMN2
		POTEB
		CBY3
		FABP2
		MT2A
		LOC651131
		MAPK4
		FAM13B
		CALCOCO1
		RPL14
		FBXO2
		CYR61
		SERPINA5
		CRB1
		GEMIN5
		UBR4
		LTBP3
		LOC731658
		BAIAP2
		ARSJ
		KCNE4
		RNASE4
		GKN2
		LOC646183
		COL12A1
		SNORA11D
		RPP38
		YPEL2
		MIR219-2
		PGBD4
		DNASE2B
		GNB3
		MFSD3
		LOC727927
		LOC643402
		MAP4
		LPP
		MIR193B
		HIVEP1
		LOC100128274
		ANKRD34B
		ARV1
		MACF1
		LOC728343
		ADD3
		CSNK2A1P
		TRIO
		POLR1C
		FBXO16
		TM9SF1
		RNF170
		LOC100134182
		UNC5B
		IRF2BP2
		EPDR1
		ZFP106
		FAM75A1
		DDOST
		SUGT1P
		KCNIP3
		GPNMB
		URB1
		ACVRL1
		PDLIM7
		LOC255783
		HLA-H
		LCAP
		TIMP3
		LOC645391
		CD55
		UAP1L1
		TMSL3
		EML1
		LOC644644
		SMAD3
		LNPEP
		ANKRD10
		OR5AU1
		DCBLD2
		MIR635
		RBBP9
		ATP6V0B
		DPH3
		MURC
		KATNAL1
		PAQR6
		CMTM1
		CNKSR3
		HBEGF
		LOC645971
		LOC641931
		UGT2B15
		LOC401399
		DHRS7C
		SLC40A1
		MIR10A
		LOC100131332
		DUSP2
		KIF18B
		LOC646897
		LOC131055
		LOC730358
		FAM55A
		LOC100129002
		LETM1
		C1orf123
		MIRLET7C
		LOC100132475
		LOC100133430
		ETS2
		FGB
		NACC2
		ITGA1
		CCDC83
		MIR647
		FOLR1
		LOC647400
		BAG1
		TBXA2R
		PAN2
		DMPK
		CCRN4L
		LOC729815
		TMPRSS6
		TP53INP2
		MYO10
		AREGB
		LOC100130824
		LOC654335
		TSHZ2
		LOC648117
		SLC12A2
		CLDN7
		LOC728103
		PROKR1
		GPR12
		LOC644760
		LOC730032
		KLF6
		PAGE2B
		HUWE1
		PLAC2
		CCDC4
		ASAP3
		LYRM5
		ACCS
		SH3BGRL
		C9orf36
		ZNF826
		LOC728689
		LOC100133985
		LOC401433
		FLJ22662
		LEF1
		CTPS
		EYA1
		PITX2
		FABP3
		RNF113A
		TRIM78P
		ANXA6
		RNY1
		ADAMTS19
		DPM3
		TTC24
		GPR126
		C2CD4B
		MAP3K8
		NCCRP1
		STOM
		LOC653686
		GSN
		WWC1
		EFNA1
		PDGFB
		LOC389631
		HLA-DMB
		LZTS1
		LOC100128435
		ARHGEF3
		SCD
		SILV
		NT5DC4
		NLRP7
		TRIM26
		LOC645363
		ANKRD11
		MTE
		DDAH2
		EGFLAM
		CDC42EP2
		TGFBR1
		LOC100129195
		SFMBT2
		RRS1
		TMEM83
		TIE1
		PCID2
		TUB
		ARRB1
		HSPA1A
		DAPK2
		HOXA11AS
		BRP44
		WDR60
		TMEM75
		SNORD44
		LOC644899
		ADAMTSL2
		LOC100129027
		MYL1
		LOC340274
		CALY
		DENND5B
		SRGN
		OR5AN1
		SPANXB2
		ANG
		LYPLA2
		LOC340113
		MIR551A
		GCHFR
		C10orf27
		LOC647911
		CAMK2N1
		LOC285741
		LOC729966
		LOC100133447
		MGMT
		AIF1
		LASP1
		SLC28A1
		TNFRSF12A
		FOXD4L4
		OASL
		IFRD1
		SPINLW1
		SIGMAR1
		LOC284023
		AMIGO1
		TXNIP
		LOC100128242
		LOC728014
		TLR3
		FBXO44
		MIR758
		NSDHL
		H1F0
		ZCCHC14
		ZMYM3
		LOC645721
		KCNQ1DN
		SLC7A2
		CLK1
		VDR
		EML2
		MIR1913
		LOC100130825
		SH3RF2
		COL3A1
		SGPP2
		KRT14
		OPLAH
		TUBA4A
		FLJ38379
		SPACA5
		KRTAP12-1
		FLJ32252
		LANCL3
		TBL1X
		ZDHHC11
		EPHA3
		CRKRS
		MIXL1
		GADD45G
		IFITM3
		ZNF580
		LOC100133769
		LOC645364
		ALOX15B
		LOC647041
		LOC653316
		PLCG2
		TTR
		DDIT4
		CACNB4
		STX1A
		TMEM149
		USP6
		INPP4B
		ALLC
		SERPINE2
		MGC10701
		MGAT2
		OR13C8
		GRIK1
		CHTF8
		SFT2D3
		DGKI
		LOC729479
		SLC16A6
		LOC100131256
		LOC729435
		LOC648758
		PREB
		LOC730908
		MIR92A2
		NQO1
		LOC100131360
		DENND1B
		LOC100129866
		PIH1D2
		DAB2IP
		CYP2C18
		SDC1
		ORMDL2
		FGA
		IGFBP1
		LOC100132116
		LOC645638
		GDPD3
		PLAG1
		IQGAP1
		MYCBP2
		FLJ11235
		APH1A
		C3orf31
		CAMK2A
		LOC651429
		NKD2
		CLU
		PRODH
		EPHA6
		CA10
		ZDHHC5
		LRRC30
		SLC20A1
		LOC100130496
		FAR1
		KLRC3
		C8orf40
		SHROOM3
		CCL28
		PLEKHG6
		SLC25A6
		DCP2
		CCT6P1
		C6orf10
		EXD3
		SGMS2
		UBE4B
		SDHAP3
		GABRR1
		IKBKE
		RASD1
		C12orf51
		LOC791120
		C21orf91
		PANX2
		LOC643634
		ANGPTL6
		LOC100127894
		GSTM3
		RTP4
		LOC339766
		LOC284297
		LOC644710
		ST14
		OR2G3
		TMEM201
		LOC341230
		BPHL
		C2CD2
		ERCC6
		NRIP3
		DGCR6
		ACBD4
		ZSWIM5
		SYNPR
		LOC100128943
		PCDH9
		LOC649191
		SLC30A5
		SPATA21
		LOC644335
		C9orf24
		DOCK5
		OR5AR1
		ACVR1B
		LOC100134322
		DSEL
		DGCR6L
		MOBKL2C
		TMOD1
		TGFBR2
		HLA-DMA
		MSLN
		ZNF700
		MDN1
		LOC727821
		ARHGAP6
		NFKBIE
		CT45A1
		LOC100128337
		MYCBP
		PATE3
		LOC730058
		TEX13A
		RNF125
		LOC644813
		LOC647485
		PLEKHA4
		LYSMD1
		CRTAC1
		ZFHX3
		LOC643720
		GRM4
		MLXIPL
		HPS5
		GPR156
		ADAM21P
		UBR2
		LOC100132635
		YIPF5
		RASL11A
		LOC645006
		LOC645048
		LOC729660
		FBXL18
		KIAA0460
		TMEM2
		CFP
		F3
		ZNF37A
		LOC728467
		PRNPIP
		DRD1IP
		STX16
		KIF21B
		DLAT
		LOC645453
		SPAG4L
		LOC100130764
		C10orf54
		CYorf15A
		OR51B5
		ST7
		MAGED2
		ANKRD55
		ACOX2
		TM4SF19
		TESC
		PTH1R
		LOC441763
		LOC653512
		LOC643253
		GABRA3
		LOC642110
		HDC
		LOC649299
		FTSJ2
		LOC731751
		PDYN
		VAV3
		SELENBP1
		FOSL1
		NPC1
		GSTT1
		CXorf30
		POM121L4P
		ACSM2B
		SMEK2
		LOC731670
		C11orf54
		ALS2CR16
		TOB1
		PRKAG1
		LOC645336
		PATL1
		PRR3
		FBLN5
		CNOT6L
		HELQ
		ARNT2
		LOC731282
		KCNJ2
		LOC728919
		APOB48R
		MPL
		RNU4-2
		LOC100131093
		LOC100129376
		AMZ2
		TAS2R43
		MRPL10
		C1RL
		CCDC46
		PMS2L4
		B9D1
		LOC344423
		PAIP1
		LOC100133005
		TCF25
		TMCC3
		MIR548I4
		ARRDC2
		LOC441179
		LOC100129231
		BAK1
		CERK
		LOC100129417
		CLCNKA
		LOC650538
		PGCP
		PCSK1
		PCOLCE
		LOC100133598
		PCYT2
		LOC442474
		LOC728991
		C19orf64
		MGC13057
		UTRN
		HISPPD2A
		PALLD
		GPC5
		ENOX2
		WDR69
		LOC389842
		INTS6
		PDIA3
		MACROD1
		C14orf126
		LOC649858
		BIRC5
		C6orf108
		MIR624
		GOLGA3
		OR1D4
		CDKL3
		RIPK4
		FGF17
		LOC100131403
		LOC100132296
		LOC653464
		IL1F5
		MIR520H
		LOC650005
		EP400
		CTSL2
		CYorf15B
		KRT26
		USP7
		KRT17P3
		ENOSF1
		STARD13
		PCBP4
		NFKB2
		LOC646456
		LOC441548
		CDH10
		LOC100131820
		LOC100132139
		ABHD2
		ORAI3
		ERLIN2
		PPP1R9A
		PCK2
		LOC652753
		PEX11G
		LOC100134406
		ZZEF1
		NBPF8
		TAF10
		PRSS21
		DLGAP4
		APPBP2
		INO80D
		ACOT7
		LOC100008588
		ZNF728
		ZNF467
		DYNC1H1
		KRT37
		PTGES
		BBS1
		LOC645797
		CHI3L1
		SLC35A5
		CD99
		TBC1D3E
		TTLL11
		HSPA8
		LOC642938
		THEX1
		LOC727797
		APOBEC3B
		LOC143678
		ABCC11
		MYH1
		TLE2
		GTSF1L
		RHOBTB2
		LOC729898
		GPRC5C
		LOC648064
		LOC727858
		LOC730668
		LOC653539
		PHACTR1
		LOC100133080
		LOC285588
		PGM2L1
		ACSF2
		LOC654046
		MIR153-1
		C6orf62
		CSTA
		DISC1
		BMP6
		NUAK1
		LAMB3
		VIT
		CARD14
		LOC653609
		DEF8
		C17orf100
		IER3
		CEBPD
		ALDH6A1
		UMPS
		TNF
		RILPL1
		LOC100130884
		ASAP1
		PCBP3
		C1orf198
		ATP8B4
		LOC651772
		GALNT17
		YPEL5
		LOC440261
		BVES
		WBP1
		TTC12
		C1orf100
		LOC401525
		LOC647862
		AGXT2L1
		LOC729032
		LMAN2L
		DPP7
		SERTAD1
		HAND2
		MARVELD3
		LOC653492
		TAC3
		CORO1C
		LOC729346
		ZNF627
		TRPA1
		FOXR1
		LRP5
		ADAMTSL4
		BHLHB2
		NAV2
		ZNF362
		C6orf48
		FCGR3A
		OR51S1
		CCND1
		TRPM2
		LOC85389
		BMP2
		GCNT2
		KCNN3
		ZNF790
		ACE2
		CNFN
		LOC642140
		LOC650455
		DLEU2
		GRTP1
		GNG2
		RIMS1
		FLYWCH2
		BCL6
		FGFR4
		CRAT
		TINAGL1
		LOC100130828
		SLC6A16
		LOC100130914
		LOC641995
		PSEN2
		LOC642018
		LOC728499
		SAR1A
		LOC642622
		TMEM5
		TNFRSF8
		GLCE
		S100A16
		KLF9
		LOC653264
		DKFZp779B1634
		GYG2
		PARS2
		LOC732443
		CTSF
		LOC392871
		TSPAN14
		HIST2H2AC
		C7orf11
		LOC100128404
		ERGIC3
		FBXO30
		TNFSF13
		PTGER4
		GHDC
		FLJ20489
		LOC100129119
		TNRC6B
		RERE
		GLCCI1
		UCHL3
		FAM21A
		EI24
		LOC643621
		INSL6
		FAM111A
		LOC650463
		LOC730861
		LOC650014
		MCCC1
		LOC647138
		COL5A3
		C1S
		LOC100128139
		CD302
		SERPINB8
		DYRK3
		NUCKS1
		EBI3
		LOC646050
		BPNT1
		CNTLN
		SLC2A14
		SSBP3
		TLN2
		LOC131909
		FAAH2
		MRM1
		SAG
		ISLR
		TRIM34
		PYGB
		C21orf99
		LOC729887
		MYEOV
		RFPL3S
		FLJ41856
		ODZ1
		LOC727732
		B4GALNT3
		FSCN1
		LOC641805
		MIR648
		LOC100130217
		AQP3
		LOC645737
		VPS37A
		LOC654230
		PRG2
		HLA-A29.1
		RPL34
		SLAIN2
		LRRC37B
		WDR77
		HRASLS2
		COPG2
		OR52A5
		LOC100129448
		PLCZ1
		SCN1B
		LOC285296
		LOC650796
		C10orf108
		KIF27
		AKR1B1
		ZNF423
		RNY4
		LOC338579
		C21orf29
		SEMA6D
		PCMTD1
		LOC100131320
		LOC100132247
		DHRS4L2
		ALS2CR8
		ST5
		RNU4-1
		ARSD
		LOC644068
		C4orf51
		VWC2
		PHLDA2
		COL16A1
		POP1
		KRTAP6-1
		SLC29A1
		REG1A
		NR0B2
		PDE4B
		CSNK1G1
		KRT7
		MAFB
		C1orf54
		LOC644634
		LOC100130174
		CA3
		LOC646449
		LOC644684
		RNASE1
		VTRNA1-1
		PTTG2
		LOC100132306
		C7orf54
		SNORD3C
		STS
		LOC653889
		LOC643231
		UNQ9370
		LOC100130311
		LOC645196
		KIAA1211
		C14orf139
		LOC100133264
		CASP9
		IMMP2L
		MIPOL1
		OR51D1
		LOC647960
		C21orf41
		CAT
		LOC653543
		CCDC54
		MADCAM1
		MEI1
		AK5
		LOC649757
		LOC729704
		CPS1
		ALG5
		ABCA2
		SNORA36A
		LOC642684
		C12orf56
		PITRM1
		ADM
		LOC100130123
		ABCB6
		LOC647008
		LOC653527
		SPRY4
		RORC
		NUAK2
		SNHG1
		MANSC1
		INHA
		IL1B
		MIR505
		GDF1
		FLJ41327
		CTSA
		TDRD7
		UBFD1
		CDKL5
		C17orf44
		IGF2R
		BMX
		LOC728290
		MT1A
		RAD54L2
		TXN2
		SREBF1
		GRK7
		TXLNB
		C16orf75
		CLTB
		LOC100133435
		PEX12
		PMP22
		CNNM2
		CECR4
		LOC440895
		GOLGA8G
		LOC100129828
		DHX58
		TREML1
		PARP9
		LOC440944
		OR1S2
		LOC440297
		LEPREL1
		PPP2R3A
		PLEKHA6
		KRT18P26
		SIK1
		PVRL4
		ITIH4
		GJA5
		MIR376C
		CFD
		ERCC-00164
		HTRA4
		CACNA1G
		SPC24
		BRWD1
		C1QTNF1
		SLC6A3
		APC2
		ART5
		FNBP1
		C3orf71
		LOC644884
		SLFN12L
		DERL3
		TEX264
		PRCP
		TSPAN11
		SPINK1
		NBAS
		FIBP
		SLC17A1
		DCHS2
		L3MBTL
		MPZL2
		TSTA3
		LOC650212
		NFE2
		ANXA1
		TBC1D14
		CILP
		ACOT1
		ZFP28
		TXNDC15
		TESSP5
		C9orf85
		LOC643350
		SERPINA6
		LOC100133511
		SLCO1B3
		DSCR8
		BIK
		GJA1
		FBXO8
		VEPH1
		AKAP7
		OR14A16
		CCBP2
		TGM2
		ACYP2
		DNAJC22
		LOC728635
		GRK6
		LIN54
		LOC100133178
		EPHA2
		SNORD3A
		LOC730038
		MTHFR
		ERCC-00076
		ADAMDEC1
		LOC728241
		TMED10P
		SLC2A13
		FBN2
		MLL
		ATP8B2
		LCT
		DICER1
		ZNF141
		HIF3A
		MAPKAP1
		LOC644429
		VAMP1
		HLA-E
		LOC648790
		CREG2
		LOC644303
		C5orf15
		UBA7
		LOC121952
		HSPB3
		LOC100049716
		TNFSF10
		C1orf138
		MBOAT1
		TSPAN8
		LOC100131431
		MUC1
		SLC2A3
		PNMA5
		CPLX1
		LOC641772
		MYH9
		CENPH
		LOC646615
		IDH2
		LOC728607
		TLR6
		NOP2
		LOC645208
		LOC652471
		FAM14B
		SGCB
		C6orf150
		LOC642558
		ACP2
		HYI
		KRT3
		AIM1L
		ITGB1BP3
		C14orf147
		LOC647037
		MTMR8
		LOC441177
		LOC439953
		JAG1
		HSPA4
		PAPPA
		LOC391655
		TRH
		RAB26
		RRP9
		CAPN9
		POM121L1P
		IFT80
		C11orf58
		LOC649143
		NUDT18
		NAGA
		LOC649970
		SMAGP
		GJB3
		FOXO6
		LOC650751
		APLP1
		RPS19BP1
		MPND
		CHST13
		CTF1
		USP9X
		LOC284422
		C4orf36
[truncated: 4,135 more rows]
