# Supplementary material for: Association of SNPs in the PAI1 Gene with Disease Recurrence and Clinical Outcome in Bladder Cancer
Source: Int J Mol Sci. 2023 Mar 3;24(5):4943. doi: 10.3390/ijms24054943 (PMC10003630; doi:10.3390/ijms24054943)
Supplement: Supplementary file 1 [file ijms-24-04943-s001.zip › Supplemental Table 8.xlsx]

## Sheet: 5637-UROtsa
Table S8. The gene list of Venn Diagram for DEGs WT vs rs7242 between 5637 and UROtsa.
Names	total	elements
5637 UROtsa	2350	ELMO2
		GPR98
		PDCL3
		LOC653421
		BRIX1
		LOC646734
		LOC729926
		CDC25B
		DIMT1L
		LARP7
		MIR630
		HS.570330
		PGBD5
		ROR2
		LOC646103
		BOAT
		PTP4A2
		NDUFS4
		COL18A1
		LOC644695
		ASS1
		UQCRC1
		LOC643346
		PECI
		UNG
		DCUN1D5
		C16ORF72
		DEFB125
		TTTY14
		RPL4
		RBPMS
		LOC652875
		LOC643702
		HUS1
		POLD2
		RG9MTD1
		ZNF146
		DCTN1
		C1QBP
		TCP1
		FST
		ASTN2
		LOC645387
		NUP85
		LOC100132394
		THOC7
		SQLE
		GLIPR2
		LOC652101
		ERCC8
		ALG9
		SNCA
		PHF12
		PSMB8
		AP2S1
		THEG
		FLJ10996
		LOC728533
		SLC35A1
		ALAS1
		CRLF3
		CRTAP
		EFCAB4A
		BANF1
		HMBS
		TDP1
		FAM83A
		NLGN4X
		RB1CC1
		LOC649679
		EIF4E
		SLC29A4
		LPAR3
		LOC643272
		LOC401847
		PRMT5
		LCLAT1
		CEP63
		LOC647197
		TACC1
		KLHDC3
		LOC653424
		EGFR
		LOC643972
		CREB1
		LOC149478
		ZNRF3
		LOC100131187
		AGL
		CCNB1IP1
		FAIM
		LOC644739
		ABL1
		PTPRG
		LOC650157
		TXNRD1
		TNRC15
		IER5
		ADAR
		SRPX
		BRE
		TRA1P2
		COL4A6
		NOL7
		BRMS1L
		PANK2
		C3ORF23
		RGS12
		HS.563340
		LRRIQ1
		SAA4
		C18ORF55
		MRPS21
		MBP
		MTCP1
		PDCD1LG2
		TERF1
		ZNF703
		TIMP4
		TPR
		MTX2
		HS.445414
		LOC391142
		NDP
		SUMO1P3
		LOC100130053
		HRSP12
		KTN1
		TRIM5
		RRAGB
		KIAA1751
		SDHA
		VEGFB
		SAFB
		MAPK8IP1
		ANKZF1
		NFKBIL2
		CCDC51
		KLF3
		KCTD14
		SLC44A4
		GMPR2
		DFFB
		SMARCD1
		ARHGAP17
		LOC645693
		CD55
		NUP93
		HNRPUL2
		ATP6V0B
		PCTK2
		RAPH1
		EZH2
		LOC100133312
		C12ORF56
		ANKRD28
		COMMD7
		MED10
		SCD5
		LOC642469
		ATP2C1
		CCDC104
		SLC12A2
		CD58
		STRADA
		PKD1L2
		FLJ22662
		LEF1
		TRIM78P
		LOC728876
		PPHLN1
		STC1
		YY1AP1
		SULT1A1
		RAB23
		RHAG
		PPP2R5C
		HS.276854
		LOC283174
		HS.552799
		GCET2
		CPM
		HS.547587
		LOC100130905
		FBXO5
		HK1
		CDC26
		LOC648210
		MRPL35
		OVOL2
		CSE1L
		LOC100129095
		MRPL50
		ATG9A
		HS.582988
		SLC35C2
		LOC285741
		MUC4
		LOC649553
		SNORD34
		LOC644075
		GTF3C2
		F8
		C8ORF55
		RPL36AL
		FXR1
		ZMYM3
		CASP3
		LOC440926
		PTPN1
		IFITM3
		PILRB
		ANAPC11
		SDCBP
		LPHN1
		LOC155100
		LSM5
		CKLF
		NUP160
		KIAA1529
		A26C3
		FGA
		FAM116A
		IQGAP1
		MGC25181
		PUS7
		TUBB6
		KCNQ2
		DPH2
		DIAPH1
		CORO1A
		COG5
		COPS8
		SNRPN
		MRPL49
		PAX8
		FLRT2
		DZIP3
		NOMO2
		C6ORF125
		HS.98458
		TMX1
		C7ORF27
		DISP2
		ADAMTS13
		MATN2
		FGL1
		ARHGEF6
		TGFBR2
		DEAF1
		HERC4
		PEMT
		UGP2
		SCRIB
		LOC222967
		CKAP5
		FAM48A
		FOXD1
		DIS3L
		HDGF
		TMEM2
		FLJ22184
		ASB17
		HS.573131
		LOC729686
		LOC203547
		UGCGL1
		MTMR3
		TMEM16A
		PGD
		DHX36
		CDKAL1
		VAV3
		MTMR11
		ATMIN
		PAK2
		LOC727935
		ATP2B1
		HS.317248
		NBPF15
		TRAPPC6B
		ZNHIT6
		PLCE1
		PTPLA
		G3BP1
		NT5DC1
		LOC727896
		LOC642597
		RPPH1
		NOC4L
		LOC100133598
		KPNA2
		LOC728866
		GOLGA3
		MGAT4B
		PLEC1
		LOC100131403
		RIBC1
		POLE3
		DNM1
		LOC442240
		SLC7A3
		WBSCR22
		PDCL2
		NIPBL
		ZNF331
		C10ORF40
		PHF16
		LIF
		AFAP1L1
		NACAD
		CST3
		SLC22A16
		CD99
		CRP
		CCDC18
		STK40
		MGST1
		ALPP
		MMP23B
		USP4
		NUAK1
		LAMB3
		CTSB
		MGC39900
		NGFRAP1
		ERCC1
		PARK7
		C1GALT1C1
		FHIT
		PANK1
		PTGS2
		LOC100131166
		UBE2D3
		CCNDBP1
		SCCPDH
		HS.570988
		LOC729259
		TNFRSF19
		PPIL5
		LIMS1
		FAM89A
		ACAN
		CHST2
		RUFY1
		TNFRSF8
		DAG1
		NUF2
		TRMT11
		WWP1
		COBRA1
		EFEMP1
		CCT7
		EEF1A2
		RAB24
		DTX2
		H3F3A
		SEC16A
		LOC729298
		C8ORF48
		PUM2
		SAPS2
		MAPK1
		ATP9A
		C10ORF53
		LOC100133304
		RNF216
		HS.544017
		HS.568618
		LILRB3
		KIAA0514
		NUPL2
		IKBKB
		ZNF706
		KRTAP2-1
		C1ORF170
		ASPG
		LOC646300
		VPS37A
		TCEB1
		AKAP12
		LIPG
		LAD1
		HS.544707
		CCDC91
		PSMB4
		ARPC4
		KIAA1543
		MIR25
		MRGPRE
		SBK1
		PDE4B
		MAPRE2
		IL1RN
		HS.445239
		TAF3
		IL4R
		C17ORF77
		SMG7
		LOC100131096
		ZCCHC11
		SYPL1
		KIAA1211
		LAMC2
		CTNND1
		PDZD11
		N4BP1
		SLC35F2
		C1ORF107
		LOC388122
		SERF2
		LOC121792
		CLDN1
		RPS6P1
		LOC389517
		POLD3
		BEND3
		MORF4L1
		LOC100130919
		LOC100129354
		CBLC
		INO80
		LDOC1
		ASB9
		PYCARD
		C2ORF49
		C6ORF62
		RAD51L1
		TMEM54
		KRT75
		ASAH2C
		DONSON
		SLC30A9
		RAC1
		S100P
		MATR3
		DOCK2
		LOC645722
		FAM129A
		LOC642268
		ASCC3
		LYRM1
		LOC644029
		PAIP2
		SNRNP70
		CARD11
		CALML4
		ZC3H7A
		FAM75C1
		MAPKAP1
		SPRR2D
		RPA2
		ACOX1
		NUP153
		AGPAT3
		LOC730376
		LOC645527
		CDX2
		IRF6
		C16ORF88
		TIGD1
		IP6K3
		AASDHPPT
		MCM3
		C10ORF61
		CSK
		CNRIP1
		PDE8A
		PTK7
		C16ORF35
		LOC653163
		LOC729992
		ZC3HAV1L
		TSPAN33
		NOX4
		RNASEN
		TBX1
		LOC729681
		ACO1
		PLEKHA1
		LOC100132742
		SNUPN
		MTMR10
		ASPHD1
		HS.559654
		RETNLB
		TADA2A
		VPS13A
		LOC90586
		CSNK1A1
		DIS3
		SPATA7
		FOXK1
		MIR185
		LOC642771
		THSD7B
		LOC100128007
		DPH5
		HLA-F
		HBXIP
		MEN1
		BDH1
		SS18
		IKZF2
		MYD88
		TAF1A
		COMMD4
		DAB2
		CD244
		LOC100133177
		HS.576274
		HERPUD1
		MLLT6
		REEP5
		HK2
		MDK
		RASSF2
		TNFAIP8
		LOC100134098
		SCARNA21
		LOC441208
		FABP5L2
		TCIRG1
		GRN
		PTS
		C12ORF64
		LOC100131261
		CMBL
		C8ORF45
		VCL
		FYTTD1
		C7ORF23
		LOC441506
		LOC100133669
		HTRA2
		CRK
		PDS5A
		BTBD7
		LSM1
		C10ORF2
		PDZK1
		DNCL1
		ZNF443
		CXCL6
		CISD1
		LOC375295
		MKI67IP
		CLIP1
		HS.549668
		NUDT5
		HS.579949
		LAMA4
		CEPT1
		ETNK1
		C6ORF1
		ING1
		MED22
		CEBPB
		HMGA1
		CEP170L
		GABARAPL2
		UNC45A
		SDCCAG3
		KHDC1
		SEC22A
		HS.492187
		SNX17
		LOC441294
		ERAL1
		LOC100131787
		SNORD1C
		FAM134B
		CHORDC1
		LOC93622
		LEP
		CCDC34
		LOC100128956
		SNX16
		EED
		MFF
		TIAL1
		ZNF385B
		F2RL1
		COPS4
		LOC644101
		ARL13B
		PA2G4P4
		LOC100131643
		LOC100132499
		PXDN
		SLMO1
		ADAM32
		CNOT1
		HS.541685
		KRTAP24-1
		C12ORF32
		LOC646365
		DAPP1
		DNAJA3
		EPHA4
		CMTM3
		LOC644242
		UBE2L6
		OSR2
		KLHL7
		HS.572073
		PTPN2
		HCFC1
		KIF14
		TENC1
		COQ10B
		PSMF1
		LOC650029
		OPA3
		OAS1
		NDRG2
		CPVL
		TLK1
		MTMR12
		HS.544132
		GIYD2
		DOPEY2
		OPN3
		BCL7A
		TCF19
		NOTCH2
		SULF2
		ZNF136
		LOC642398
		CCDC144A
		MAPK7
		RRAGC
		PARD6A
		C21ORF91
		CPA4
		MELK
		PODXL
		CSRP2BP
		MIR361
		PARVB
		LAMA1
		SUPT16H
		GPR81
		COCH
		LOC643206
		MGC10997
		FSD1
		UPF1
		CDC40
		TRIM47
		TP53AP1
		TOR1A
		TRPV1
		LOC643273
		EIF2AK2
		PAM
		LOC652874
		WDR70
		GIPC2
		DUSP3
		C3ORF75
		RAD23A
		RNASEH2C
		SP110
		PRPS1L1
		SHQ1
		TRIM6-TRIM34
		EEF1D
		ABCB9
		NAT5
		C20ORF24
		ATP6V0C
		RPL3
		EIF4ENIF1
		TNFRSF21
		TBX3
		RGS13
		CRSP9
		IL25
		CDAN1
		SYF2
		LOC100129585
		ATXN1L
		PTPN6
		MAP3K4
		CLCN3
		GPAM
		POLH
		LRRC1
		DGKA
		NT5C3
		NLRP8
		ZNF263
		CLK2P
		TACSTD1
		UBE2A
		LOC728657
		HS.130562
		NCK1
		ZNF550
		LOC400446
		LOC728416
		MIS12
		PAK4
		TCEAL3
		TAF1C
		SOCS5
		LOC389223
		HS.120208
		MYCL1
		SLC27A2
		CALD1
		ALAS2
		ZNF823
		LOC389342
		EMR4
		MAP2K3
		ATXN2L
		PRCC
		SERPINA5
		LOC100129424
		ABLIM1
		ZNF22
		LOC100132663
		KIF26B
		RYK
		SOX7
		MBNL2
		KLK6
		ID3
		RECQL
		LOC642236
		DUSP22
		DIAPH2
		RFWD2
		SCOC
		DPH3
		OTOR
		LOC731789
		KIAA1530
		KIF11
		SLCO3A1
		FANCL
		SH3GLB1
		FLJ13611
		TCF12
		PRRG4
		RNF144A
		PRKCD
		TAPBP
		RUNX1
		LOC392437
		DYRK2
		C17ORF85
		LOC728689
		SLC22A1
		CCNL2
		ZFHX4
		AKR7A2
		SENP6
		VEGFC
		LARP1
		LOC148413
		HSPA6
		PHC2
		RUVBL1
		C7ORF70
		STX7
		AOF2
		ATM
		HS.534997
		LRRC15
		C20ORF165
		TMEM106A
		ACSL5
		HS.567184
		GART
		QPCT
		PRKAG2
		PLOD3
		SPCS1
		AIF1
		PLAA
		ARHGAP23
		KRT6A
		SIGMAR1
		EHBP1
		ZSCAN1
		RAB17
		PTBP1
		SNX7
		TMEM154
		SF1
		NUP210
		YWHAB
		LY6G5C
		SLC7A2
		RTN4
		DFFA
		LOC653293
		ZNF580
		ERP29
		C8ORF16
		MRPL3
		LOC146517
		AHSA1
		ICAM4
		LOC100130092
		HIST1H2BG
		TFDP1
		S1PR1
		LOC100130707
		ERBB3
		SNORA8
		DCTPP1
		LOC645241
		ULBP2
		HS.141748
		NR5A2
		CYP4Z2P
		MAGEA6
		TSNARE1
		PSMB5
		LOC400879
		TNFRSF10B
		CDK5R1
		QTRTD1
		WNK3
		LOC389816
		RRP12
		C17ORF51
		PPAT
		NIPA1
		DPP8
		HS.336511
		C22ORF30
		PAICS
		TOMM40L
		LOC644320
		ME3
		CDV3
		HIPK2
		DDX58
		HS.572889
		AKT1
		LOC646785
		SUDS3
		HPS5
		GP5
		F3
		LOC649661
		LOC401019
		WNT5B
		LPAR1
		HS.563969
		SERBP1
		PCNXL2
		STK38
		AZI1
		KIAA1026
		C10ORF58
		LOC100128683
		CSAG3
		LOC441811
		LOC100128816
		RPS26P11
		INPP5A
		C11ORF63
		CMTM7
		ORC5L
		SLC16A10
		PNKD
		ATRN
		ZNF788
		PDE12
		KCNA7
		MLC1
		MMGT1
		HS.570107
		LOC642645
		TRIM33
		TSC22D1
		SHC1
		INTS6
		TH1L
		ALDH3A2
		HTR7
		LOC392288
		LOC100133800
		KIAA1383
		HS.513108
		POLR1E
		SIPA1
		FABP5
		SORT1
		KRT17P3
		MEIS2
		HS.518527
		ABHD2
		ALCAM
		C1ORF203
		LOC728098
		ADAM19
		DNMT3B
		POGZ
		RAB5B
		FOXB1
		MRPS12
		ACOT7
		RASSF5
		HINT3
		LOC100129291
		CNOT6
		PXMP2
		SYTL1
		C5ORF15
		LOC653539
		ZNF275
		SULT1A2
		MIR29B1
		CLDN9
		HS.554324
		CSRP1
		LOC730107
		ASAP1
		AMMECR1
		SEC13
		LOC134997
		AKR1C4
		LOC100130967
		LOC100130818
		CRCP
		HS.547738
		WIPI2
		STK3
		REPS2
		VEZT
		BAG3
		LOC728790
		PRKDC
		HS.382212
		RAXL1
		NET1
		SURF4
		BCAS2
		AADACL1
		KCNMB3
		LOC283849
		TPD52L1
		PCTK3
		ZWINT
		APEX1
		MRPL11
		ADRA1D
		TMEM5
		BIRC2
		TPST2
		ERGIC3
		CREB3L4
		COLEC12
		TNFRSF25
		UBE2T
		SGK
		MOCS1
		NAP1L1
		PTDSS1
		ABCC9
		KIAA0363
		SKP1A
		GPC4
		VAC14
		LOC100130776
		SMAD2
		PRKCZ
		CCDC125
		TSC1
		RHOU
		C1ORF115
		ZC3HC1
		RBM14
		TNFSF11
		SEC24B
		MYLK
		CICE
		CEP55
		WDR7
		BLCAP
		TUSC3
		IARS
		ARFIP1
		LOC100133422
		CHRNB3
		BMP1
		PDE7A
		VARS
		MFAP2
		POLE4
		PSMD4
		SLC29A1
		SAA1
		MRPL27
		FBXW7
		RAB11FIP1
		PKIA
		EIF2C2
		KRT19
		SBDS
		TIPRL
		LOC644617
		UBE2Z
		SLC39A8
		LOC728465
		LOC388621
		OTUB1
		PSMC5
		FNTA
		LOC652894
		GTF2I
		RPL37A
		CPS1
		PREPL
		RABGAP1L
		SPRY4
		NMU
		RBM39
		RGS17
		KPTN
		LOC100132859
		HAX1
		LOC647993
		TRAPPC3
		AKAP11
		GLB1
		DTX3
		MMP10
		SNORA57
		LOC100128781
		REPIN1
		GINS2
		CYP1B1
		STEAP1
		VAMP8
		FAM178A
		MPZL2
		LOC100133563
		LOC642956
		SAMD3
		MRI1
		GPX7
		WDR54
		ZDHHC16
		LOC648927
		BRMS1
		TAF1B
		CASP10
		LOC100133991
		EVI1
		FAM72B
		LOC647389
		USP24
		MEF2A
		ASF1B
		PACRGL
		LOC391730
		FRAT1
		LITAF
		MIR300
		IL13RA2
		MTHFD2
		OAS3
		ODAM
		MTFMT
		KIF20B
		RBBP4
		LOC389791
		CCDC86
		MAP6D1
		NSL1
		KBTBD11
		RBMY1A3P
		LOC653086
		TUBA3D
		ZNF644
		BMP4
		ISG20L2
		PRDX5
		TXNDC5
		UTP14A
		TES
		BHLHB9
		BEX4
		BAT3
		AADAT
		ATP5EP2
		COL13A1
		NXT1
		RAN
		UFC1
		MIR15B
		HMGA2
		GAR1
		C11ORF49
		ACSS2
		NSUN2
		SCARNA3
		RLN2
		LOC644642
		LOC653820
		MOXD1
		SMCR7L
		FAM195B
		OR51A2
		ITGB1BP1
		KRIT1
		LOC653053
		LOC728253
		SP100
		EPB41L2
		PPM1B
		LOC100128822
		ZDHHC9
		SEPX1
		VGLL2
		HCG4
		WNT7A
		RPAIN
		EEF1E1
		METRNL
		LOC729057
		RIPK1
		PARP10
		SPINT1
		HS.540516
		LOC729389
		MRPS27
		PAPSS1
		CABP2
		ELF2
		TGFA
		DKK1
		KLHDC5
		C15ORF44
		IPO11
		RNF40
		TM7SF3
		LOC387867
		LOC169834
		LOC653321
		LOC100132992
		DNAJB12
		MORN4
		CXCL5
		LOC644714
		LOC158730
		RGS10
		PLD3
		EPHB6
		LOC649159
		PSMD7
		C6ORF141
		SCARNA27
		CABLES1
		LOC728006
		C20ORF117
		ATP6V1D
		DDR1
		PMEPA1
		FBXO18
		C6ORF106
		UBE3C
		HOXC6
		SNRNP27
		NMD3
		ADAM15
		ZGPAT
		LOC441453
		ZMYM6
		LRRC14
		LOC606724
		S100A13
		CCDC9
		HS.25555
		RFPL1
		OSBPL5
		MMP9
		LOC100131541
		DHRS2
		EXOC6
		XDH
		GCSH
		KCNG1
		CCNI
		PARN
		AGPAT1
		CAPS
		SCYL3
		DMC1
		FAHD1
		LOC728969
		CNPY4
		LOC440063
		NAT8L
		CCDC41
		FBXO11
		PSMG4
		AMY1B
		TPM3
		CBLL1
		COX8A
		MTMR14
		POMT1
		PTPN5
		CYP1A1
		LOC440349
		BTF3
		LOC645355
		FAM10A4
		C6ORF132
		HDHD2
		PSG4
		NBPF3
		SDHALP1
		IL18BP
		CXCR7
		LOC100128519
		NFYC
		EIF4E2
		TTC13
		TTC3
		IL23A
		SLC2A10
		HS.520328
		TANK
		TM9SF4
		AQP11
		KALRN
		TALDO1
		NUP133
		RBMY2FP
		FAM129B
		NCK2
		DVL1
		C15ORF23
		LOC730990
		PTP4A3
		LOC647786
		FAM96A
		MME
		CCDC14
		MFI2
		NR4A3
		LOC652887
		TSTD1
		DUSP10
		AMPD3
		HS.355933
		STMN1
		GALNT10
		STK39
		RPS6KA2
		LOC644162
		HS.244140
		SCARNA22
		KIAA0240
		RPE
		UNCX
		C7ORF29
		AXL
		CD276
		CSNK1E
		KRT72
		CCDC117
		UBN1
		CTNNA1
		CGI-96
		IL10
		LOC100128230
		LOC653110
		DPM1
		FUSSEL18
		LOC644629
		LOC257054
		AFAP1
		RNF146
		FAM150A
		WDR74
		GTF2IRD2B
		CLDN14
		TAGLN3
		LOC652466
		TIMM23
		OAS2
		DEGS1
		TMEM50B
		NUDC
		LOC729513
		DNAJC5B
		SCARA3
		HS.473191
		SLC16A4
		DUSP27
		LOC283481
		CMTM4
		HTRA1
		RUNX2
		ADORA2B
		CRIP1
		SLC1A3
		CABYR
		HS.572425
		LOC651546
		LOC729680
		CLEC2D
		LOC730455
		RASA1
		C17ORF81
		ARPC5L
		EXO1
		PIK3R1
		MAF
		STAMBP
		CCDC16
		TCF20
		LOC100132717
		PITPNC1
		SNORA71C
		ATPBD4
		LBH
		SYNM
		LOC100130519
		SETD4
		DDX56
		TWIST1
		MRPS18B
		ZNF682
		ARL5A
		CGB1
		ITGB5
		SMAD6
		RBMS1
		ST6GALNAC1
		CHST8
		ARV1
		EIF6
		POLR2L
		LOC644464
		LOC441958
		HOXC13
		HCP5
		THOC5
		NGRN
		MECP2
		PSMA1
		ACACA
		LNPEP
		YARS2
		FBXO22
		THAP11
		LOC653489
		LOC642513
		MAGEE1
		LOC442060
		INSC
		TNFRSF11B
		DEM1
		PIGV
		HS.544814
		CS
		ARL4C
		LOC645644
		C11ORF54
		LOC643509
		EXOSC9
		FAR2
		POLA1
		SRP68
		COL6A2
		LOC388160
		RPAP3
		ITGB4BP
		ARPP19
		BOLA2
		ABCC3
		CPN1
		EDNRB
		SCD
		STAT3
		TRPT1
		LOC100129186
		SEZ6L2
		OXR1
		CCBL2
		KLF12
		BRP44
		PRPSAP1
		C11ORF41
		KEAP1
		LOC100129657
		DFNA5
		C10ORF59
		LOC645162
		CCRL2
		PRPF40A
		NPY5R
		PRDX3
		C8ORF41
		SMC2
		FAM86A
		C16ORF53
		LOC200030
		ZNF512
		HS.123119
		DUSP6
		HGD
		C2ORF47
		INA
		CLEC14A
		NQO1
		SPNS2
		LOC653184
		FOXL2
		HNRNPAB
		EFNB2
		PIGN
		GALNTL1
		TMEM177
		C1D
		SNHG8
		NFATC2IP
		C9ORF144
		GPRASP1
		HSPH1
		COL17A1
		KIF24
		LYNX1
		RBM18
		WDR5
		SFRS18
		SLC38A1
		PARP3
		ZFR
		LOC643873
		FLJ20699
		SLC25A28
		PABPC1
		CATSPER2
		LOC23117
		TMEM126B
		CTPS2
		NDUFA9
		LOC644006
		HS.550042
		LOC650465
		MIR572
		DTWD1
		KRT6B
		LOC728126
		CTSH
		C9ORF40
		TTC9C
		DCTD
		HIP1
		LOC642477
		AMAC1L2
		ATG16L1
		SEPN1
		CUTA
		SFRP1
		SUOX
		CLIC6
		SMAD5
		CDK10
		HLX
		PUM1
		SPOCK1
		H2AFY
		ACTN4
		LOC728919
		ARRB2
		SLC7A6
		HS.541130
		HS.544828
		CERK
		LOC100130921
		POLR3K
		CAND1
		NASP
		LOC284441
		GNAS
		LOC653270
		WDR59
		GATA6
		SLC6A15
		YME1L1
		SON
		MGC57359
		LOC729839
		LOC642804
		RGL1
		DLGAP4
		PALM2
		NTAN1
		NUP88
		NOMO1
		CBFA2T2
		NGDN
		PNOC
		ATP1A1
		LOC161527
		AURKB
		RBM9
		TOR1AIP1
		SPRR2F
		NAT15
		ITGB1
		SGK1
		LOC644326
		HS.558212
		HS.555181
		ZNF827
		DSE
		LOC100131532
		ENO2
		PEX26
		LRP5
		NAV2
		LOC644191
		CNOT7
		RUNX1T1
		LRRC61
		PPM1E
		LOC731631
		S100A16
		MORN5
		HS.130155
		LFNG
		C16ORF33
		RPS26L
		NEK10
		COL8A1
		CDCA5
		SPAST
		TEAD4
		ZNF608
		NCOA5
		LOC285804
		GGH
		HAS3
		KPNA4
		PPIL3
		LOC341965
		MIR497
		PPP3R1
		COPE
		TMEM203
		SRPX2
		ST6GALNAC4
		LRRC37B
		LOC646576
		FEZ1
		SLC35E1
		MGC35361
		HS.569199
		LOC650796
		TNFRSF14
		RNF160
		SRC
		TINP1
		CRMP1
		LOC100008589
		DDX59
		KTELC1
		SP3
		GOSR2
		FLRT3
		LOC391169
		MED24
		PPA2
		ZNF32
		AGAP3
		PRKCQ
		TPM2
		STXBP1
		LOC730226
		IDH1
		NFKB1
		VRK3
		C6ORF114
		SP8
		IGF2R
		TGFB1I1
		UBE3A
		TOP2B
		PWWP2B
		UBTF
		WDYHV1
		AKR1A1
		CLTB
		IFITM1
		GAS6
		LOC728554
		LOC653171
		ATP6V0E2
		FLJ20628
		PHLDB2
		C10ORF4
		MID2
		NUDT21
		ERC1
		THNSL2
		C1QTNF1
		EYA2
		ZNF652
		TMEM4
		CDYL
		PRCP
		TIA1
		SPTLC1
		HMGB3
		CYTSA
		HS.544242
		PTPDC1
		NRP1
		NLRP3
		UBE2E3
		RC3H1
		CCDC50
		HS.559604
		DICER1
		SULT1A4
		CYFIP1
		MOSPD2
		BDNF
		TFCP2L1
		LOC347376
		LOC642381
		CDH2
		GTF3A
		FLNC
		DHX40
		DLL1
		MYL6
		LOC649143
		LOC651175
		CENPO
		LOC649044
		PBRM1
		LOC647247
		RNF5P1
		LOC100130855
		LUC7L
		ANO1
		LOC100129165
		FHL2
		PSMB2
		CSF3
		GPATCH4
		LOC646106
		KIAA1147
		PDPK1
		KYNU
		RAD51C
		GNA15
		HS.278303
		LOC100131452
		FRAT2
		ACCN2
		CTH
		MAN2A1
		KLC3
		SEMA3B
		OCIAD1
		TMEM80
		DYNC1I2
		ALDOA
		ATF4
		CROP
		PDCD10
		ETF1
		MX2
		SIAH1
		BTF3L4
		SLC25A25
		THOC3
		PHACTR4
		P2RY13
		OGT
		ACRV1
		UROD
		PLXNA2
		PNRC2
		CD24
		REXO1L2P
		SLC36A1
		CDK5RAP1
		CYP20A1
		LOC100130734
		PACSIN1
		FLJ39827
		ZBTB33
		GSTK1
		DLK2
		SPG21
		LOC644613
		DLX5
		ETS1
		C6ORF218
		HOXB6
		SORD
		WDHD1
		STAP2
		LOC653924
		KIAA1618
		USP48
		LOC100134331
		CYP26B1
		PPP2R2D
		EDARADD
		CDH23
		HS.572444
		DYRK1A
		NCAPH2
		AUP1
		LOC641765
		CUL4A
		RNMTL1
		PDLIM3
		RNF149
		C11ORF34
		LOC283788
		CDCP1
		MIR425
		LOC391132
		NNT
		RAD21
		L3MBTL3
		LOC644907
		DUSP15
		IGFBP4
		UBR7
		CYCSL1
		LOC100133835
		CAST
		LOC646144
		ATP6V0E1
		LOC645914
		SUCLA2
		AMD1
		TRIB2
		FLJ40722
		POLR3B
		DNAJC10
		SHISA5
		CD44
		KCNMA1
		LOC641814
		ATP5F1
		TOP1MT
		RCADH5
		HS.148844
		CCDC28B
		MSRB3
		KCNK6
		COPS7A
		TNS3
		CTAGE5
		SLC25A14
		CACNG5
		HS.582113
		TMEM19
		LOC643283
		NOL8
		C8ORF49
		GAGE1
		TRAF5
		HS.117259
		LOC652783
		CHRAC1
		WHSC1L1
		USP14
		HSPD1
		N4BP2L2
		CDIPT
		LCMT1
		FOXD4L1
		LOC643997
		MTX1
		VPS25
		CAPN12
		MUTYH
		NEU1
		EPGN
		GMFB
		LOC729964
		NFYA
		NMNAT2
		RBBP6
		GGN
		SOX9
		SLC4A5
		UPK3B
		IRF7
		ATP5H
		ISCU
		PHGDH
		GPS1
		LOC647150
		MGC57346
		TAOK2
		SLC16A2
		SDCCAG10
		LOC100128060
		LOC284890
		ZNF681
		LOC100134584
		LOC642346
		SNRNP48
		MRPS18C
		SP4
		ICAM2
		ZC3H11B
		LOC148430
		PCDHGA4
		WDR82
		LOC441876
		GPR110
		MKKS
		ADCY1
		LOC729859
		PLXNA4
		DEPDC1
		KIAA1429
		ZNF695
		DKFZP434N035
		ADRBK1
		ACADM
		HS.583132
		CHMP2A
		FVT1
		BLMH
		LOC731486
		SPRY1
		SNX5
		FUT3
		RGS11
		PSMD6
		UBOX5
		FARSA
		PLAC1
		TAZ
		CRELD1
		LOC729373
		PDZD2
		LOC440093
		GPR56
		OGFOD1
		PLEKHA2
		PDE4DIP
		LOC728844
		ALKBH5
		MGC40489
		LSR
		EIF2B1
		C14ORF93
		JMJD8
		CACNG1
		MLKL
		KLHL5
		PLA2G16
		ZFYVE27
		BOLA3
		GNB1
		LOC650651
		LOC728772
		TIGD3
		ST6GAL1
		ADSS
		SKIL
		NFKBIA
		GAK
		FBXO6
		DOCK7
		DNAJB14
		LOC643856
		ROR1
		RFC5
		PHF11
		KCNS3
		CYP4B1
		HS.547601
		MAEA
		CPSF2
		ABCA13
		HDLBP
		ZNF519
		METTL1
		CDC25A
		GNG8
		MACF1
		C10ORF11
		ENPP4
		SLC37A3
		CLRN1
		PTPLAD1
		DERA
		TPP2
		EXT2
		PDLIM7
		MSL3
		SPAG16
		HS.293427
		YOD1
		DBNDD2
		RPL7L1
		ANKRD35
		LOC644189
		SKP2
		LOC100129002
		MPPED1
		C8ORF73
		LOC388553
		CCM2
		TAP1
		ETS2
		CUGBP2
		FLJ40606
		MAPK9
		BEXL1
		TRIM37
		GRHL2
		SLC43A3
		MRPS7
		LOC100131081
		VBP1
		VANGL2
		ALG13
		SH3GL3
		C11ORF75
		DBT
		LGALS3BP
		MRFAP1L1
		HOXA10
		ARHGEF3
		SLC38A2
		AGK
		LOC100129933
		PKP4
		GSDMC
		COL4A3BP
		LOC100132863
		EIF3F
		VDAC3
		DHX37
		RUNDC2C
		GNL1
		ARMC10
		NFIC
		HMGB1L1
		LOC347411
		EXOSC8
		SEH1L
		LOC100129237
		LOC649946
		CDC45L
		LOC646330
		MSL3L1
		BCL7C
		ZP3
		LOC653884
		DHX9
		DUSP11
		HS.126473
		LOC100134256
		MRPL18
		LOC100133232
		GRB10
		LOC652618
		PRPF4
		C17ORF58
		WDR46
		LOC100129673
		MGAT2
		NOP56
		NOL12
		FOXD4L2
		LOC643894
		SASS6
		FLJ39632
		DHPS
		LOC100131360
		HCCS
		IL1R2
		SLC9A6
		ZFC3H1
		PLAG1
		BRP44L
		HS.156773
		HNRPH3
[truncated: 19,735 more rows]
