# Supplementary material for: Association of SNPs in the PAI1 Gene with Disease Recurrence and Clinical Outcome in Bladder Cancer
Source: Int J Mol Sci. 2023 Mar 3;24(5):4943. doi: 10.3390/ijms24054943 (PMC10003630; doi:10.3390/ijms24054943)
Supplement: Supplementary file 1 [file ijms-24-04943-s001.zip › Supplemental Table 9.xlsx]

## Sheet: 5637-UROtsa-WT_vs_930
Table S9. The gene list of Venn Diagram for DEGs WT vs rs1050813 between 5637 and UROtsa.
Names	total	elements
5637 UROtsa	5959	ELMO2
		PNMA1
		MMP2
		TMEM216
		LOC650339
		MGC87895
		C11ORF70
		AEN
		DECR1
		CADM4
		HS.538558
		RPS18
		SLC10A7
		LOC100131223
		DDB1
		XAB2
		KLHL14
		LOC653506
		MIER1
		LOC646734
		LOC199897
		PROSC
		EVC
		KIAA1199
		C14ORF80
		RNF216L
		STK25
		CDC25B
		BMP3
		TMEM180
		NUDT1
		ZNF212
		LOC100133233
		ZNF83
		LOC100128788
		OR8J3
		ABR
		FOXE1
		CTDSP2
		PGBD5
		RMND5B
		C5ORF39
		MAOA
		LOC646103
		RNF4
		F8A1
		DUS3L
		EIF1
		GPN2
		LOC100131471
		PMF1
		HS2ST1
		BOAT
		CRELD2
		LOC100133091
		PTP4A2
		CHFR
		COL18A1
		LOC728453
		LOC644695
		ELAC2
		ASS1
		USP42
		POLG
		LAGE3
		COX7A2
		TMEM125
		FUT4
		RP9
		PECI
		UNG
		LOC100130441
		GSTP1
		CHMP7
		DEFB125
		UBE2W
		KRT15
		GFI1
		FHL1
		TTTY14
		RBPMS
		FTHL8
		DNAJC30
		SFRS6
		LOC100132918
		ATP7B
		RG9MTD1
		ZNF146
		NENF
		HOXB5
		PRSS22
		C10ORF67
		PITX1
		ITSN1
		DCTN1
		LOC652850
		LOC730809
		TCP1
		FST
		PAWR
		LDLR
		ASTN2
		GPATCH8
		FLJ11783
		PGM1
		CPD
		PECR
		LOC645387
		SERP1
		HS.283139
		NUP85
		HS.57718
		RAB5A
		LOC728408
		ZNF614
		PARD6G
		LOC652101
		GRPEL2
		SAFB2
		DNAJC25
		KIAA0652
		HS.543412
		FRAG1
		ERCC8
		GPX4
		LOC646567
		C6ORF208
		RABGGTB
		SNCA
		HRAS
		BSDC1
		C12ORF48
		PHF12
		WSB1
		SOCS4
		PSMB8
		DDIT4L
		AP2S1
		VAT1
		LOC648253
		KRT34
		TOMM22
		SOCS3
		HS.146595
		LOC728533
		FLJ10996
		MALL
		RUVBL2
		BAIAP2L2
		LOC730235
		RPL27
		RDH11
		MBD2
		ALAS1
		FOXO1
		CCDC28A
		CBX2
		ZC3H14
		HMGXB4
		RNU105A
		LOC653061
		CRTAP
		EFCAB4A
		FLJ44450
		HMBS
		SLC25A24
		TDP1
		ARHGAP8
		GBA2
		LOC729679
		ZNF165
		FAM83A
		ARMCX3
		ZNF775
		BMF
		MAN1A1
		KIAA1600
		NLGN4X
		EXOC4
		CIP29
		SLC29A4
		TRAF6
		LOC646476
		LOC441018
		PTGER2
		LOC401847
		ST7L
		GFOD1
		COMMD1
		PFKFB2
		TSKU
		CLIC4
		C8ORF76
		C1ORF216
		ALOX5AP
		ZNF16
		SAMHD1
		EFHD2
		LOC650668
		NBEA
		LOC653424
		EGFR
		LOC730083
		SLC25A4
		NDRG1
		LOC390183
		PRKD2
		FAM134A
		CREB1
		TMPRSS3
		LAT
		ZHX2
		CDT1
		2022-09-02
		AGL
		CCNB1IP1
		HS.91389
		GIYD1
		SEC61G
		SNORA1
		FAIM
		LOC100129118
		LOC644739
		ACSL1
		ABCC5
		ABL1
		PTPRG
		LOC650157
		LOC643293
		CCNE2
		LOC136143
		PPP1CB
		SLC3A2
		IER5
		SNORD113-6
		MVK
		HRH1
		PRKRIP1
		HS.562726
		C17ORF60
		DDX21
		LRSAM1
		ADAR
		SF4
		HS.193767
		INHBE
		TOX2
		UNC50
		BRE
		TMEM218
		LOC647340
		TRA1P2
		LOC729222
		LOC727833
		COL4A6
		TOMM70A
		MED31
		ZNF532
		LOC728060
		POLR2J3
		BRMS1L
		PANK2
		C3ORF23
		C2ORF30
		MAN2B2
		RGS12
		EIF1AY
		RAPGEF5
		SAA4
		C2ORF25
		SLC2A4RG
		LOC649821
		ZNF830
		MBP
		LOC283116
		PTRH2
		CHURC1
		HS.541330
		FNDC3B
		MTCP1
		DUS1L
		TUBGCP5
		CRSP2
		TPPP
		SNRPB2
		LOC389435
		RAB28
		LOC729559
		OR2M3
		PKP3
		LOC728037
		IL28RA
		LOC100132041
		UPF2
		LOC399988
		SORBS3
		DOPEY1
		TERF1
		KIF22
		SFXN4
		ZNF703
		MYL6B
		C5ORF54
		LOC730415
		HLA-C
		TIMP4
		SLIT2
		ZSWIM3
		KCNMB4
		CIDEB
		LOC100128354
		CASP4
		TPR
		MTX2
		C1ORF210
		BRD3
		LOC391142
		UGT8
		SFXN5
		NDP
		SLC4A4
		RHOBTB1
		RPL38
		SUMO1P3
		MAP7D1
		LOC652458
		AOX1
		JRKL
		TMOD3
		KLK3
		LOC100130053
		PHKB
		LAPTM4B
		C11ORF36
		TRIM5
		APOC1
		RNASE4
		C6ORF59
		PARD6B
		RRAGB
		STARD7
		SHMT2
		UQCRH
		SDHA
		ZNF17
		FLJ22675
		ZNF280D
		VEGFB
		COLQ
		ALPK2
		NSUN4
		FANCD2
		ANKZF1
		LBR
		LZTS2
		ANKRD37
		KCTD14
		PRAGMIN
		LOC644563
		GMPR2
		GPHN
		DFFB
		C1ORF53
		AIFM1
		LOC728343
		MRPL4
		MALT1
		C1QC
		ZNF85
		LOC441155
		FAM127C
		SLC25A37
		SMARCC2
		CCDC12
		USF2
		LOC652726
		DSP
		IRF2BP2
		ZNF230
		ZNF434
		SMARCD1
		SH3RF3
		LOC158301
		ARHGAP17
		KCNIP3
		LOC645693
		SFPQ
		LOC399940
		LOC642342
		STAG2
		LRTOMT
		SCARNA9
		CD55
		FDPSL2A
		HNRPUL2
		ZNF581
		NEDD4
		ESRRAP2
		NEK4
		ATP6V0B
		PEX14
		PCTK2
		FBLIM1
		RP5-1022P6.2
		CMTM1
		RAPH1
		EZH2
		GRB7
		ARMC1
		LOC100131196
		LOC441714
		LOC100133312
		TMC2
		LOC644979
		C12ORF56
		EXD2
		LOC729768
		LOC100132923
		CLK2
		SECISBP2
		C1ORF25
		PPAP2C
		GNG10
		PAG1
		ANKRD28
		LOC388789
		STMN3
		CDK2AP2
		HDDC3
		CXXC1
		CD40
		DYNC1LI2
		GDI1
		VSNL1
		RAET1G
		ZNF311
		MED10
		UFD1L
		WTIP
		FLJ25363
		SCD5
		LASS6
		C3ORF47
		C7ORF41
		C19ORF66
		DHRS13
		LOC649660
		CCDC104
		PABPC3
		THSD1
		SLC12A2
		CD58
		LOC644734
		LOC728855
		DNAH1
		LOC642775
		PSMC6
		ABCB1
		FLJ10489
		STRADA
		LLGL1
		LOC220998
		LOC728944
		CHKB
		TMPO
		KIAA1524
		HDGFRP3
		RRAS2
		FLJ00312
		LOC100133795
		PKD1L2
		ZNF826
		PPM1M
		C1ORF77
		FLJ22662
		LEF1
		CTPS
		MAPK14
		SERPINB2
		C6ORF66
		TRIM78P
		HS.560536
		LOC728876
		HS.537971
		PPHLN1
		RAPGEF1
		LOC345222
		STC1
		LOC391578
		SULT1A1
		RAB23
		ZNF516
		GGPS1
		MAP2K2
		LDHA
		HS.529743
		MRPL20
		PHF19
		ATP5S
		PPP2R5C
		ARSB
		MAD1L1
		LOC283174
		HS.552799
		INPP1
		ANKRD11
		GCET2
		CPM
		FAM59A
		FBXO5
		C14ORF43
		HK1
		C10ORF75
		TNKS
		DNAJC25-GNG10
		ARRB1
		LOC100131970
		SCAMP5
		EREG
		POLR3E
		CDCA7
		TBC1D26
		OVOL2
		PYGO2
		PPP1R10
		CSE1L
		ASRGL1
		LOC100129095
		SLC26A11
		C12ORF29
		LOC729769
		RIOK3
		GRAMD4
		ATG9A
		MRPS26
		ZNF787
		PELI1
		SLC35C2
		LOC285741
		MUC4
		LOC649553
		MIR1323
		LOC391013
		SNORD34
		GNB2
		LOC729978
		NUP50
		SULT4A1
		ARRDC4
		PLEKHF2
		F8
		IFRD1
		HEBP2
		CAMK2G
		HMGB2
		DMRTA2
		LOC650034
		TOPORS
		C1QL4
		FXR1
		ZMYM3
		CASP3
		LOC643993
		WDR47
		LOC648294
		RGS2
		C9ORF5
		KIAA1737
		NAPA
		PIK3R4
		NDUFV3
		BTBD3
		FAM119A
		EEF2
		RBM12
		LOC728597
		H2AFJ
		SCYL2
		LEAP2
		PILRB
		AQP7P1
		LOC441505
		ANAPC11
		LOC401068
		CD200R1L
		MOBKL1A
		CHM
		LOC220433
		LOC728658
		B3GALNT1
		DMKN
		COX6B1
		MSH5
		LGMN
		FAM136A
		RIN3
		KIAA0495
		RREB1
		MGC3196
		LPHN1
		SP1
		RPS15A
		LOC100133772
		C21ORF57
		CKLF
		LOC642897
		MBNL1
		FLJ20674
		HS.560741
		KIAA1529
		FLJ22639
		SERPINB1
		FIGNL1
		MGC25181
		LOC100127975
		C7ORF47
		KCNQ2
		NTN1
		ING4
		CORO1A
		COG5
		COPS8
		NGLY1
		C9ORF80
		NCBP2
		SIL1
		LOC642252
		ASB6
		LOC100130886
		ATRIP
		CEBPG
		FAM69A
		RBM22
		SHROOM3
		ISM2
		JAM2
		SNRPN
		PLEKHG6
		ASNS
		C6ORF70
		ISG20
		CCT6P1
		POLR1D
		GIN1
		KRR1
		PC
		FAH
		MIR1301
		C7ORF26
		DNTTIP1
		SDHAP3
		PAX8
		MRPL40
		LOC390876
		SLC25A19
		FAM43A
		LOC730316
		FLRT2
		WRN
		DZIP3
		RIT1
		MAP3K7IP3
		FBXW11
		RNF144
		NPIP
		HS.102428
		HS.98458
		TMX1
		SAP30BP
		DGCR6
		C21ORF33
		BCDIN3D
		HS.231861
		SPSB3
		SLC39A3
		DISP2
		ADAMTS13
		SLC41A3
		LOC728324
		MOBKL2C
		TSPAN6
		FGL1
		ARHGEF6
		TGFBR2
		DEAF1
		CIB1
		PEMT
		RAB11A
		HS.575095
		LOC645683
		KIAA1328
		PATE3
		TTC23
		UGP2
		VPS52
		SNORA65
		RSRC2
		SCRIB
		FAM115A
		LOC100131139
		UNC119
		TMEM93
		ANK3
		KRT5
		JUB
		FAM48A
		PPP1R14C
		FOXD1
		CNIH3
		DOCK3
		FLJ22184
		KIF21B
		TEPP
		LOC100130764
		WNK1
		LOC729686
		GSDMD
		ST7
		POPDC3
		ERN1
		MGC42367
		NOTCH3
		UGCGL1
		CALHM2
		C9ORF95
		FBXO32
		MTMR3
		NCRNA00162
		ATP1B3
		TMEM16A
		ANP32B
		CDKN3
		ITPRIP
		IQCC
		FTSJ2
		WAC
		PYCRL
		VAV3
		MTMR11
		EIF3G
		ARHGAP22
		ALDH9A1
		RASSF1
		CARKD
		C13ORF27
		SMEK2
		ATMIN
		BTG3
		PAK2
		LOC727935
		ATP2B1
		PARM1
		PRR3
		KLHL24
		ARNT2
		ITPR3
		WDSUB1
		TFIP11
		LOC645058
		CNBP
		HSPB1
		LOC440820
		C20ORF72
		NT5DC1
		TMEM139
		AMZ2
		GDF15
		LOC727896
		PAIP1
		UBB
		ANKRD13B
		TCF25
		PPP1R13B
		TOP3A
		HIST1H4E
		UNC5A
		FAM86C
		NCRNA00219
		OAZ2
		SUSD2
		FADS1
		RHOT1
		ARL4A
		HNMT
		PCGF3
		LOC100131381
		RWDD2A
		LOC100134700
		BIRC5
		LOC150051
		LOC644033
		BCLAF1
		C21ORF66
		MGAT4B
		BBS7
		GLE1
		PLEC1
		C12ORF65
		METTL2B
		RASGRF1
		LOC389141
		C3
		MGC26356
		FLJ30058
		CP110
		HYOU1
		HNRNPR
		AADACL4
		STARD13
		HS.7572
		C2ORF82
		RACGAP1
		ERLIN2
		LOC100133070
		PDCL2
		NIPBL
		TMEM200A
		ZNF331
		HMGN4
		EIF3M
		ESRRA
		C10ORF40
		PHF16
		MBD5
		LIF
		PHLDA1
		HS.583307
		INO80D
		ZNF549
		LSM12
		NACAD
		LOC100132804
		CNIH
		DHX16
		LOC644360
		CCDC18
		SAC3D1
		STK40
		PIGP
		MGST1
		IL27RA
		SMPD2
		2022-09-03
		DGKD
		HNRNPUL2
		OPA1
		SNHG9
		USP4
		LAMB3
		PPL
		NCOA3
		C1ORF49
		BCKDK
		MGC39900
		NGFRAP1
		NEDD4L
		CRYBB3
		ERCC1
		BVES
		PARK7
		TUBA1A
		FLJ10374
		NAPB
		LMAN2L
		LOC100133459
		C1GALT1C1
		DPP7
		PPOX
		C3ORF38
		PANK1
		SPP1
		LOC100129550
		ASPSCR1
		LOC728672
		LOC100131166
		CCDC90B
		UBE2D3
		H2AFB3
		LOC388312
		ZNF561
		ZNF362
		LOC100131064
		IL21R
		2022-03-03
		CTSK
		TRIM35
		LRCH4
		EXOSC3
		FBXL10
		EIF2C3
		LOC646033
		HS.543956
		SLCO1B1
		ZNF565
		CCNDBP1
		SCCPDH
		PRMT1
		ITIH3
		TNFRSF19
		DENND2A
		PIM3
		GPR1
		MXRA5
		ACOT9
		PPIL5
		LOC645899
		DEFB121
		SLC19A1
		LIMS1
		FAM89A
		DCUN1D2
		LOC641995
		ARPC1A
		RUFY1
		RPS4Y1
		LOC402057
		DAG1
		PLOD2
		TSPAN2
		ZFAND6
		LOC647488
		HS.167721
		GYG2
		C2ORF29
		CTSF
		GNA13
		ZBTB4
		LOC728701
		LOC646853
		LOC440160
		CHD1L
		FUT8
		AGA
		TRMT11
		WWP1
		B9D2
		COBRA1
		PTTG1
		LOC651731
		CARD16
		CHMP4C
		GCDH
		SSR4
		ACCN4
		LOC100132795
		BBX
		EFEMP1
		RERE
		COMMD8
		HS.103173
		CCT7
		ZFX
		LOC642321
		C6ORF184
		RAB24
		SLC25A40
		FOXD2
		IFFO1
		HEBP1
		C20ORF7
		DTX2
		D4S234E
		DYRK3
		LOC729101
		RPLP0
		MKNK2
		U2AF2
		C11ORF73
		PALM
		LOC100131205
		LOC653641
		LOC644173
		FAM102A
		SAPS2
		CYP2S1
		LOC100133931
		ATP9A
		GHRLOS
		RNF216
		LOC730167
		USP46
		LILRB3
		POTEF
		KIAA0514
		NUPL2
		YRDC
		BLVRA
		LOC643300
		DAZAP2
		IKBKB
		BOK
		BTN2A2
		MYEOV
		FRG1
		SDHAF2
		ZNF706
		TMEM136
		TRIM66
		CBR3
		SIRPA
		LOC729242
		IGFBP6
		RNASE7
		ZNF142
		ANKHD1
		MUT
		VPS37A
		GCOM1
		TCEB1
		RPL34
		AKAP12
		C6ORF153
		LIPG
		LOC100128221
		LAD1
		LOC100133697
		HS.544707
		PAOX
		RBBP8
		ANXA2P3
		LOC285296
		LOC647361
		CCDC91
		C6ORF211
		CALN1
		CHST7
		C3ORF19
		MAPK13
		LOC645317
		ERO1LB
		LOC644937
		GUSB
		GSDMB
		TMEM97
		EXTL2
		PI4K2B
		KGFLP1
		CDK5RAP3
		GGCX
		ARPC4
		RNU4-1
		EGLN2
		KIAA1160
		KBTBD4
		KIAA1543
		MZF1
		WFDC2
		NDUFA7
		CHCHD10
		A2LD1
		SBK1
		NUP107
		OSBPL9
		PDE4B
		PLIN5
		FAM113A
		ARFGAP3
		IL1RN
		GRINA
		ADIPOR1
		C19ORF40
		CLIP4
		HS.445239
		LOC731950
		SMTN
		LOC644634
		C14ORF135
		PRAMEF3
		PCBD1
		C16ORF58
		NR2C1
		LOC25845
		MKI67
		IL4R
		LOC653206
		TM4SF1
		EMILIN2
		DZIP1L
		LOC100131096
		VASP
		SYPL1
		LOC727918
		LOC644745
		KIAA1211
		RPS27L
		TATDN3
		MIPOL1
		C11ORF1
		LAMP2
		ZNF746
		ATXN1
		LAMC2
		CTNND1
		HS.31532
		N4BP1
		LCP1
		C1ORF107
		DCAKD
		GUK1
		RHPN2
		VPS72
		SERF2
		PPIC
		IMPDH1
		ACP6
		C1ORF131
		LOC648980
		WHAMM
		C20ORF38
		CLDN1
		ABCC1
		FAM54A
		PCBP2
		SYCE1L
		GABBR2
		LOC729487
		AFTPH
		MT1A
		SNRNP200
		RPL10L
		LOC389517
		LOC652825
		PFKFB4
		LRRC57
		RNF11
		SCNN1G
		OBFC2A
		POLD3
		BEND3
		PHB
		MORF4L1
		ZC3H15
		ELK3
		CBLC
		C10ORF35
		C9ORF100
		GRINL1A
		HIGD2A
		SGK3
		INO80
		GCN1L1
		AMOT
		LOC440956
		C12ORF41
		LDOC1
		LOC390530
		EPHB2
		ACTG1
		NME1
		LACTB
		FAM101B
		LOC648771
		BCAS3
		HS.10862
		POLA2
		IFI27L2
		FAM45A
		EVL
		PYCARD
		ACSL4
		C10ORF118
		HS.253267
		COMT
		PDLIM5
		C6ORF62
		RAD51L1
		TMEM54
		SLC6A17
		HS.403972
		C17ORF70
		DUSP13
		LOC401805
		FLJ22795
		TRIM68
		UCK2
		LOC100129502
		FAM50A
		AGPAT9
		LOC653186
		E2F8
		CCDC25
		OTUD1
		YIF1B
		LOC100132727
		NBN
		OCLM
		ZSCAN18
		L3MBTL
		RAC1
		GTF2A1
		PNKP
		TC2N
		S100P
		MATR3
		LOC647276
		DCK
		MID1IP1
		LOC646139
		DOCK2
		TUG1
		DPYSL2
		LOC643384
		IKZF5
		ACAD8
		RBM35A
		CAMK1
		SLC39A7
		RFC3
		FAM129A
		ILF2
		ASCC3
		LOC91431
		TMEM18
		LOC644029
		PAIP2
		ZCWPW1
		ACAT1
		CARD11
		RSL24D1
		CALML4
		TSSC1
		FBN2
		LOC147727
		LOC442041
		HCG2P7
		MAPKAP1
		SPRR2D
		LOC647783
		MRPL24
		PRPF19
		RPA2
		PAK6
		MXD4
		C21ORF45
		PPAP2A
		ULK1
		C1ORF74
		C1ORF24
		ACOX1
		ATP5B
		ELF3
		CPSF3L
		AGPAT3
		MAGI3
		DHRSX
		CAMK2D
		LOC400301
		RPS27A
		CDC25C
		TSC2
		CCDC108
		PTPRB
		SPTAN1
		LOC100133823
		CDX2
		PPARG
		BBS10
		TMEM44
		PRDM4
		IRF6
		RRP9
		PPIG
		ZNF407
		RPSA
		C6ORF167
		LOC100133672
		PARP14
		EPB41L1
		RPS8
		FOXJ2
		TADA3
		IP6K3
		NR3C1
		LOC652152
		TMEM171
		YY1
		AASDHPPT
		CCDC138
		LOC100133390
		CKS1B
		FAM110A
		NBPF20
		TUFT1
		TMTC3
		LCK
		LOC729535
		AKTIP
		LOC648878
		RAMP1
		LOC100134560
		LOC645251
		PDE8A
		GAGE4
		HS.434989
		FN3KRP
		HS.553301
		TMEM57
		LOC100128689
		RGL3
		C3ORF64
		XRCC3
		TUBB4Q
		RDBP
		PTK7
		TWF2
		C16ORF35
		CYC1
		NYNRIN
		C11ORF2
		RPS26
		TTC39C
		ZNF234
		THOC1
		MIR506
		FAM18B2
		FBXO17
		TBC1D3C
		C19ORF28
		GAMT
		TSPAN33
		NOX4
		RNASEN
		TBX1
		SALL2
		STK33
		CLCN7
		LOC728440
		AMDHD2
		CABLES2
		RRBP1
		MAT2B
		MTMR10
		CXORF40B
		ASPHD1
		ARFGAP2
		RNU4ATAC
		NDUFB6
		GABPB1
		ANKRD24
		TADA2A
		VPS13A
		OSBPL6
		SEMA4B
		CSNK1A1
		LONP2
		LOC100128975
		HS.562118
		CHKA
		ANKRD9
		FAM92A1
		GAB2
		DIS3
		IQCB1
		SPATS2
		LOC728945
		SPATA7
		MAZ
		TAF6L
		MKRN2
		GALNT4
		LOC647046
		TFG
		HS.528284
		CCDC72
		FOXK1
		THSD7B
		UBE2G2
		DDX55
		RPS15
		ZNF618
		JAG2
		RN7SK
		LOC100128007
		ZBTB42
		DPH5
		HLA-F
		HBXIP
		HS.576072
		LOC648605
		CCDC84
		MEN1
		RARA
		BDH1
		FLJ35934
		MYD88
		PML
		CBFB
		COMMD4
		SERPINH1
		MGLL
		TMSB15A
		SLC5A12
		BCL2L11
		HERPUD1
		BPTF
		PIWIL4
		LOC728115
		NDUFAF2
		CLECL1
		WDR25
		DCAF15
		MYO19
		FADD
		FOXA1
		RPL23AP53
		ABI1
		LOC401127
		SLC1A4
		HINT2
		C17ORF95
		HS.132585
		JARID1D
		HIST1H2AK
		HS.151692
		LOC93349
		ENSA
		HK2
		LOC100130700
		MDK
		LOC645992
		RASSF2
		TNFAIP8
		LOC100134098
		SCARB2
		SLC16A3
		APLP2
		LOC441208
		CA2
		FABP5L2
		C20ORF111
		TAS1R1
		HS.104792
		SNORD80
		NOL6
		TCIRG1
		TRIM39
		BANP
		C18ORF10
		TRIP4
		SNX3
		FTSJ1
		FAM158A
		MSH2
		WTAP
		NECAB3
		MGAT4A
		LOC100131261
		LOC100128547
		RRM1
		PDE11A
		WDR67
		THUMPD1
		CLYBL
		ZFP112
		VCL
		FYTTD1
		FAM125B
		DTL
		RSAD2
		CRTC3
		LRRFIP2
		TTN
		SLC26A5
		RNF121
		ZNF93
		HS.531817
		ILKAP
		TMEM30A
		NEDD9
		SMPDL3B
		ETV5
		LOC100134393
		DKFZP761P0423
		BTBD7
		MAD2L1BP
		SCNN1A
		PGAM4
		IDUA
		C12ORF40
		LOC648622
		PDZK1
		ZNF443
		ZNF323
		LOC728262
		CXCL6
		NPTN
		CISD1
		ZNHIT3
		LOC653479
		UNC93B1
		SPCS2
		KRT18P30
		PRKAB1
		LOC375295
		RPUSD4
		ZNF654
		SS18L1
		TCEA3
		CEP152
		CLIP1
		HS.549668
		C20ORF52
		TTPAL
		TTTY5
		F12
		ELL2
		PVRL3
		ZNF30
		TRPC4AP
		LAMA4
		C2ORF15
		EIF4G2
		NUDT15
		CEPT1
		ETNK1
		SC65
		PEX5L
		BCAT1
		ING1
		ORC6L
		MED22
		CEBPB
		HMGA1
		CAPN7
		C6ORF134
		NANOS1
		ZFYVE19
		C2ORF68
		TTC9
		CEP170L
		MLPH
		NRG1
		C1ORF38
		DDX41
		UBE2D2
		GABARAPL2
		MARVELD2
		UNC45A
		GIT2
		CCDC115
		SDCCAG3
		LOC644990
		BOLA2B
		SCN5A
		ZNF192
		LANCL1
		ZNF645
		NLRP14
		HS.492187
		PLSCR3
		SPOCD1
		MPST
		DPM2
		LOC441294
		FARP1
		DPY30
		TUBD1
		GNL3
		C7ORF36
		C16ORF7
		MOSC1
		NAGPA
		MTHFD2L
		SLC6A11
		FAM134B
		LOC646895
		CHORDC1
		TRIB3
		ZSWIM1
		LOC93622
		TMX4
		ZFP161
		HLA-DRB4
		HS.544637
		IGSF3
		LY6K
		C14ORF131
		LEP
		C17ORF68
		DIP2A
		CCDC34
		PTPN22
		ITGA3
		LOC100128956
		GRPEL1
		ROCK2
		SNX16
		CCDC66
		EED
		HES1
		MANEA
		KIAA0020
		RBM10
		NCOR2
		MFSD8
		TIAL1
		HIST1H1E
		LOC652369
		ZNF385B
		F2RL1
		LOC390466
		HS.303217
		LOC650594
		GAS2L1
		ARL13B
		LOC100132499
		WDFY2
		DUSP5
		SLMO1
		A4GALT
		C19ORF54
		AQP2
		LOC340598
		CNOT1
		HS.551128
		IRS1
		LOC442727
		TMEM1
		MRPL34
		NUCB1
		C21ORF58
		HS.560740
		LOC100128326
		ARL16
		TACR1
		SNX25
		RHBDF1
		DAPP1
		LOC389137
		C16ORF56
		NFIL3
		EPHA4
		CMTM3
		LOC644242
		UBE2L6
		C9ORF27
		OSR2
		KLHL7
		LOC729423
		FAM18B
		HS.572073
		PTPN2
		LOC100130562
		AHR
		ATP6V1C1
		SORBS2
		PSMF1
		LOC650029
		SH2D2A
		MRPS24
		OPA3
		HS1BP3
		OR2B2
		DUS4L
		CHMP6
		CD151
		CYP19A1
		SCAMP3
		PACSIN3
		FBXO46
		SNORD35B
		OAS1
		SVIL
		PHB2
		ERMAP
		IGSF9
		C9ORF37
		CPVL
		TLK1
		ZNF384
		RPN1
		FAM160B1
		RNF7
		KCTD13
		KLHL28
		SLC38A9
		RFNG
		RBM7
		ACADVL
		ZBTB8OS
		BRI3P1
		EMR2
		GIYD2
		DOPEY2
		BCL7A
		SAT2
		PFTK1
		C3ORF14
		GABRE
		FIS1
		LOC389203
		LOC645018
		CD83
		VPS16
		TMEM90A
		IGFBP2
		NOTCH2
		SULF2
		TOR2A
		LOC642398
		CCDC144A
		MAPK7
		RRAGC
		PARD6A
		NUB1
		GCH1
		LOC401431
		IL15RA
		FBXL5
		MTP18
		ITGB2
		UQCRQ
		CSRP2BP
		KAT5
		PARVB
		LAMA1
		HS.558286
		LIPT1
		NSUN5
		MYC
		LOC100131835
		IL10RB
		LAMA3
		HS.582536
		COCH
		GPR81
		APOBEC3F
		C9ORF156
		MGC10997
		FSD1
		CA12
		NCOA6
		LOC644670
		SETD3
		ELK4
		C2ORF24
		TRIM47
		ACOX3
		TRIM6
		LOC642267
		TP53AP1
		TRPV1
		PES1
		AVL9
		ATG4A
		CC2D1B
		SLC22A5
		LOC440731
		LOC654194
		KRT18P17
		STK24
		DACT2
		DUS2L
		NUTF2
		GPIHBP1
		HS.548645
		EMID2
		ZFAND1
		DUSP3
		ANKMY1
		FAHD2B
		LOC642154
		RNASEH2C
		TXNL2
		SP110
		AGRN
		WDR33
		HS.44811
		CDON
		HS.417262
		BIVM
		HS.524108
		RAB2B
		ZC3H8
		HS.287720
		SLC10A6
		PTPRQ
		CARD10
		EEF1D
		RAB6A
		MIR599
		MSRB2
		BCR
		ZNF317
		ABCB9
		TRAK2
		STAB1
		LOC100133055
		LOC388813
		C20ORF24
		RPS6KA4
		FAHD2A
		LOC641977
		C16ORF71
		LOC646483
		LOC652427
		MINPP1
		LOC645173
		CLPTM1L
		ATP6V0C
		TTC39B
		FKBP3
		D2HGDH
		RPL18A
		KRT16
		LOC100132289
		CPEB4
		RPL3
		THBS1
		LOC648000
		ARMCX1
		C9ORF23
		MKL2
		TBX3
		MGC4677
		RGS13
		ELMO1
		LOC653314
		TRIOBP
		CABIN1
		CRSP9
		NCOA1
		IL25
		CHEK2
		CDAN1
		RBMX2
		HS.512106
		MCM4
		SYF2
		LOC728452
		CEP192
		RPL9
		ARHGAP5
		ATXN1L
		KIAA1731
		C16ORF30
		PTPN6
		BAHD1
		DGCR14
		LOC644254
		MAP3K4
		RPL23AP13
		CLCN3
		VSTM2A
		LOC648729
		PPP2CA
		LRP12
		SNAPC2
		C2ORF86
		LRRC1
		LOC730243
		GAS1
		DGKA
		NT5C3
		ZNF263
		CLK2P
		TACSTD1
		ABHD10
		SLC35C1
		UBE2A
		RBM41
		OSBP2
		UBE2E2
		LOC728657
		CDC23
		RAB11FIP5
		CDKN1A
		ZNF550
		SPIN3
		LOC400446
		MIS12
		TCEAL3
		CENPB
		TBRG1
		TAF1C
		LOC100130190
		CENPI
		RPP21
		FZD3
		SOCS5
		CFDP1
		ASTN1
		MYCL1
		HS.120208
		FOSB
		LOC100128765
		ZNF789
		HARS2
		DMWD
		AIG1
		KIAA1462
		WRNIP1
		LOC341457
		LOC729779
		PSMA6
		ZNF823
		KIAA0564
		LOC100130370
		IFNAR2
		CYB5A
		LOC100132658
		P2RY11
		ITGAE
		LOC389342
		PYCR2
		TMLHE
		EMR4
		ARHGEF19
		TSPAN17
		LOC646821
		NDUFS3
		PCOLCE2
		MAP2K3
		ATXN2L
		SCAP
		NARS
		PRCC
		ZBTB32
		SERPINA5
		GEMIN5
		ZNF697
		ZNF503
		COL12A1
		ABLIM1
		MAST3
		RHBDD1
		ZNF22
		RDM1
		ACTR2
		EDG1
		RAP1GDS1
		KANK1
		BCL2L12
		LOC100127993
		RAE1
		LRP3
		QARS
		SOX7
		NUFIP2
		MBNL2
		ADD3
		KLK6
		ID3
		FOXQ1
		LOC642236
		IRF1
		PTPRE
		PTK2B
		SOX4
		IFI27L1
		SH2D1A
		DUSP22
		LOC100131971
		NCRNA00157
		C16ORF75
		L3MBTL2
		MCRS1
		KIAA1522
		FLJ23584
		PSG8
		DIAPH2
		CRYZL1
		LOC646766
		C19ORF6
		RFWD2
		MAML2
		LOC728484
		SCYL1
		SCOC
		C1ORF135
		CTDSPL2
		ZBTB22
		LOC643189
		TSGA14
		DPH3
		THYN1
		KATNAL1
		UBE2I
		MEIS3P1
		GLRX2
		ARL5B
		SLC25A5
		MYO1C
		KIFAP3
		CNKSR3
		LOC442609
		RPL12
		COPA
		PTHLH
		SLC40A1
		LOC100128098
		ANAPC13
		LOC401076
		SLCO3A1
		FANCL
		XRCC6
		USP16
		C5ORF30
[truncated: 28,304 more rows]
