# Supplementary material for: Association of SNPs in the PAI1 Gene with Disease Recurrence and Clinical Outcome in Bladder Cancer
Source: Int J Mol Sci. 2023 Mar 3;24(5):4943. doi: 10.3390/ijms24054943 (PMC10003630; doi:10.3390/ijms24054943)
Supplement: Supplementary file 1 [file ijms-24-04943-s001.zip › Supplemental Table 10.xlsx]

## Sheet: WT_vs_Clones
Table S10. The gene list of Venn Diagram for DEGs WT vs Clones between 5637 and UROtsa.
Names	total	elements
5637_rs7242 5637_rs1050813 UROtsa_rs7242 UROtsa_rs1050813	1341	ELMO2
		LOC646734
		CDC25B
		PGBD5
		LOC646103
		BOAT
		PTP4A2
		COL18A1
		LOC644695
		ASS1
		PECI
		UNG
		DEFB125
		TTTY14
		RBPMS
		RG9MTD1
		ZNF146
		DCTN1
		TCP1
		FST
		ASTN2
		LOC645387
		NUP85
		LOC652101
		ERCC8
		SNCA
		PHF12
		PSMB8
		AP2S1
		FLJ10996
		LOC728533
		ALAS1
		CRTAP
		EFCAB4A
		HMBS
		TDP1
		FAM83A
		NLGN4X
		SLC29A4
		LOC401847
		LOC653424
		EGFR
		CREB1
		AGL
		CCNB1IP1
		FAIM
		LOC644739
		ABL1
		PTPRG
		LOC650157
		IER5
		ADAR
		BRE
		TRA1P2
		COL4A6
		BRMS1L
		PANK2
		C3ORF23
		RGS12
		SAA4
		MBP
		MTCP1
		TERF1
		ZNF703
		TIMP4
		TPR
		MTX2
		LOC391142
		NDP
		SUMO1P3
		LOC100130053
		TRIM5
		RRAGB
		SDHA
		VEGFB
		ANKZF1
		KCTD14
		GMPR2
		DFFB
		SMARCD1
		ARHGAP17
		LOC645693
		CD55
		HNRPUL2
		ATP6V0B
		PCTK2
		RAPH1
		EZH2
		LOC100133312
		C12ORF56
		ANKRD28
		MED10
		SCD5
		CCDC104
		SLC12A2
		CD58
		STRADA
		PKD1L2
		FLJ22662
		LEF1
		TRIM78P
		LOC728876
		PPHLN1
		STC1
		SULT1A1
		RAB23
		PPP2R5C
		LOC283174
		HS.552799
		GCET2
		CPM
		FBXO5
		HK1
		OVOL2
		CSE1L
		LOC100129095
		ATG9A
		SLC35C2
		LOC285741
		MUC4
		LOC649553
		SNORD34
		F8
		FXR1
		ZMYM3
		CASP3
		PILRB
		ANAPC11
		LPHN1
		CKLF
		KIAA1529
		MGC25181
		KCNQ2
		CORO1A
		COG5
		COPS8
		SNRPN
		PAX8
		FLRT2
		DZIP3
		HS.98458
		TMX1
		DISP2
		ADAMTS13
		FGL1
		ARHGEF6
		TGFBR2
		DEAF1
		PEMT
		UGP2
		SCRIB
		FAM48A
		FOXD1
		FLJ22184
		LOC729686
		UGCGL1
		MTMR3
		TMEM16A
		VAV3
		MTMR11
		ATMIN
		PAK2
		LOC727935
		ATP2B1
		NT5DC1
		LOC727896
		MGAT4B
		PLEC1
		PDCL2
		NIPBL
		ZNF331
		C10ORF40
		PHF16
		LIF
		NACAD
		CCDC18
		STK40
		MGST1
		USP4
		LAMB3
		MGC39900
		NGFRAP1
		ERCC1
		PARK7
		C1GALT1C1
		PANK1
		LOC100131166
		UBE2D3
		CCNDBP1
		SCCPDH
		TNFRSF19
		PPIL5
		LIMS1
		FAM89A
		RUFY1
		DAG1
		TRMT11
		WWP1
		COBRA1
		EFEMP1
		CCT7
		RAB24
		DTX2
		SAPS2
		ATP9A
		RNF216
		LILRB3
		KIAA0514
		NUPL2
		IKBKB
		ZNF706
		VPS37A
		TCEB1
		AKAP12
		LIPG
		LAD1
		HS.544707
		CCDC91
		ARPC4
		KIAA1543
		SBK1
		PDE4B
		IL1RN
		HS.445239
		IL4R
		LOC100131096
		SYPL1
		KIAA1211
		LAMC2
		CTNND1
		N4BP1
		C1ORF107
		SERF2
		CLDN1
		LOC389517
		POLD3
		BEND3
		MORF4L1
		CBLC
		INO80
		LDOC1
		PYCARD
		C6ORF62
		RAD51L1
		TMEM54
		RAC1
		S100P
		MATR3
		DOCK2
		FAM129A
		ASCC3
		LOC644029
		PAIP2
		CARD11
		CALML4
		MAPKAP1
		SPRR2D
		RPA2
		ACOX1
		AGPAT3
		CDX2
		IRF6
		IP6K3
		AASDHPPT
		PDE8A
		PTK7
		C16ORF35
		TSPAN33
		NOX4
		RNASEN
		TBX1
		MTMR10
		ASPHD1
		TADA2A
		VPS13A
		CSNK1A1
		DIS3
		SPATA7
		FOXK1
		THSD7B
		LOC100128007
		DPH5
		HLA-F
		HBXIP
		MEN1
		BDH1
		MYD88
		COMMD4
		HERPUD1
		HK2
		MDK
		RASSF2
		TNFAIP8
		LOC100134098
		LOC441208
		FABP5L2
		TCIRG1
		LOC100131261
		VCL
		FYTTD1
		BTBD7
		PDZK1
		ZNF443
		CXCL6
		CISD1
		LOC375295
		CLIP1
		HS.549668
		LAMA4
		CEPT1
		ETNK1
		ING1
		MED22
		CEBPB
		HMGA1
		CEP170L
		GABARAPL2
		UNC45A
		SDCCAG3
		HS.492187
		LOC441294
		FAM134B
		CHORDC1
		LOC93622
		LEP
		CCDC34
		LOC100128956
		SNX16
		EED
		TIAL1
		ZNF385B
		F2RL1
		ARL13B
		LOC100132499
		SLMO1
		CNOT1
		DAPP1
		EPHA4
		CMTM3
		LOC644242
		UBE2L6
		OSR2
		KLHL7
		HS.572073
		PTPN2
		PSMF1
		LOC650029
		OPA3
		OAS1
		CPVL
		TLK1
		GIYD2
		DOPEY2
		BCL7A
		NOTCH2
		SULF2
		LOC642398
		CCDC144A
		MAPK7
		RRAGC
		PARD6A
		CSRP2BP
		PARVB
		LAMA1
		GPR81
		COCH
		MGC10997
		FSD1
		TRIM47
		TP53AP1
		TRPV1
		DUSP3
		RNASEH2C
		SP110
		EEF1D
		ABCB9
		C20ORF24
		ATP6V0C
		RPL3
		TBX3
		RGS13
		CRSP9
		IL25
		CDAN1
		SYF2
		ATXN1L
		PTPN6
		MAP3K4
		CLCN3
		LRRC1
		DGKA
		NT5C3
		ZNF263
		CLK2P
		TACSTD1
		UBE2A
		LOC728657
		ZNF550
		LOC400446
		MIS12
		TCEAL3
		TAF1C
		SOCS5
		HS.120208
		MYCL1
		ZNF823
		LOC389342
		EMR4
		MAP2K3
		ATXN2L
		PRCC
		SERPINA5
		ABLIM1
		ZNF22
		SOX7
		MBNL2
		KLK6
		ID3
		LOC642236
		DUSP22
		DIAPH2
		RFWD2
		SCOC
		DPH3
		SLCO3A1
		FANCL
		TCF12
		PRRG4
		RNF144A
		PRKCD
		TAPBP
		LOC392437
		DYRK2
		LOC728689
		CCNL2
		ZFHX4
		SENP6
		VEGFC
		LARP1
		LOC148413
		PHC2
		RUVBL1
		C7ORF70
		STX7
		ATM
		ACSL5
		GART
		QPCT
		PRKAG2
		AIF1
		ARHGAP23
		KRT6A
		SIGMAR1
		PTBP1
		SNX7
		SF1
		LY6G5C
		SLC7A2
		RTN4
		DFFA
		ERP29
		C8ORF16
		LOC100130092
		S1PR1
		ERBB3
		ULBP2
		NR5A2
		LOC400879
		TNFRSF10B
		CDK5R1
		LOC389816
		C17ORF51
		DPP8
		HS.336511
		PAICS
		TOMM40L
		LOC644320
		ME3
		CDV3
		HIPK2
		HS.572889
		AKT1
		LOC646785
		HPS5
		F3
		LOC401019
		WNT5B
		LPAR1
		PCNXL2
		AZI1
		KIAA1026
		C10ORF58
		CSAG3
		RPS26P11
		INPP5A
		CMTM7
		ORC5L
		PNKD
		ATRN
		ZNF788
		KCNA7
		MMGT1
		HS.570107
		TRIM33
		TSC22D1
		SHC1
		INTS6
		LOC392288
		POLR1E
		SIPA1
		FABP5
		ALCAM
		LOC728098
		ADAM19
		DNMT3B
		MRPS12
		ACOT7
		HINT3
		LOC100129291
		PXMP2
		ZNF275
		SULT1A2
		CLDN9
		HS.554324
		LOC730107
		AMMECR1
		SEC13
		LOC100130967
		LOC100130818
		CRCP
		WIPI2
		REPS2
		VEZT
		NET1
		KCNMB3
		TPD52L1
		PCTK3
		ZWINT
		MRPL11
		COLEC12
		TNFRSF25
		MOCS1
		KIAA0363
		GPC4
		VAC14
		LOC100130776
		PRKCZ
		CCDC125
		TSC1
		C1ORF115
		TNFSF11
		SEC24B
		MYLK
		CICE
		WDR7
		TUSC3
		IARS
		ARFIP1
		CHRNB3
		BMP1
		PDE7A
		VARS
		MFAP2
		PSMD4
		SLC29A1
		MRPL27
		FBXW7
		RAB11FIP1
		PKIA
		KRT19
		SBDS
		LOC644617
		UBE2Z
		SLC39A8
		LOC728465
		LOC388621
		OTUB1
		PSMC5
		FNTA
		GTF2I
		RPL37A
		SPRY4
		NMU
		RGS17
		KPTN
		LOC100132859
		HAX1
		AKAP11
		GLB1
		DTX3
		SNORA57
		LOC100128781
		REPIN1
		STEAP1
		FAM178A
		MPZL2
		LOC642956
		MRI1
		GPX7
		WDR54
		ZDHHC16
		LOC648927
		BRMS1
		LOC647389
		MEF2A
		IL13RA2
		MTHFD2
		MTFMT
		LOC389791
		MAP6D1
		NSL1
		TUBA3D
		ZNF644
		BMP4
		PRDX5
		TXNDC5
		TES
		BHLHB9
		AADAT
		ATP5EP2
		COL13A1
		NXT1
		HMGA2
		GAR1
		ACSS2
		RLN2
		LOC653820
		MOXD1
		ITGB1BP1
		KRIT1
		LOC728253
		SP100
		EPB41L2
		PPM1B
		LOC100128822
		ZDHHC9
		SEPX1
		VGLL2
		HCG4
		WNT7A
		RPAIN
		EEF1E1
		METRNL
		PARP10
		SPINT1
		LOC729389
		MRPS27
		ELF2
		TGFA
		DKK1
		C15ORF44
		RNF40
		LOC169834
		LOC100132992
		DNAJB12
		MORN4
		CXCL5
		RGS10
		PLD3
		LOC649159
		C6ORF141
		LOC728006
		C20ORF117
		DDR1
		PMEPA1
		FBXO18
		C6ORF106
		HOXC6
		NMD3
		ZGPAT
		ZMYM6
		LOC606724
		S100A13
		MMP9
		LOC100131541
		DHRS2
		EXOC6
		XDH
		GCSH
		KCNG1
		CCNI
		AGPAT1
		SCYL3
		FAHD1
		LOC728969
		CCDC41
		FBXO11
		PSMG4
		AMY1B
		TPM3
		CBLL1
		COX8A
		POMT1
		BTF3
		FAM10A4
		HDHD2
		NBPF3
		SDHALP1
		IL18BP
		CXCR7
		TTC13
		TTC3
		IL23A
		SLC2A10
		TANK
		AQP11
		TALDO1
		RBMY2FP
		FAM129B
		NCK2
		DVL1
		C15ORF23
		PTP4A3
		LOC647786
		FAM96A
		MME
		CCDC14
		MFI2
		NR4A3
		TSTD1
		DUSP10
		STMN1
		GALNT10
		STK39
		RPS6KA2
		LOC644162
		RPE
		AXL
		CD276
		CSNK1E
		KRT72
		CCDC117
		UBN1
		CTNNA1
		CGI-96
		IL10
		LOC100128230
		LOC653110
		AFAP1
		RNF146
		WDR74
		GTF2IRD2B
		CLDN14
		TAGLN3
		LOC652466
		TIMM23
		OAS2
		TMEM50B
		NUDC
		LOC729513
		SCARA3
		HS.473191
		SLC16A4
		DUSP27
		LOC283481
		CMTM4
		RUNX2
		ADORA2B
		CABYR
		HS.572425
		CLEC2D
		LOC730455
		RASA1
		C17ORF81
		EXO1
		PIK3R1
		STAMBP
		CCDC16
		TCF20
		PITPNC1
		LBH
		SYNM
		SETD4
		TWIST1
		MRPS18B
		ARL5A
		ITGB5
		SMAD6
		RBMS1
		EIF6
		LOC644464
		HCP5
		THOC5
		NGRN
		MECP2
		PSMA1
		ACACA
		LNPEP
		FBXO22
		THAP11
		LOC642513
		MAGEE1
		TNFRSF11B
		DEM1
		CS
		ARL4C
		LOC645644
		FAR2
		COL6A2
		LOC388160
		RPAP3
		ITGB4BP
		BOLA2
		ABCC3
		CPN1
		SEZ6L2
		CCBL2
		KLF12
		PRPSAP1
		C11ORF41
		KEAP1
		LOC100129657
		DFNA5
		C10ORF59
		CCRL2
		PRDX3
		FAM86A
		LOC200030
		HS.123119
		DUSP6
		INA
		NQO1
		SPNS2
		FOXL2
		PIGN
		GALNTL1
		SNHG8
		NFATC2IP
		COL17A1
		KIF24
		LYNX1
		WDR5
		SFRS18
		PARP3
		LOC643873
		LOC23117
		CTPS2
		NDUFA9
		LOC644006
		HS.550042
		LOC650465
		DTWD1
		KRT6B
		CTSH
		TTC9C
		SEPN1
		CUTA
		SFRP1
		SUOX
		SMAD5
		CDK10
		HLX
		PUM1
		H2AFY
		LOC728919
		ARRB2
		CERK
		NASP
		GNAS
		LOC653270
		SLC6A15
		SON
		MGC57359
		LOC642804
		DLGAP4
		PALM2
		NTAN1
		CBFA2T2
		NGDN
		RBM9
		SPRR2F
		ITGB1
		DSE
		NAV2
		LOC644191
		CNOT7
		RUNX1T1
		PPM1E
		MORN5
		LFNG
		RPS26L
		COL8A1
		SPAST
		TEAD4
		HAS3
		PPIL3
		LOC341965
		MIR497
		TMEM203
		SRPX2
		ST6GALNAC4
		LRRC37B
		FEZ1
		SLC35E1
		MGC35361
		LOC650796
		RNF160
		SRC
		CRMP1
		DDX59
		KTELC1
		SP3
		GOSR2
		FLRT3
		ZNF32
		AGAP3
		PRKCQ
		TPM2
		STXBP1
		C6ORF114
		SP8
		TGFB1I1
		UBE3A
		UBTF
		CLTB
		GAS6
		LOC728554
		ATP6V0E2
		NUDT21
		ERC1
		THNSL2
		C1QTNF1
		EYA2
		ZNF652
		SPTLC1
		CYTSA
		NRP1
		NLRP3
		UBE2E3
		CCDC50
		HS.559604
		DICER1
		SULT1A4
		CYFIP1
		MOSPD2
		BDNF
		TFCP2L1
		LOC347376
		FLNC
		DHX40
		DLL1
		MYL6
		LOC649143
		CENPO
		PBRM1
		LOC647247
		LUC7L
		ANO1
		FHL2
		CSF3
		GPATCH4
		KIAA1147
		PDPK1
		KYNU
		RAD51C
		GNA15
		HS.278303
		ACCN2
		CTH
		KLC3
		OCIAD1
		TMEM80
		ALDOA
		ATF4
		CROP
		PDCD10
		MX2
		SIAH1
		BTF3L4
		THOC3
		PHACTR4
		OGT
		PNRC2
		REXO1L2P
		CYP20A1
		DLK2
		SPG21
		DLX5
		HOXB6
		SORD
		WDHD1
		STAP2
		LOC653924
		KIAA1618
		USP48
		PPP2R2D
		EDARADD
		CDH23
		HS.572444
		DYRK1A
		NCAPH2
		AUP1
		LOC641765
		CUL4A
		PDLIM3
		RNF149
		CDCP1
		MIR425
		NNT
		L3MBTL3
		IGFBP4
		UBR7
		CYCSL1
		CAST
		LOC646144
		ATP6V0E1
		TRIB2
		FLJ40722
		DNAJC10
		CD44
		KCNMA1
		TOP1MT
		CCDC28B
		KCNK6
		SLC25A14
		HS.582113
		TMEM19
		LOC643283
		NOL8
		GAGE1
		TRAF5
		HSPD1
		N4BP2L2
		CDIPT
		VPS25
		MUTYH
		LOC729964
		NFYA
		NMNAT2
		RBBP6
		GGN
		SOX9
		SLC4A5
		UPK3B
		IRF7
		ATP5H
		PHGDH
		GPS1
		LOC647150
		MGC57346
		TAOK2
		SLC16A2
		LOC100128060
		LOC284890
		ZNF681
		LOC100134584
		LOC642346
		SNRNP48
		MRPS18C
		SP4
		ZC3H11B
		LOC148430
		LOC441876
		GPR110
		MKKS
		ADCY1
		LOC729859
		PLXNA4
		DEPDC1
		KIAA1429
		ZNF695
		ADRBK1
		CHMP2A
		LOC731486
		SPRY1
		SNX5
		RGS11
		UBOX5
		TAZ
		CRELD1
		LOC440093
		GPR56
		OGFOD1
		PLEKHA2
		PDE4DIP
		LOC728844
		MGC40489
		JMJD8
		MLKL
		KLHL5
		BOLA3
		ST6GAL1
		SKIL
		GAK
		FBXO6
		DOCK7
		DNAJB14
		ROR1
		RFC5
		PHF11
		KCNS3
		HS.547601
		MAEA
		ZNF519
		METTL1
		MACF1
		TPP2
		EXT2
		PDLIM7
		MSL3
		YOD1
		DBNDD2
		ANKRD35
		LOC100129002
		CCM2
		MAPK9
		BEXL1
		TRIM37
		GRHL2
		SLC43A3
		VANGL2
		ALG13
		SH3GL3
		DBT
		MRFAP1L1
		HOXA10
		AGK
		PKP4
		GSDMC
		COL4A3BP
		LOC100132863
		DHX37
		RUNDC2C
		GNL1
		ARMC10
		LOC100129237
		LOC649946
		LOC646330
		BCL7C
		ZP3
		LOC653884
		DHX9
		DUSP11
		LOC100134256
		LOC100133232
		GRB10
		C17ORF58
		LOC100129673
		MGAT2
		NOP56
		NOL12
		SASS6
		FLJ39632
		DHPS
		IL1R2
		SLC9A6
		PLAG1
		HS.156773
		SPRR2A
		CST6
		TOP2A
		CNTNAP2
		ARMCX6
		PKN1
		SFRS12
		MLLT10
		SLC30A5
		MRPL21
		GLIPR1
		LRDD
		NFX1
		SYNJ1
		PTCD1
		PON2
		ENC1
		GTF3C6
		COL6A1
		AKR1C3
		FBXL18
		PRNPIP
		ZNF266
		FOXO3
		CTHRC1
		TNFSF14
		SH2D5
		DAPK1
		MRPL45
		RPS5
		MTMR1
		GGT2
		HISPPD2A
		CLTA
		OGDH
		PPP3CA
		FOXA2
		SLCO2A1
		TMEM98
		LAMP3
		CDS1
		LOC648695
		NBPF8
		PSMC3IP
		PPEF2
		ABI2
		SLAIN1
		LOC651198
		AKR7A3
		CDH24
		LOC439949
		LOC100131713
		ANO9
		FYN
		BEX2
		SPAG9
		RAD54B
		LOC541469
		ANAPC1
		LOC100130932
		APTX
		NFATC3
		SCARF2
		LOC727984
		ZNF74
		HYAL2
		PRDM1
		PPP2R4
		NUCKS1
		EIF2B4
		LOC390557
		IL17RD
		HOXA2
		BAT1
		DKK3
		C1ORF71
		MUC6
		GLMN
		PDLIM4
		LOC653203
		NAAA
		TRNT1
		HS.569953
		KCMF1
		PJA1
		ARSD
		ALG8
		TFAP2A
		MLL5
		LOC644684
		TGIF1
		ICA1
		LOC728128
		GTPBP6
		SRA1
		CPNE1
		NDRG4
		RORC
		SULT2B1
		PLEKHA6
		RPS9
		HEATR2
		LOC389404
		CCL13
		LOC390705
		ZNF189
		RFX5
		ZBTB34
		PROM2
		TGM2
		SLC23A2
		MANBAL
		GGA3
		SLC16A12
		CACHD1
		SRI
		REC8
		TSC22D3
		LOC100131609
		SMC4
		SCAND1
		PFN2
		RCOR2
		WT1
		TXNRD2
		FBLN1
		MRRF
		CCR2
		SH3KBP1
		RGS7
		SGTB
		LOC727761
		SRGAP2
		SERF1B
		GNG4
		AGPAT4
		TPM1
		SFRS2IP
		TXNL1
		CYYR1
		MANEAL
		COX19
		ILF3
		LARP6
		GUSBL1
		LOC653381
		ALDH3B2
		SMYD2
		EIF4G1
		RANBP3
		TPD52
		TAGLN
		KCNK2
		C7ORF55
		FAM35A
		TNC
		MAPKAPK5
		AFAP1L2
		ZNF428
		HOMER2
		C1ORF116
		GSPT2
		MXI1
		LOC730029
		IGDCC4
		FNDC3A
		KHDRBS3
		MTRF1L
		CSAD
		LOC728012
		HS.524845
		NCKIPSD
		SDHC
		UBTD2
		GPR175
		AKAP13
		TMEM55A
		RTKN
		LOC728139
		CLUAP1
		LGALS8
		MUTED
		CYTSB
		C7ORF28A
		KCNJ15
		ONECUT2
		FLJ41941
		LOC441253
		SPRR2E
		SEMA4C
		ARMCX2
		PSMB9
		CTSC
5637_rs7242 UROtsa_rs7242 UROtsa_rs1050813	378	MIR630
		HS.570330
		LOC643346
		LOC652875
		LOC643702
		HUS1
		LOC100132394
		THEG
		LOC649679
		EIF4E
		CEP63
		LOC647197
		LOC643972
		LOC149478
		HS.563340
		LRRIQ1
		KIAA1751
		MAPK8IP1
		SLC44A4
		YY1AP1
		HS.276854
		HS.547587
		LOC100130905
		HS.582988
		LOC644075
		LOC155100
		A26C3
		FGA
		LOC222967
		ASB17
		HS.573131
		HS.317248
		NBPF15
		TRAPPC6B
		LOC642597
		NOC4L
		LOC100133598
		LOC100131403
		RIBC1
		DNM1
		LOC442240
		SLC7A3
		SLC22A16
		MMP23B
		FHIT
		LOC729259
		CHST2
		TNFRSF8
		C8ORF48
		C10ORF53
		HS.544017
		HS.568618
		KRTAP2-1
		C1ORF170
		ASPG
		LOC646300
		MRGPRE
		TAF3
		C17ORF77
		PDZD11
		LOC388122
		LOC121792
		LOC100129354
		ASAH2C
		LOC645722
		LOC642268
		FAM75C1
		LOC730376
		LOC645527
		C16ORF88
		CNRIP1
		LOC653163
		ZC3HAV1L
		LOC729681
		HS.559654
		RETNLB
		LOC90586
		LOC642771
		IKZF2
		TAF1A
		LOC100133177
		SCARNA21
		C12ORF64
		C8ORF45
		LOC100133669
		HS.579949
		C6ORF1
		SEC22A
		PA2G4P4
		LOC100131643
		ADAM32
		HS.541685
		KRTAP24-1
		LOC646365
		TENC1
		NDRG2
		HS.544132
		ZNF136
		C21ORF91
		MIR361
		LOC643206
		LOC643273
		LOC652874
		GIPC2
		PRPS1L1
		TRIM6-TRIM34
		POLH
		NLRP8
		HS.130562
		LOC728416
		ALAS2
		LOC100132663
		KIF26B
		OTOR
		LOC731789
		KIAA1530
		FLJ13611
		SLC22A1
		HSPA6
		HS.534997
		LRRC15
		C20ORF165
		TMEM106A
		HS.567184
		ZSCAN1
		LOC653293
		ZNF580
		ICAM4
		HIST1H2BG
		LOC645241
		HS.141748
		CYP4Z2P
		TSNARE1
		WNK3
		SUDS3
		GP5
		HS.563969
		LOC100128683
		LOC441811
		LOC100128816
		C11ORF63
		MLC1
		LOC642645
		HTR7
		KIAA1383
		HS.513108
		MEIS2
		HS.518527
		ABHD2
		POGZ
		FOXB1
		RASSF5
		SYTL1
		LOC653539
		MIR29B1
		AKR1C4
		LOC728790
		HS.382212
		ADRA1D
		ABCC9
		SMAD2
		LOC100133422
		LOC652894
		RBM39
		LOC647993
		MMP10
		LOC100133563
		SAMD3
		CASP10
		LOC100133991
		PACRGL
		LOC391730
		FRAT1
		MIR300
		RBMY1A3P
		LOC653086
		MIR15B
		C11ORF49
		LOC644642
		LOC653053
		HS.540516
		CABP2
		LOC653321
		LOC644714
		LOC158730
		SCARNA27
		RFPL1
		CAPS
		DMC1
		PTPN5
		CYP1A1
		LOC440349
		LOC645355
		C6ORF132
		PSG4
		LOC100128519
		HS.520328
		KALRN
		LOC730990
		LOC652887
		AMPD3
		HS.244140
		SCARNA22
		UNCX
		C7ORF29
		FUSSEL18
		LOC257054
		DNAJC5B
		SNORA71C
		ATPBD4
		LOC100130519
		ZNF682
		CGB1
		ST6GALNAC1
		CHST8
		HOXC13
		LOC653489
		LOC442060
		INSC
		PIGV
		HS.544814
		LOC643509
		EDNRB
		LOC100129186
		LOC645162
		PRPF40A
		NPY5R
		HGD
		LOC653184
		C1D
		C9ORF144
		GPRASP1
		CATSPER2
		MIR572
		AMAC1L2
		CLIC6
		HS.544828
		LOC100130921
		LOC284441
		GATA6
		PNOC
		LOC161527
		LOC644326
		HS.555181
		ZNF827
		LOC100131532
		PEX26
		LOC731631
		HS.130155
		NEK10
		ZNF608
		LOC285804
		HS.569199
		LOC100008589
		LOC391169
		LOC730226
		VRK3
		C10ORF4
		MID2
		CDYL
		HS.544242
		RC3H1
		LOC642381
		LOC651175
		LOC649044
		LOC100130855
		LOC100129165
		LOC646106
		LOC100131452
		SLC25A25
		P2RY13
		ACRV1
		LOC100130734
		C6ORF218
		C11ORF34
		LOC283788
		LOC391132
		DUSP15
		RCADH5
		HS.148844
		CTAGE5
		CACNG5
		C8ORF49
		FOXD4L1
		CAPN12
		EPGN
		PCDHGA4
		DKFZP434N035
		HS.583132
		FUT3
		PLAC1
		LOC729373
		LSR
		PLA2G16
		LOC650651
		LOC728772
		TIGD3
		LOC643856
		CYP4B1
		ABCA13
		HDLBP
		GNG8
		C10ORF11
		CLRN1
		SPAG16
		HS.293427
		RPL7L1
		LOC644189
		MPPED1
		LOC388553
		CUGBP2
		FLJ40606
		LOC100131081
		NFIC
		LOC347411
		EXOSC8
		LOC652618
		FOXD4L2
		LOC100131360
		TTF1
		LOC731542
		C21ORF24
		LOC728308
		USP22
		HS.382845
		LOC641994
		GPC6
		MBOAT2
		BTN2A1
		LMAN1L
		LOC400954
		LOC648568
		LOC100133080
		COL23A1
		ZNF177
		PCDH11X
		MIR1229
		HS.555574
		ZDBF2
		ZNF430
		C7ORF61
		LOC390683
		EYA3
		XIST
		GPX8
		LOC728946
		GFRA1
		COL8A2
		LOC440895
		HS.492066
		LOC100130827
		LOC389901
		LOC389765
		TFDP3
		LOC643435
		HS.545009
		LOC100131726
		ZNF138
		LOC643797
		LTB
		BEST1
		LOC649864
		LOC728557
		KIAA1875
		HS.438905
		SOCS7
		LOC730060
		PRR15
		HS.440548
		LOC100134444
		LOC100131850
		HS.512276
		CAPN5
		LOC131185
		ERCC-00136
		CST2
		LOC648362
		MIR639
5637_rs7242 5637_rs1050813 UROtsa_rs7242	585	PDCL3
		LOC653421
		BRIX1
		LOC729926
		DIMT1L
		LARP7
		ROR2
		NDUFS4
		UQCRC1
		DCUN1D5
		C16ORF72
		POLD2
		C1QBP
		THOC7
		SQLE
		GLIPR2
		ALG9
		SLC35A1
		CRLF3
		BANF1
		RB1CC1
		LPAR3
		LOC643272
		PRMT5
		LCLAT1
		TACC1
		KLHDC3
		ZNRF3
		LOC100131187
		TXNRD1
		TNRC15
		SRPX
		NOL7
		C18ORF55
		MRPS21
		HRSP12
		KTN1
		SAFB
		NFKBIL2
		CCDC51
		KLF3
		NUP93
		COMMD7
		LOC642469
		ATP2C1
		CDC26
		LOC648210
		MRPL35
		MRPL50
		GTF3C2
		C8ORF55
		RPL36AL
		LOC440926
		PTPN1
		IFITM3
		SDCBP
		LSM5
		NUP160
		FAM116A
		IQGAP1
		PUS7
		TUBB6
		DPH2
		DIAPH1
		MRPL49
		NOMO2
		C6ORF125
		C7ORF27
		MATN2
		HERC4
		CKAP5
		DIS3L
		HDGF
		TMEM2
		LOC203547
		PGD
		DHX36
		CDKAL1
		ZNHIT6
		PLCE1
		PTPLA
		G3BP1
		RPPH1
		KPNA2
		GOLGA3
		POLE3
		WBSCR22
		AFAP1L1
		CST3
		CD99
		NUAK1
		CTSB
		PTGS2
		HS.570988
		NUF2
		EEF1A2
		H3F3A
		SEC16A
		LOC729298
		PUM2
		MAPK1
		PSMB4
		MAPRE2
		SMG7
		ZCCHC11
		SLC35F2
		RPS6P1
		LOC100130919
		ASB9
		C2ORF49
		KRT75
		DONSON
		SLC30A9
		LYRM1
		SNRNP70
		ZC3H7A
		NUP153
		MCM3
		C10ORF61
		CSK
		LOC729992
		ACO1
		PLEKHA1
		LOC100132742
		SNUPN
		MIR185
		SS18
		DAB2
		HS.576274
		MLLT6
		REEP5
		GRN
		PTS
		CMBL
		C7ORF23
		LOC441506
		HTRA2
		CRK
		PDS5A
		LSM1
		C10ORF2
		DNCL1
		MKI67IP
		NUDT5
		KHDC1
		SNX17
		ERAL1
		LOC100131787
		MFF
		COPS4
		LOC644101
		C12ORF32
		DNAJA3
		HCFC1
		KIF14
		COQ10B
		MTMR12
		OPN3
		TCF19
		CPA4
		MELK
		PODXL
		SUPT16H
		UPF1
		CDC40
		TOR1A
		EIF2AK2
		PAM
		WDR70
		C3ORF75
		RAD23A
		SHQ1
		NAT5
		EIF4ENIF1
		TNFRSF21
		LOC100129585
		GPAM
		NCK1
		PAK4
		LOC389223
		SLC27A2
		CALD1
		LOC100129424
		RYK
		RECQL
		KIF11
		SH3GLB1
		RUNX1
		C17ORF85
		AKR7A2
		AOF2
		PLOD3
		SPCS1
		EHBP1
		RAB17
		TMEM154
		NUP210
		YWHAB
		MRPL3
		LOC146517
		AHSA1
		TFDP1
		LOC100130707
		SNORA8
		DCTPP1
		MAGEA6
		PSMB5
		QTRTD1
		RRP12
		PPAT
		NIPA1
		C22ORF30
		DDX58
		SERBP1
		STK38
		SLC16A10
		TH1L
		ALDH3A2
		LOC100133800
		SORT1
		KRT17P3
		C1ORF203
		RAB5B
		CNOT6
		C5ORF15
		CSRP1
		ASAP1
		LOC134997
		STK3
		BAG3
		PRKDC
		SURF4
		BCAS2
		AADACL1
		APEX1
		TMEM5
		BIRC2
		TPST2
		ERGIC3
		CREB3L4
		UBE2T
		SGK
		NAP1L1
		PTDSS1
		SKP1A
		RHOU
		ZC3HC1
		RBM14
		CEP55
		BLCAP
		POLE4
		SAA1
		EIF2C2
		TIPRL
		CPS1
		PREPL
		RABGAP1L
		TRAPPC3
		GINS2
		CYP1B1
		VAMP8
		TAF1B
		EVI1
		USP24
		ASF1B
		LITAF
		OAS3
		ODAM
		KIF20B
		RBBP4
		CCDC86
		KBTBD11
		ISG20L2
		UTP14A
		BEX4
		BAT3
		RAN
		UFC1
		NSUN2
[truncated: 29,870 more rows]
