# Supplementary material for: Association of SNPs in the PAI1 Gene with Disease Recurrence and Clinical Outcome in Bladder Cancer
Source: Int J Mol Sci. 2023 Mar 3;24(5):4943. doi: 10.3390/ijms24054943 (PMC10003630; doi:10.3390/ijms24054943)
Supplement: Supplementary file 1 [file ijms-24-04943-s001.zip › Supplemental Table 11.xlsx]

## Sheet: pantherChart
Table S11. The list of Pathways for DEGs C125E01 vs WT between 5637 and UROtsa.
	Pathway	Gene	%total	%hits
3	Gonadotropin-releasing hormone receptor pathway (P06664)	10	0.025	0.048
10	CCKR signaling map (P06959)	9	0.023	0.043
12	p53 pathway (P00059)	9	0.023	0.043
40	Inflammation mediated by chemokine and cytokine signaling pathway (P00031)	9	0.023	0.043
4	Angiogenesis (P00005)	8	0.02	0.039
2	Apoptosis signaling pathway (P00006)	7	0.018	0.034
24	PDGF signaling pathway (P00047)	7	0.018	0.034
37	Integrin signalling pathway (P00034)	6	0.015	0.029
13	Wnt signaling pathway (P00057)	5	0.013	0.024
50	Heterotrimeric G-protein signaling pathway-Gi alpha and Gs alpha mediated pathway (P00026)	5	0.013	0.024
60	FGF signaling pathway (P00021)	5	0.013	0.024
18	T cell activation (P00053)	4	0.01	0.019
19	TGF-beta signaling pathway (P00052)	4	0.01	0.019
25	Oxidative stress response (P00046)	4	0.01	0.019
49	p38 MAPK pathway (P05918)	4	0.01	0.019
77	B cell activation (P00010)	4	0.01	0.019
11	Ubiquitin proteasome pathway (P00060)	3	0.008	0.014
16	Transcription regulation by bZIP transcription factor (P00055)	3	0.008	0.014
35	Interleukin signaling pathway (P00036)	3	0.008	0.014
36	Interferon-gamma signaling pathway (P00035)	3	0.008	0.014
44	Ras Pathway (P04393)	3	0.008	0.014
46	Huntington disease (P00029)	3	0.008	0.014
59	Enkephalin release (P05913)	3	0.008	0.014
69	EGF receptor signaling pathway (P00018)	3	0.008	0.014
5	Alzheimer disease-presenilin pathway (P00004)	2	0.005	0.01
8	N-acetylglucosamine metabolism (P02756)	2	0.005	0.01
15	VEGF signaling pathway (P00056)	2	0.005	0.01
17	Toll receptor signaling pathway (P00054)	2	0.005	0.01
21	Parkinson disease (P00049)	2	0.005	0.01
22	De novo purine biosynthesis (P02738)	2	0.005	0.01
23	PI3 kinase pathway (P00048)	2	0.005	0.01
28	Muscarinic acetylcholine receptor 2 and 4 signaling pathway (P00043)	2	0.005	0.01
31	Metabotropic glutamate receptor group II pathway (P00040)	2	0.005	0.01
38	Insulin/IGF pathway-mitogen activated protein kinase kinase/MAP kinase cascade (P00032)	2	0.005	0.01
39	p53 pathway feedback loops 2 (P04398)	2	0.005	0.01
42	Hypoxia response via HIF activation (P00030)	2	0.005	0.01
48	Heterotrimeric G-protein signaling pathway-Gq alpha and Go alpha mediated pathway (P00027)	2	0.005	0.01
54	Glycolysis (P00024)	2	0.005	0.01
61	Dopamine receptor mediated signaling pathway (P05912)	2	0.005	0.01
62	FAS signaling pathway (P00020)	2	0.005	0.01
63	Histamine H2 receptor mediated signaling pathway (P04386)	2	0.005	0.01
65	Histamine H1 receptor mediated signaling pathway (P04385)	2	0.005	0.01
68	Endothelin signaling pathway (P00019)	2	0.005	0.01
70	DNA replication (P00017)	2	0.005	0.01
71	Cytoskeletal regulation by Rho GTPase (P00016)	2	0.005	0.01
75	Blood coagulation (P00011)	2	0.005	0.01
76	Beta2 adrenergic receptor signaling pathway (P04378)	2	0.005	0.01
78	Beta1 adrenergic receptor signaling pathway (P04377)	2	0.005	0.01
81	5HT1 type receptor mediated signaling pathway (P04373)	2	0.005	0.01
1	Axon guidance mediated by netrin (P00009)	1	0.003	0.005
6	O-antigen biosynthesis (P02757)	1	0.003	0.005
7	Alzheimer disease-amyloid secretase pathway (P00003)	1	0.003	0.005
9	Methionine biosynthesis (P02753)	1	0.003	0.005
14	Heme biosynthesis (P02746)	1	0.003	0.005
20	Plasminogen activating cascade (P00050)	1	0.003	0.005
26	Notch signaling pathway (P00045)	1	0.003	0.005
27	Nicotinic acetylcholine receptor signaling pathway (P00044)	1	0.003	0.005
29	Muscarinic acetylcholine receptor 1 and 3 signaling pathway (P00042)	1	0.003	0.005
30	Asparagine and aspartate biosynthesis (P02730)	1	0.003	0.005
32	GABA-B receptor II signaling (P05731)	1	0.003	0.005
33	Arginine biosynthesis (P02728)	1	0.003	0.005
34	Metabotropic glutamate receptor group III pathway (P00039)	1	0.003	0.005
41	p53 pathway by glucose deprivation (P04397)	1	0.003	0.005
43	Thyrotropin-releasing hormone receptor signaling pathway (P04394)	1	0.003	0.005
45	Oxytocin receptor mediated signaling pathway (P04391)	1	0.003	0.005
47	Heterotrimeric G-protein signaling pathway-rod outer segment phototransduction (P00028)	1	0.003	0.005
51	Opioid proopiomelanocortin pathway (P05917)	1	0.003	0.005
52	Hedgehog signaling pathway (P00025)	1	0.003	0.005
53	Opioid prodynorphin pathway (P05916)	1	0.003	0.005
55	Opioid proenkephalin pathway (P05915)	1	0.003	0.005
56	General transcription regulation (P00023)	1	0.003	0.005
57	General transcription by RNA polymerase I (P00022)	1	0.003	0.005
58	Nicotine pharmacodynamics pathway (P06587)	1	0.003	0.005
64	Pyruvate metabolism (P02772)	1	0.003	0.005
66	Gamma-aminobutyric acid synthesis (P04384)	1	0.003	0.005
67	Cortocotropin releasing factor receptor signaling pathway (P04380)	1	0.003	0.005
72	Cell cycle (P00013)	1	0.003	0.005
73	Cadherin signaling pathway (P00012)	1	0.003	0.005
74	Beta3 adrenergic receptor signaling pathway (P04379)	1	0.003	0.005
79	5HT4 type receptor mediated signaling pathway (P04376)	1	0.003	0.005
80	5HT2 type receptor mediated signaling pathway (P04374)	1	0.003	0.005
82	5-Hydroxytryptamine degredation (P04372)	1	0.003	0.005
