# Supplementary material for: Association of SNPs in the PAI1 Gene with Disease Recurrence and Clinical Outcome in Bladder Cancer
Source: Int J Mol Sci. 2023 Mar 3;24(5):4943. doi: 10.3390/ijms24054943 (PMC10003630; doi:10.3390/ijms24054943)
Supplement: Supplementary file 1 [file ijms-24-04943-s001.zip › Supplemental Table 12.xlsx]

## Sheet: Panther_WT_vs_760
Table S12. The list of Pathways for DEGs WT vs rs7242 between 5637 and UROtsa.
	Pathway	Gene	%total	%hits
58	Inflammation mediated by chemokine and cytokine signaling pathway (P00031)	38	0.021	0.043
52	Integrin signalling pathway (P00034)	37	0.02	0.042
5	Gonadotropin-releasing hormone receptor pathway (P06664)	34	0.019	0.039
14	CCKR signaling map (P06959)	33	0.018	0.038
17	Wnt signaling pathway (P00057)	32	0.017	0.036
6	Angiogenesis (P00005)	29	0.016	0.033
66	Huntington disease (P00029)	26	0.014	0.03
92	EGF receptor signaling pathway (P00018)	25	0.014	0.028
4	Apoptosis signaling pathway (P00006)	22	0.012	0.025
70	Heterotrimeric G-protein signaling pathway-Gi alpha and Gs alpha mediated pathway (P00026)	20	0.011	0.023
29	Parkinson disease (P00049)	19	0.01	0.022
68	Heterotrimeric G-protein signaling pathway-Gq alpha and Go alpha mediated pathway (P00027)	19	0.01	0.022
82	FGF signaling pathway (P00021)	18	0.01	0.02
24	T cell activation (P00053)	17	0.009	0.019
32	PDGF signaling pathway (P00047)	17	0.009	0.019
64	Ras Pathway (P04393)	15	0.008	0.017
99	Cadherin signaling pathway (P00012)	15	0.008	0.017
15	Ubiquitin proteasome pathway (P00060)	14	0.008	0.016
49	Interleukin signaling pathway (P00036)	14	0.008	0.016
8	Alzheimer disease-presenilin pathway (P00004)	13	0.007	0.015
94	Cytoskeletal regulation by Rho GTPase (P00016)	12	0.007	0.014
22	Toll receptor signaling pathway (P00054)	11	0.006	0.013
34	Oxidative stress response (P00046)	11	0.006	0.013
91	Endothelin signaling pathway (P00019)	11	0.006	0.013
103	B cell activation (P00010)	11	0.006	0.013
16	p53 pathway (P00059)	10	0.005	0.011
19	VEGF signaling pathway (P00056)	10	0.005	0.011
38	Muscarinic acetylcholine receptor 1 and 3 signaling pathway (P00042)	10	0.005	0.011
20	Transcription regulation by bZIP transcription factor (P00055)	9	0.005	0.01
25	TGF-beta signaling pathway (P00052)	9	0.005	0.01
62	Thyrotropin-releasing hormone receptor signaling pathway (P04394)	9	0.005	0.01
65	Oxytocin receptor mediated signaling pathway (P04391)	9	0.005	0.01
93	DNA replication (P00017)	9	0.005	0.01
108	5HT2 type receptor mediated signaling pathway (P04374)	9	0.005	0.01
9	Alzheimer disease-amyloid secretase pathway (P00003)	8	0.004	0.009
85	Angiotensin II-stimulated signaling through G proteins and beta-arrestin (P05911)	8	0.004	0.009
88	Histamine H1 receptor mediated signaling pathway (P04385)	8	0.004	0.009
31	PI3 kinase pathway (P00048)	7	0.004	0.008
50	Interferon-gamma signaling pathway (P00035)	7	0.004	0.008
69	p38 MAPK pathway (P05918)	7	0.004	0.008
80	General transcription by RNA polymerase I (P00022)	7	0.004	0.008
1	Axon guidance mediated by netrin (P00009)	6	0.003	0.007
40	Metabotropic glutamate receptor group II pathway (P00040)	6	0.003	0.007
46	Metabotropic glutamate receptor group III pathway (P00039)	6	0.003	0.007
55	Insulin/IGF pathway-protein kinase B signaling cascade (P00033)	6	0.003	0.007
57	p53 pathway feedback loops 2 (P04398)	6	0.003	0.007
74	Opioid prodynorphin pathway (P05916)	6	0.003	0.007
81	Enkephalin release (P05913)	6	0.003	0.007
83	Dopamine receptor mediated signaling pathway (P05912)	6	0.003	0.007
84	FAS signaling pathway (P00020)	6	0.003	0.007
90	Cortocotropin releasing factor receptor signaling pathway (P04380)	6	0.003	0.007
100	Beta3 adrenergic receptor signaling pathway (P04379)	6	0.003	0.007
102	Beta2 adrenergic receptor signaling pathway (P04378)	6	0.003	0.007
104	Beta1 adrenergic receptor signaling pathway (P04377)	6	0.003	0.007
105	5HT4 type receptor mediated signaling pathway (P04376)	6	0.003	0.007
37	Muscarinic acetylcholine receptor 2 and 4 signaling pathway (P00043)	5	0.003	0.006
42	GABA-B receptor II signaling (P05731)	5	0.003	0.006
56	Insulin/IGF pathway-mitogen activated protein kinase kinase/MAP kinase cascade (P00032)	5	0.003	0.006
71	Opioid proopiomelanocortin pathway (P05917)	5	0.003	0.006
76	Opioid proenkephalin pathway (P05915)	5	0.003	0.006
77	General transcription regulation (P00023)	5	0.003	0.006
86	Histamine H2 receptor mediated signaling pathway (P04386)	5	0.003	0.006
2	Axon guidance mediated by Slit/Robo (P00008)	4	0.002	0.005
3	Axon guidance mediated by semaphorins (P00007)	4	0.002	0.005
35	Notch signaling pathway (P00045)	4	0.002	0.005
43	Endogenous cannabinoid signaling (P05730)	4	0.002	0.005
60	Hypoxia response via HIF activation (P00030)	4	0.002	0.005
61	Vasopressin synthesis (P04395)	4	0.002	0.005
67	Heterotrimeric G-protein signaling pathway-rod outer segment phototransduction (P00028)	4	0.002	0.005
75	Glycolysis (P00024)	4	0.002	0.005
79	Nicotine pharmacodynamics pathway (P06587)	4	0.002	0.005
101	Blood coagulation (P00011)	4	0.002	0.005
106	Pentose phosphate pathway (P02762)	4	0.002	0.005
109	5HT1 type receptor mediated signaling pathway (P04373)	4	0.002	0.005
10	Alpha adrenergic receptor signaling pathway (P00002)	3	0.002	0.003
11	Adrenaline and noradrenaline biosynthesis (P00001)	3	0.002	0.003
21	Fructose galactose metabolism (P02744)	3	0.002	0.003
26	TCA cycle (P00051)	3	0.002	0.003
30	De novo purine biosynthesis (P02738)	3	0.002	0.003
33	Coenzyme A biosynthesis (P02736)	3	0.002	0.003
36	Nicotinic acetylcholine receptor signaling pathway (P00044)	3	0.002	0.003
48	Ionotropic glutamate receptor pathway (P00037)	3	0.002	0.003
12	Methylcitrate cycle (P02754)	2	0.001	0.002
18	Heme biosynthesis (P02746)	2	0.001	0.002
27	De novo pyrimidine ribonucleotides biosythesis (P02740)	2	0.001	0.002
28	Plasminogen activating cascade (P00050)	2	0.001	0.002
45	Arginine biosynthesis (P02728)	2	0.001	0.002
59	p53 pathway by glucose deprivation (P04397)	2	0.001	0.002
72	Hedgehog signaling pathway (P00025)	2	0.001	0.002
73	Sulfate assimilation (P02778)	2	0.001	0.002
95	Purine metabolism (P02769)	2	0.001	0.002
96	Circadian clock system (P00015)	2	0.001	0.002
98	Cell cycle (P00013)	2	0.001	0.002
110	5-Hydroxytryptamine degredation (P04372)	2	0.001	0.002
7	Ornithine degradation (P02758)	1	0.001	0.001
13	Methionine biosynthesis (P02753)	1	0.001	0.001
23	Formyltetrahydrofolate biosynthesis (P02743)	1	0.001	0.001
39	Metabotropic glutamate receptor group I pathway (P00041)	1	0.001	0.001
41	Synaptic vesicle trafficking (P05734)	1	0.001	0.001
44	Ascorbate degradation (P02729)	1	0.001	0.001
47	JAK/STAT signaling pathway (P00038)	1	0.001	0.001
51	Adenine and hypoxanthine salvage pathway (P02723)	1	0.001	0.001
53	Vitamin B6 metabolism (P02787)	1	0.001	0.001
54	Acetate utilization (P02722)	1	0.001	0.001
63	Threonine biosynthesis (P02781)	1	0.001	0.001
78	Serine glycine biosynthesis (P02776)	1	0.001	0.001
87	Pyruvate metabolism (P02772)	1	0.001	0.001
89	Gamma-aminobutyric acid synthesis (P04384)	1	0.001	0.001
97	Cholesterol biosynthesis (P00014)	1	0.001	0.001
107	5HT3 type receptor mediated signaling pathway (P04375)	1	0.001	0.001
