# Supplementary material for: Association of SNPs in the PAI1 Gene with Disease Recurrence and Clinical Outcome in Bladder Cancer
Source: Int J Mol Sci. 2023 Mar 3;24(5):4943. doi: 10.3390/ijms24054943 (PMC10003630; doi:10.3390/ijms24054943)
Supplement: Supplementary file 1 [file ijms-24-04943-s001.zip › Supplemental Table 13.xlsx]

## Sheet: Panther-Pathway-WT_vs_930
Table S13. The list of Pathways for DEGs WT vs rs1050813 between 5637 and UROtsa.
	Pathway	Gene	%total	%hits
6	Gonadotropin-releasing hormone receptor pathway (P06664)	79	0.017	0.046
25	Wnt signaling pathway (P00057)	73	0.016	0.043
77	Inflammation mediated by chemokine and cytokine signaling pathway (P00031)	64	0.014	0.038
69	Integrin signalling pathway (P00034)	63	0.014	0.037
19	CCKR signaling map (P06959)	55	0.012	0.032
7	Angiogenesis (P00005)	54	0.012	0.032
116	EGF receptor signaling pathway (P00018)	52	0.011	0.031
87	Huntington disease (P00029)	47	0.01	0.028
44	PDGF signaling pathway (P00047)	45	0.01	0.026
103	FGF signaling pathway (P00021)	38	0.008	0.022
9	Alzheimer disease-presenilin pathway (P00004)	37	0.008	0.022
4	Apoptosis signaling pathway (P00006)	36	0.008	0.021
22	p53 pathway (P00059)	33	0.007	0.019
91	Heterotrimeric G-protein signaling pathway-Gi alpha and Gs alpha mediated pathway (P00026)	33	0.007	0.019
40	Parkinson disease (P00049)	32	0.007	0.019
124	Cadherin signaling pathway (P00012)	31	0.007	0.018
89	Heterotrimeric G-protein signaling pathway-Gq alpha and Go alpha mediated pathway (P00027)	30	0.007	0.018
64	Interleukin signaling pathway (P00036)	29	0.006	0.017
118	Cytoskeletal regulation by Rho GTPase (P00016)	27	0.006	0.016
33	T cell activation (P00053)	23	0.005	0.014
46	Oxidative stress response (P00046)	23	0.005	0.014
48	Nicotinic acetylcholine receptor signaling pathway (P00044)	23	0.005	0.014
34	TGF-beta signaling pathway (P00052)	22	0.005	0.013
75	p53 pathway feedback loops 2 (P04398)	22	0.005	0.013
84	Ras Pathway (P04393)	22	0.005	0.013
20	Ubiquitin proteasome pathway (P00060)	21	0.005	0.012
27	VEGF signaling pathway (P00056)	20	0.004	0.012
128	B cell activation (P00010)	20	0.004	0.012
47	Notch signaling pathway (P00045)	18	0.004	0.011
90	p38 MAPK pathway (P05918)	18	0.004	0.011
42	PI3 kinase pathway (P00048)	17	0.004	0.01
115	Endothelin signaling pathway (P00019)	17	0.004	0.01
30	Toll receptor signaling pathway (P00054)	16	0.004	0.009
11	Alzheimer disease-amyloid secretase pathway (P00003)	14	0.003	0.008
105	FAS signaling pathway (P00020)	13	0.003	0.008
28	Transcription regulation by bZIP transcription factor (P00055)	12	0.003	0.007
50	Muscarinic acetylcholine receptor 1 and 3 signaling pathway (P00042)	12	0.003	0.007
78	p53 pathway by glucose deprivation (P04397)	12	0.003	0.007
107	Angiotensin II-stimulated signaling through G proteins and beta-arrestin (P05911)	12	0.003	0.007
126	Blood coagulation (P00011)	12	0.003	0.007
1	Axon guidance mediated by netrin (P00009)	11	0.002	0.006
49	Muscarinic acetylcholine receptor 2 and 4 signaling pathway (P00043)	11	0.002	0.006
65	Interferon-gamma signaling pathway (P00035)	11	0.002	0.006
104	Dopamine receptor mediated signaling pathway (P05912)	11	0.002	0.006
2	Axon guidance mediated by Slit/Robo (P00008)	10	0.002	0.006
3	Axon guidance mediated by semaphorins (P00007)	10	0.002	0.006
15	Adrenaline and noradrenaline biosynthesis (P00001)	10	0.002	0.006
72	Insulin/IGF pathway-protein kinase B signaling cascade (P00033)	10	0.002	0.006
95	Glycolysis (P00024)	10	0.002	0.006
117	DNA replication (P00017)	10	0.002	0.006
133	5HT2 type receptor mediated signaling pathway (P04374)	10	0.002	0.006
41	De novo purine biosynthesis (P02738)	9	0.002	0.005
53	Metabotropic glutamate receptor group II pathway (P00040)	9	0.002	0.005
58	Metabotropic glutamate receptor group III pathway (P00039)	9	0.002	0.005
74	Insulin/IGF pathway-mitogen activated protein kinase kinase/MAP kinase cascade (P00032)	9	0.002	0.005
79	Hypoxia response via HIF activation (P00030)	9	0.002	0.005
82	Thyrotropin-releasing hormone receptor signaling pathway (P04394)	9	0.002	0.005
86	Oxytocin receptor mediated signaling pathway (P04391)	9	0.002	0.005
97	General transcription regulation (P00023)	9	0.002	0.005
110	Histamine H1 receptor mediated signaling pathway (P04385)	9	0.002	0.005
55	GABA-B receptor II signaling (P05731)	8	0.002	0.005
127	Beta2 adrenergic receptor signaling pathway (P04378)	8	0.002	0.005
129	Beta1 adrenergic receptor signaling pathway (P04377)	8	0.002	0.005
134	5HT1 type receptor mediated signaling pathway (P04373)	8	0.002	0.005
26	Heme biosynthesis (P02746)	7	0.002	0.004
100	General transcription by RNA polymerase I (P00022)	7	0.002	0.004
102	Enkephalin release (P05913)	7	0.002	0.004
109	Pyruvate metabolism (P02772)	7	0.002	0.004
130	5HT4 type receptor mediated signaling pathway (P04376)	7	0.002	0.004
36	TCA cycle (P00051)	6	0.001	0.004
54	Synaptic vesicle trafficking (P05734)	6	0.001	0.004
62	Ionotropic glutamate receptor pathway (P00037)	6	0.001	0.004
93	Hedgehog signaling pathway (P00025)	6	0.001	0.004
98	Serine glycine biosynthesis (P02776)	6	0.001	0.004
108	Histamine H2 receptor mediated signaling pathway (P04386)	6	0.001	0.004
114	Cortocotropin releasing factor receptor signaling pathway (P04380)	6	0.001	0.004
122	Cholesterol biosynthesis (P00014)	6	0.001	0.004
123	Cell cycle (P00013)	6	0.001	0.004
125	Beta3 adrenergic receptor signaling pathway (P04379)	6	0.001	0.004
12	N-acetylglucosamine metabolism (P02756)	5	0.001	0.003
18	Mannose metabolism (P02752)	5	0.001	0.003
29	Fructose galactose metabolism (P02744)	5	0.001	0.003
38	Plasminogen activating cascade (P00050)	5	0.001	0.003
45	Coenzyme A biosynthesis (P02736)	5	0.001	0.003
51	Metabotropic glutamate receptor group I pathway (P00041)	5	0.001	0.003
60	JAK/STAT signaling pathway (P00038)	5	0.001	0.003
88	Heterotrimeric G-protein signaling pathway-rod outer segment phototransduction (P00028)	5	0.001	0.003
92	Opioid proopiomelanocortin pathway (P05917)	5	0.001	0.003
94	Opioid prodynorphin pathway (P05916)	5	0.001	0.003
96	Opioid proenkephalin pathway (P05915)	5	0.001	0.003
99	Nicotine pharmacodynamics pathway (P06587)	5	0.001	0.003
135	5-Hydroxytryptamine degredation (P04372)	5	0.001	0.003
24	mRNA splicing (P00058)	4	0.001	0.002
61	Androgen/estrogene/progesterone biosynthesis (P02727)	4	0.001	0.002
131	Pentose phosphate pathway (P02762)	4	0.001	0.002
10	O-antigen biosynthesis (P02757)	3	0.001	0.002
13	Alpha adrenergic receptor signaling pathway (P00002)	3	0.001	0.002
56	Endogenous cannabinoid signaling (P05730)	3	0.001	0.002
70	Vitamin B6 metabolism (P02787)	3	0.001	0.002
81	Vasopressin synthesis (P04395)	3	0.001	0.002
111	Pyrimidine Metabolism (P02771)	3	0.001	0.002
112	Gamma-aminobutyric acid synthesis (P04384)	3	0.001	0.002
121	Proline biosynthesis (P02768)	3	0.001	0.002
132	5HT3 type receptor mediated signaling pathway (P04375)	3	0.001	0.002
5	Pyridoxal-5-phosphate biosynthesis (P02759)	2	0	0.001
21	Leucine biosynthesis (P02749)	2	0	0.001
23	Isoleucine biosynthesis (P02748)	2	0	0.001
31	Formyltetrahydrofolate biosynthesis (P02743)	2	0	0.001
35	Flavin biosynthesis (P02741)	2	0	0.001
37	De novo pyrimidine ribonucleotides biosythesis (P02740)	2	0	0.001
39	De novo pyrimidine deoxyribonucleotide biosynthesis (P02739)	2	0	0.001
52	Asparagine and aspartate biosynthesis (P02730)	2	0	0.001
57	Ascorbate degradation (P02729)	2	0	0.001
63	Aminobutyrate degradation (P02726)	2	0	0.001
68	Adenine and hypoxanthine salvage pathway (P02723)	2	0	0.001
73	ATP synthesis (P02721)	2	0	0.001
76	Valine biosynthesis (P02785)	2	0	0.001
80	Vitamin D metabolism and pathway (P04396)	2	0	0.001
85	P53 pathway feedback loops 1 (P04392)	2	0	0.001
119	Purine metabolism (P02769)	2	0	0.001
120	Circadian clock system (P00015)	2	0	0.001
8	Ornithine degradation (P02758)	1	0	0.001
14	Methylmalonyl pathway (P02755)	1	0	0.001
16	Methylcitrate cycle (P02754)	1	0	0.001
17	Methionine biosynthesis (P02753)	1	0	0.001
32	Tetrahydrofolate biosynthesis (P02742)	1	0	0.001
43	Cysteine biosynthesis (P02737)	1	0	0.001
59	Arginine biosynthesis (P02728)	1	0	0.001
66	Alanine biosynthesis (P02724)	1	0	0.001
67	Xanthine and guanine salvage pathway (P02788)	1	0	0.001
71	Acetate utilization (P02722)	1	0	0.001
83	Threonine biosynthesis (P02781)	1	0	0.001
101	Salvage pyrimidine ribonucleotides (P02775)	1	0	0.001
106	S-adenosylmethionine biosynthesis (P02773)	1	0	0.001
113	Pyridoxal phosphate salvage pathway (P02770)	1	0	0.001
