# Supplementary material for: Association of SNPs in the PAI1 Gene with Disease Recurrence and Clinical Outcome in Bladder Cancer
Source: Int J Mol Sci. 2023 Mar 3;24(5):4943. doi: 10.3390/ijms24054943 (PMC10003630; doi:10.3390/ijms24054943)
Supplement: Supplementary file 1 [file ijms-24-04943-s001.zip › Supplemental Table 14.xlsx]

## Sheet: Panther-Pathway-WT_vs_clones
Table S14. The list of Pathways for DEGs WT vs Clones between 5637 and UROtsa.
	Pathway	Gene	%total	%hits
5	Gonadotropin-releasing hormone receptor pathway (P06664)	28	0.025	0.05
17	Wnt signaling pathway (P00057)	26	0.023	0.046
50	Integrin signalling pathway (P00034)	26	0.023	0.046
56	Inflammation mediated by chemokine and cytokine signaling pathway (P00031)	25	0.023	0.044
14	CCKR signaling map (P06959)	22	0.02	0.039
6	Angiogenesis (P00005)	20	0.018	0.035
88	EGF receptor signaling pathway (P00018)	20	0.018	0.035
63	Huntington disease (P00029)	16	0.014	0.028
65	Heterotrimeric G-protein signaling pathway-Gq alpha and Go alpha mediated pathway (P00027)	15	0.014	0.027
78	FGF signaling pathway (P00021)	15	0.014	0.027
67	Heterotrimeric G-protein signaling pathway-Gi alpha and Gs alpha mediated pathway (P00026)	14	0.013	0.025
32	PDGF signaling pathway (P00047)	13	0.012	0.023
29	Parkinson disease (P00049)	12	0.011	0.021
47	Interleukin signaling pathway (P00036)	12	0.011	0.021
94	Cadherin signaling pathway (P00012)	12	0.011	0.021
8	Alzheimer disease-presenilin pathway (P00004)	11	0.01	0.02
24	T cell activation (P00053)	11	0.01	0.02
4	Apoptosis signaling pathway (P00006)	10	0.009	0.018
34	Oxidative stress response (P00046)	10	0.009	0.018
61	Ras Pathway (P04393)	9	0.008	0.016
15	Ubiquitin proteasome pathway (P00060)	8	0.007	0.014
16	p53 pathway (P00059)	8	0.007	0.014
98	B cell activation (P00010)	8	0.007	0.014
9	Alzheimer disease-amyloid secretase pathway (P00003)	7	0.006	0.012
19	VEGF signaling pathway (P00056)	7	0.006	0.012
25	TGF-beta signaling pathway (P00052)	7	0.006	0.012
87	Endothelin signaling pathway (P00019)	7	0.006	0.012
90	Cytoskeletal regulation by Rho GTPase (P00016)	7	0.006	0.012
22	Toll receptor signaling pathway (P00054)	6	0.005	0.011
38	Muscarinic acetylcholine receptor 1 and 3 signaling pathway (P00042)	6	0.005	0.011
55	p53 pathway feedback loops 2 (P04398)	6	0.005	0.011
66	p38 MAPK pathway (P05918)	6	0.005	0.011
1	Axon guidance mediated by netrin (P00009)	5	0.005	0.009
31	PI3 kinase pathway (P00048)	5	0.005	0.009
53	Insulin/IGF pathway-protein kinase B signaling cascade (P00033)	5	0.005	0.009
80	FAS signaling pathway (P00020)	5	0.005	0.009
3	Axon guidance mediated by semaphorins (P00007)	4	0.004	0.007
20	Transcription regulation by bZIP transcription factor (P00055)	4	0.004	0.007
35	Notch signaling pathway (P00045)	4	0.004	0.007
48	Interferon-gamma signaling pathway (P00035)	4	0.004	0.007
59	Thyrotropin-releasing hormone receptor signaling pathway (P04394)	4	0.004	0.007
62	Oxytocin receptor mediated signaling pathway (P04391)	4	0.004	0.007
75	General transcription by RNA polymerase I (P00022)	4	0.004	0.007
84	Histamine H1 receptor mediated signaling pathway (P04385)	4	0.004	0.007
89	DNA replication (P00017)	4	0.004	0.007
102	5HT2 type receptor mediated signaling pathway (P04374)	4	0.004	0.007
2	Axon guidance mediated by Slit/Robo (P00008)	3	0.003	0.005
11	Adrenaline and noradrenaline biosynthesis (P00001)	3	0.003	0.005
21	Fructose galactose metabolism (P02744)	3	0.003	0.005
26	TCA cycle (P00051)	3	0.003	0.005
54	Insulin/IGF pathway-mitogen activated protein kinase kinase/MAP kinase cascade (P00032)	3	0.003	0.005
58	Hypoxia response via HIF activation (P00030)	3	0.003	0.005
71	Glycolysis (P00024)	3	0.003	0.005
77	Enkephalin release (P05913)	3	0.003	0.005
81	Angiotensin II-stimulated signaling through G proteins and beta-arrestin (P05911)	3	0.003	0.005
101	Pentose phosphate pathway (P02762)	3	0.003	0.005
33	Coenzyme A biosynthesis (P02736)	2	0.002	0.004
36	Nicotinic acetylcholine receptor signaling pathway (P00044)	2	0.002	0.004
40	Metabotropic glutamate receptor group II pathway (P00040)	2	0.002	0.004
42	GABA-B receptor II signaling (P05731)	2	0.002	0.004
57	p53 pathway by glucose deprivation (P04397)	2	0.002	0.004
69	Hedgehog signaling pathway (P00025)	2	0.002	0.004
73	General transcription regulation (P00023)	2	0.002	0.004
76	Nicotine pharmacodynamics pathway (P06587)	2	0.002	0.004
79	Dopamine receptor mediated signaling pathway (P05912)	2	0.002	0.004
82	Histamine H2 receptor mediated signaling pathway (P04386)	2	0.002	0.004
86	Cortocotropin releasing factor receptor signaling pathway (P04380)	2	0.002	0.004
95	Beta3 adrenergic receptor signaling pathway (P04379)	2	0.002	0.004
96	Blood coagulation (P00011)	2	0.002	0.004
97	Beta2 adrenergic receptor signaling pathway (P04378)	2	0.002	0.004
99	Beta1 adrenergic receptor signaling pathway (P04377)	2	0.002	0.004
100	5HT4 type receptor mediated signaling pathway (P04376)	2	0.002	0.004
7	Ornithine degradation (P02758)	1	0.001	0.002
10	Alpha adrenergic receptor signaling pathway (P00002)	1	0.001	0.002
12	Methylcitrate cycle (P02754)	1	0.001	0.002
13	Methionine biosynthesis (P02753)	1	0.001	0.002
18	Heme biosynthesis (P02746)	1	0.001	0.002
23	Formyltetrahydrofolate biosynthesis (P02743)	1	0.001	0.002
27	De novo pyrimidine ribonucleotides biosythesis (P02740)	1	0.001	0.002
28	Plasminogen activating cascade (P00050)	1	0.001	0.002
30	De novo purine biosynthesis (P02738)	1	0.001	0.002
37	Muscarinic acetylcholine receptor 2 and 4 signaling pathway (P00043)	1	0.001	0.002
39	Metabotropic glutamate receptor group I pathway (P00041)	1	0.001	0.002
41	Synaptic vesicle trafficking (P05734)	1	0.001	0.002
43	Endogenous cannabinoid signaling (P05730)	1	0.001	0.002
44	Ascorbate degradation (P02729)	1	0.001	0.002
45	Arginine biosynthesis (P02728)	1	0.001	0.002
46	Metabotropic glutamate receptor group III pathway (P00039)	1	0.001	0.002
49	Adenine and hypoxanthine salvage pathway (P02723)	1	0.001	0.002
51	Vitamin B6 metabolism (P02787)	1	0.001	0.002
52	Acetate utilization (P02722)	1	0.001	0.002
60	Threonine biosynthesis (P02781)	1	0.001	0.002
64	Heterotrimeric G-protein signaling pathway-rod outer segment phototransduction (P00028)	1	0.001	0.002
68	Opioid proopiomelanocortin pathway (P05917)	1	0.001	0.002
70	Opioid prodynorphin pathway (P05916)	1	0.001	0.002
72	Opioid proenkephalin pathway (P05915)	1	0.001	0.002
74	Serine glycine biosynthesis (P02776)	1	0.001	0.002
83	Pyruvate metabolism (P02772)	1	0.001	0.002
85	Gamma-aminobutyric acid synthesis (P04384)	1	0.001	0.002
91	Purine metabolism (P02769)	1	0.001	0.002
92	Circadian clock system (P00015)	1	0.001	0.002
93	Cell cycle (P00013)	1	0.001	0.002
103	5HT1 type receptor mediated signaling pathway (P04373)	1	0.001	0.002
104	5-Hydroxytryptamine degredation (P04372)	1	0.001	0.002
